# Supplementary material for: Comparison of Lipids and Volatile Compounds in Dezhou Donkey Meat with High and Low Intramuscular Fat Content
Source: MDPI journal article supplement (doi:10.3390/foods12173269), 2023-08-31
Supplement: s1 [file s1]

## Supplementary information

**Figure S1:** Consumer health indexes based on fatty acid concentrations between the H\_IMF and L\_IMF groups. AI, atherogenic index; TI, thrombogenic index; h/H, hypocholesterolemic/hypercholesterolemic; H\_IMF, high intramuscular fat group; L\_IMF, low intramuscular fat group. \* $P < 0.05$ .

**Table S1:** Basic information on 80 donkeys.

**Table S2:** Lipid molecular species identified in the low and high intramuscular fat groups using untargeted lipidomics (n=8).

**Table S3:** Significantly changed lipid molecules between the low and high intramuscular fat groups (n=8).

**Table S4:** Significantly changed and  $FC > 2/FC < 0.5$  lipid molecules between the low and high intramuscular fat groups (n=8).

**Table S5:** Aroma compounds identified in donkey meats (n=8).

**Table S6:** Odor thresholds and odor active values in low and high intramuscular fat groups (n=8).

**Table S7:** Odorants (OAV > 1) in low and high intramuscular fat groups (n=8).

**Table S8:** Significantly changed odorants between the low and high intramuscular fat groups (n=8).

**Table S9:** Correlation between the fatty acids and differential odorants.

**Table S10:** Correlation between the differential lipids and differential odorants.

## Supplementary Figure

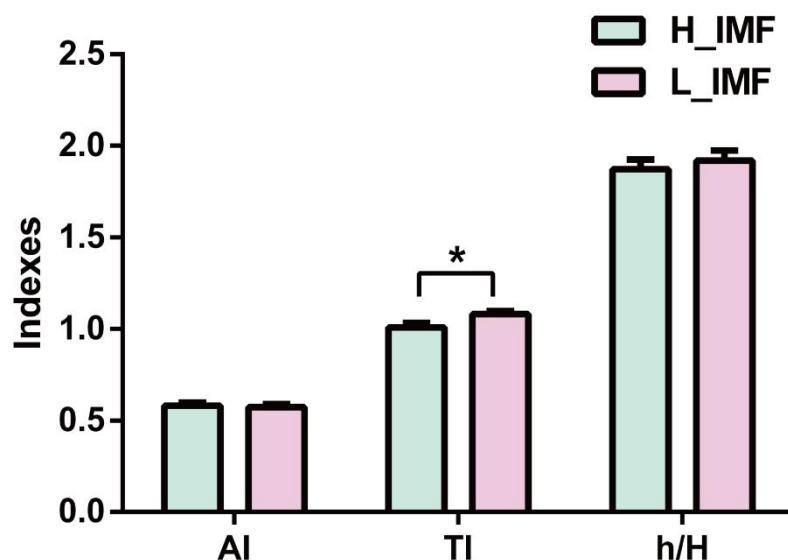

**Figure S1.** Consumer health indexes based on fatty acid concentrations between the H\_IMF and L\_IMF groups. AI, atherogenic index; TI, thrombogenic index; h/H, hypocholesterolemic/hypercholesterolemic; H\_IMF, high intramuscular fat group; L\_IMF, low intramuscular fat group. \* $P < 0.05$ . Three indexes were calculated based on FA concentrations as follows:

1 Atherogenic index (AI):  $[C12:0 + (4 \times C14:0) + C16:0] / [n-6 \text{ PUFA} + n-3 \text{ PUFA} + \text{MUFA}]$  (Ulbricht & Southgate, 1991).

2 Thrombogenic index (TI):  $[C14:0 + C16:0 + C18:0] / [0.5 \times \text{MUFA} + 0.5 \times n-6 \text{ PUFA} + 3 \times n-3 \text{ PUFA} + (n-3 \text{ PUFA} / n-6 \text{ PUFA})]$  (Ulbricht & Southgate, 1991).

3 Hypocholesterolemic / hypercholesterolemic (h/H):  $[C18:1 \text{ cis-9} + C18:2 \text{ n-6} + C20:4 \text{ n-6} + C18:3 \text{ n-3} + C20:5 \text{ n-3} + C22:5 \text{ n-3} + C22:6 \text{ n-3}] / [C14:0 + C16:0]$  (Flakemore, Malau-Aduli, Nichols, & Malau-Aduli, 2017).

### References

- Flakemore, A. R., Malau-Aduli, B. S., Nichols, P. D., & Malau-Aduli, A. E. O. (2017). Omega-3 fatty acids, nutrient retention values, and sensory meat eating quality in cooked and raw Australia lamb. *Meat Science*, 123, 79–87.  
<https://doi.org/10.1016/j.meatsci.2016.09.006>
- Ulbricht, T. L. V., & Southgate, D. A. T. (1991). Coronary heart disease: seven dietary factors. *Lancet*, 338(8773), 985–992.  
[https://doi.org/10.1016/0140-6736\(91\)91846-M](https://doi.org/10.1016/0140-6736(91)91846-M)

## Supplementary Tables

**Table S1.** Basic information on 80 donkeys

| <b>NO.</b> | <b>Srain</b>  | <b>Sex</b> | <b>Age<br/>(years)</b> | <b>Carcass<br/>weights (kg)</b> | <b>IMF<br/>content (%)</b> | <b>Group</b> |
|------------|---------------|------------|------------------------|---------------------------------|----------------------------|--------------|
| DK01       | Dezhou donkey | male       | 3                      | 146.00                          | 5.95                       | H-IMF 1      |
| DK02       | Dezhou donkey | male       | 2.5                    | 121.40                          | 5.50                       | H-IMF 2      |
| DK03       | Dezhou donkey | male       | 2                      | 105.00                          | 5.09                       | H-IMF 3      |
| DK04       | Dezhou donkey | male       | 2.5                    | 135.80                          | 4.66                       | H-IMF 4      |
| DK05       | Dezhou donkey | male       | 3                      | 146.50                          | 4.12                       | H-IMF 5      |
| DK06       | Dezhou donkey | male       | 2.5                    | 121.60                          | 4.12                       | H-IMF 6      |
| DK07       | Dezhou donkey | male       | 2.5                    | 97.20                           | 4.12                       | H-IMF 7      |
| DK08       | Dezhou donkey | male       | 2.5                    | 121.20                          | 4.11                       | H-IMF 8      |
| DK09       | Dezhou donkey | male       | 2                      | 122.50                          | 3.72                       |              |
| DK10       | Dezhou donkey | male       | 3                      | 149.50                          | 3.70                       |              |
| DK11       | Dezhou donkey | male       | 2.5                    | 150.60                          | 3.65                       |              |
| DK12       | Dezhou donkey | male       | 3                      | 133.75                          | 3.65                       |              |
| DK13       | Dezhou donkey | male       | 2.5                    | 157.60                          | 3.63                       |              |
| DK14       | Dezhou donkey | male       | 2.5                    | 139.60                          | 3.53                       |              |
| DK15       | Dezhou donkey | male       | 2                      | 157.50                          | 3.48                       |              |
| DK16       | Dezhou donkey | male       | 2.5                    | 100.40                          | 3.47                       |              |
| DK17       | Dezhou donkey | male       | 2.5                    | 140.60                          | 3.33                       |              |
| DK18       | Dezhou donkey | male       | 2.5                    | 137.80                          | 3.32                       |              |
| DK19       | Dezhou donkey | male       | 2.5                    | 165.60                          | 3.32                       |              |
| DK20       | Dezhou donkey | male       | 2.5                    | 127.60                          | 3.25                       |              |
| DK21       | Dezhou donkey | male       | 2.5                    | 188.30                          | 3.22                       |              |
| DK22       | Dezhou donkey | male       | 2.5                    | 142.00                          | 3.18                       |              |
| DK23       | Dezhou donkey | male       | 3                      | 147.50                          | 3.16                       |              |
| DK24       | Dezhou donkey | male       | 2.5                    | 132.00                          | 3.15                       |              |
| DK25       | Dezhou donkey | male       | 2.5                    | 154.00                          | 3.11                       |              |
| DK26       | Dezhou donkey | male       | 2.5                    | 114.80                          | 3.10                       |              |
| DK27       | Dezhou donkey | male       | 2.5                    | 172.20                          | 3.04                       |              |
| DK28       | Dezhou donkey | male       | 2.5                    | 163.60                          | 3.02                       |              |
| DK29       | Dezhou donkey | male       | 2.5                    | 155.40                          | 3.02                       |              |
| DK30       | Dezhou donkey | male       | 2.5                    | 124.40                          | 2.98                       |              |
| DK31       | Dezhou donkey | male       | 2.5                    | 132.50                          | 2.98                       |              |
| DK32       | Dezhou donkey | male       | 2.5                    | 116.00                          | 2.97                       |              |
| DK33       | Dezhou donkey | male       | 2.5                    | 131.60                          | 2.96                       |              |
| DK34       | Dezhou donkey | male       | 2.5                    | 133.80                          | 2.94                       |              |
| DK35       | Dezhou donkey | male       | 2.5                    | 117.60                          | 2.92                       |              |
| DK36       | Dezhou donkey | male       | 2.5                    | 151.80                          | 2.91                       |              |
| DK37       | Dezhou donkey | male       | 2                      | 120.00                          | 2.81                       |              |
| DK38       | Dezhou donkey | male       | 2.5                    | 157.80                          | 2.73                       |              |
| DK39       | Dezhou donkey | male       | 2.5                    | 138.50                          | 2.72                       |              |
| DK40       | Dezhou donkey | male       | 2.5                    | 130.40                          | 2.69                       |              |
| DK41       | Dezhou donkey | male       | 2.5                    | 154.85                          | 2.67                       |              |
| DK42       | Dezhou donkey | male       | 2.5                    | 103.60                          | 2.63                       |              |

|      |               |      |     |        |      |         |
|------|---------------|------|-----|--------|------|---------|
| DK43 | Dezhou donkey | male | 2.5 | 130.60 | 2.54 |         |
| DK44 | Dezhou donkey | male | 2   | 119.50 | 2.52 |         |
| DK45 | Dezhou donkey | male | 2.5 | 139.80 | 2.51 |         |
| DK46 | Dezhou donkey | male | 2.5 | 152.00 | 2.51 |         |
| DK47 | Dezhou donkey | male | 2.5 | 168.40 | 2.51 |         |
| DK48 | Dezhou donkey | male | 2.5 | 148.00 | 2.50 |         |
| DK49 | Dezhou donkey | male | 2.5 | 152.20 | 2.49 |         |
| DK50 | Dezhou donkey | male | 2.5 | 153.00 | 2.49 |         |
| DK51 | Dezhou donkey | male | 2.5 | 148.20 | 2.48 |         |
| DK52 | Dezhou donkey | male | 2.5 | 174.40 | 2.47 |         |
| DK53 | Dezhou donkey | male | 2.5 | 145.80 | 2.42 |         |
| DK54 | Dezhou donkey | male | 2.5 | 159.80 | 2.39 |         |
| DK55 | Dezhou donkey | male | 2.5 | 137.00 | 2.37 |         |
| DK56 | Dezhou donkey | male | 2   | 124.20 | 2.37 |         |
| DK57 | Dezhou donkey | male | 2.5 | 128.20 | 2.36 |         |
| DK58 | Dezhou donkey | male | 2   | 99.25  | 2.35 |         |
| DK59 | Dezhou donkey | male | 2.5 | 135.60 | 2.34 |         |
| DK60 | Dezhou donkey | male | 3   | 151.00 | 2.33 |         |
| DK61 | Dezhou donkey | male | 3   | 132.00 | 2.32 |         |
| DK62 | Dezhou donkey | male | 2.5 | 116.40 | 2.28 |         |
| DK63 | Dezhou donkey | male | 3   | 141.00 | 2.26 |         |
| DK64 | Dezhou donkey | male | 2.5 | 129.80 | 2.23 |         |
| DK65 | Dezhou donkey | male | 2   | 137.50 | 2.21 |         |
| DK66 | Dezhou donkey | male | 2.5 | 147.40 | 2.15 |         |
| DK67 | Dezhou donkey | male | 2.5 | 134.40 | 2.15 |         |
| DK68 | Dezhou donkey | male | 2.5 | 167.75 | 2.11 |         |
| DK69 | Dezhou donkey | male | 2.5 | 116.40 | 2.11 |         |
| DK70 | Dezhou donkey | male | 2.5 | 139.20 | 2.10 |         |
| DK71 | Dezhou donkey | male | 2.5 | 150.40 | 2.10 |         |
| DK72 | Dezhou donkey | male | 2.5 | 121.20 | 2.07 |         |
| DK73 | Dezhou donkey | male | 2   | 102.50 | 2.05 | L-IMF 8 |
| DK74 | Dezhou donkey | male | 2   | 117.50 | 2.05 | L-IMF 7 |
| DK75 | Dezhou donkey | male | 2.5 | 134.20 | 1.92 | L-IMF 6 |
| DK76 | Dezhou donkey | male | 2.5 | 128.00 | 1.87 | L-IMF 5 |
| DK77 | Dezhou donkey | male | 2.5 | 134.80 | 1.76 | L-IMF 4 |
| DK78 | Dezhou donkey | male | 2.5 | 139.20 | 1.76 | L-IMF 3 |
| DK79 | Dezhou donkey | male | 2.5 | 120.60 | 1.39 | L-IMF 2 |
| DK80 | Dezhou donkey | male | 2.5 | 117.60 | 1.34 | L-IMF 1 |

H-IMF, high intramuscular fat group; L-IMF, low intramuscular fat group.

**Table S2.** Lipid molecular species identified in the low and high intramuscular fat groups using untargeted lipidomics (n=8).

| Category      | Class    | Compounds                    | Average Mz | Adduct                     | Rt(min) | H-1        | H-2    | H-3    | H-4    | H-5    | H-6    | H-7    | H-8    | L-1    | L-2    | L-3    | L-4    | L-5    | L-6    | L-7    | L-8    |
|---------------|----------|------------------------------|------------|----------------------------|---------|------------|--------|--------|--------|--------|--------|--------|--------|--------|--------|--------|--------|--------|--------|--------|--------|
| Sterol lipids | AHexBRS  | ASG<br>28:2;O;Hex;FA<br>15:4 | 821.55988  | [M-H]-                     | 6.92    | 11197      | 13743  | 8928   | 7761   | 6950   | 12824  | 14291  | 5030   | 11080  | 12459  | 14220  | 15056  | 10233  | 6487   | 12810  | 15403  |
|               | AHexBRS  | ASG<br>28:2;O;Hex;FA<br>16:2 | 839.60071  | [M-H]-                     | 7.551   | 3782       | 3357   | 12062  | 2151   | 2607   | 2707   | 2469   | 15230  | 4890   | 2141   | 2794   | 7408   | 3665   | 2278   | 1916   | 2313   |
|               | AHexCAS  | ASG<br>28:1;O;Hex;FA<br>21:0 | 915.72363  | [M-H]-                     | 9.428   | 2068       | 3072   | 1925   | 2683   | 1867   | 412    | 1015   | 1621   | 486    | 456    | 870    | 156    | 1709   | 441    | 98     | 541    |
|               | AHexCS   | ASG<br>27:1;O;Hex;FA<br>12:0 | 748.61426  | [M+NH4]<br>+               | 6.527   | 36527      | 4154   | 14227  | 29215  | 111617 | 62815  | 8701   | 60689  | 84259  | 6443   | 15941  | 29592  | 48013  | 27383  | 8314   | 33896  |
|               | AHexCS   | ASG<br>27:1;O;Hex;FA 9:0     | 706.5705   | [M+NH4]<br>+               | 5.135   | 6309       | 10754  | 1483   | 9579   | 11410  | 16888  | 9175   | 14033  | 16463  | 5168   | 13437  | 14780  | 9476   | 12685  | 17988  | 10437  |
|               | BRSE     | SE 28:2/14:0                 | 626.58582  | [M+NH4]<br>+               | 6.523   | 10425      | 3631   | 13837  | 6505   | 10390  | 16276  | 9483   | 25339  | 24761  | 12139  | 11632  | 14865  | 14453  | 1189   | 990    | 7970   |
|               | BRSE     | SE 28:2/17:1                 | 666.61401  | [M+NH4]<br>+               | 9.216   | 18680<br>7 | 98093  | 114883 | 101778 | 132855 | 216621 | 116961 | 126656 | 147231 | 164477 | 147884 | 167459 | 173406 | 137521 | 243144 | 146205 |
|               | CASE     | SE 28:1/14:0                 | 628.60284  | [M+NH4]<br>+               | 8.122   | 1227       | 1636   | 1204   | 897    | 2198   | 3364   | 992    | 599    | 902    | 962    | 1220   | 485    | 2061   | 966    | 2240   | 1872   |
|               | DCAE     | SE 24:1;O4/8:0               | 536.42719  | [M+NH4]<br>+               | 2.763   | 14397      | 17718  | 13985  | 14146  | 17885  | 15149  | 10376  | 16170  | 16885  | 13331  | 14066  | 18500  | 14711  | 17703  | 17561  | 13949  |
|               | DCAE     | SE 24:1;O4/15:0              | 615.48877  | [M-H]-                     | 6.803   | 3124       | 2740   | 2339   | 2886   | 3820   | 2709   | 2203   | 2632   | 2277   | 2419   | 2697   | 2677   | 2180   | 2420   | 2395   | 2656   |
|               | DCAE     | SE 24:1;O4/15:1;O1           | 629.49121  | [M-H]-                     | 7.909   | 1421       | 2015   | 1815   | 2002   | 2656   | 1434   | 2096   | 1117   | 1402   | 981    | 1262   | 1396   | 1842   | 1333   | 1158   | 902    |
|               | DCAE     | SE 24:1;O4/19:2              | 667.53064  | [M-H]-                     | 3.545   | 4869       | 4811   | 4437   | 4281   | 4532   | 3864   | 3179   | 4962   | 4933   | 3308   | 4445   | 4298   | 4118   | 4455   | 4588   | 4552   |
|               | DCAE     | SE 24:1;O4/20:0              | 685.58881  | [M-H]-                     | 7.581   | 12859      | 12738  | 12147  | 12911  | 11954  | 13019  | 14178  | 12695  | 14988  | 12791  | 15075  | 15087  | 13528  | 14425  | 13941  | 13480  |
|               | DCAE     | SE 24:1;O4/22:0              | 713.62042  | [M-H]-                     | 7.95    | 47604      | 52219  | 51742  | 51318  | 46571  | 49023  | 47799  | 48771  | 53942  | 47383  | 53384  | 49848  | 47138  | 52065  | 46399  | 49879  |
|               | DCAE     | SE 24:1;O4/22:0;O1           | 729.61896  | [M-H]-                     | 7.117   | 95272      | 98386  | 48514  | 97273  | 94512  | 101427 | 91749  | 87663  | 101955 | 96684  | 101791 | 95676  | 97199  | 98903  | 96627  | 96674  |
|               | DCAE     | SE 24:1;O4/24:0;O1           | 757.63995  | [M-H]-                     | 6.911   | 12782      | 14841  | 14074  | 12116  | 14042  | 14503  | 14775  | 17651  | 15958  | 17663  | 13337  | 12193  | 7629   | 19100  | 11584  | 8683   |
|               | DCAE     | SE 24:1;O4/25:0              | 755.65356  | [M-H]-                     | 8.437   | 3074       | 3831   | 3062   | 3221   | 3786   | 3230   | 3789   | 2989   | 3153   | 3860   | 3445   | 3354   | 3543   | 4005   | 3506   | 3337   |
|               | DCAE     | SE 24:1;O4/25:0;O1           | 771.64862  | [M-H]-                     | 8.239   | 8988       | 8824   | 7926   | 8018   | 8274   | 9172   | 7681   | 7984   | 10405  | 6944   | 9860   | 8442   | 9542   | 8991   | 7867   | 8230   |
|               | DCAE     | SE 24:1;O4/26:0;O1           | 785.66162  | [M-H]-                     | 8.367   | 2756       | 2832   | 2533   | 2449   | 2643   | 2648   | 2129   | 2677   | 2997   | 2561   | 2767   | 2727   | 2844   | 2888   | 1557   | 2398   |
|               | DCAE     | SE 24:1;O4/27:0;O1           | 799.67841  | [M-H]-                     | 8.526   | 2975       | 3313   | 4567   | 3236   | 3308   | 3710   | 2972   | 4669   | 4615   | 3682   | 3335   | 2978   | 3605   | 3462   | 3130   | 3089   |
|               | SSulfate | ST 27:1;O;S                  | 465.30423  | [M-H]-                     | 4.023   | 5242       | 4847   | 4947   | 4568   | 5610   | 4808   | 4543   | 4499   | 5317   | 4143   | 4387   | 4452   | 4489   | 4951   | 4151   | 4629   |
|               | SSulfate | ST 29:2;O;S                  | 491.32001  | [M-H]-                     | 4.199   | 2537       | 3113   | 2520   | 1971   | 3746   | 2424   | 2499   | 2027   | 1663   | 671    | 1513   | 1227   | 3015   | 1467   | 648    | 738    |
|               | ST       | ST 27:1;O                    | 369.3483   | [M+H-H2<br>O] <sup>+</sup> | 4.465   | 70044<br>9 | 605860 | 573924 | 662383 | 639509 | 643398 | 583428 | 604642 | 515975 | 545855 | 593840 | 514866 | 521527 | 600612 | 552853 | 509951 |

|                          |          |                                                        |           |                                     |       |       |       |        |       |       |       |       |       |       |       |       |       |       |       |       |       |
|--------------------------|----------|--------------------------------------------------------|-----------|-------------------------------------|-------|-------|-------|--------|-------|-------|-------|-------|-------|-------|-------|-------|-------|-------|-------|-------|-------|
|                          | ST       | ST 27:2;O                                              | 385.34421 | [M+H] <sup>+</sup>                  | 4.274 | 32054 | 42390 | 28382  | 52448 | 43642 | 15841 | 28540 | 27549 | 13558 | 12210 | 21853 | 13989 | 27109 | 14271 | 12365 | 12311 |
|                          | ST       | ST 28:1;O                                              | 383.35965 | [M+H-H <sub>2</sub> O] <sup>+</sup> | 9.341 | 1910  | 3846  | 899    | 2376  | 2540  | 2251  | 1593  | 2022  | 2197  | 3888  | 2631  | 1329  | 1308  | 1710  | 2178  | 0     |
|                          | ST       | ST 29:1;O                                              | 397.37933 | [M+H-H <sub>2</sub> O] <sup>+</sup> | 9.456 | 52373 | 46324 | 42563  | 32132 | 39584 | 41861 | 35583 | 39087 | 41490 | 36219 | 53203 | 41117 | 52401 | 38591 | 50490 | 36673 |
|                          | ST       | ST 29:2;O                                              | 395.36215 | [M+H-H <sub>2</sub> O] <sup>+</sup> | 8.252 | 10958 | 16515 | 15228  | 7173  | 15101 | 11620 | 14722 | 14284 | 16492 | 13461 | 15976 | 15230 | 595   | 742   | 13127 | 11832 |
| Glycerol<br>phospholidis | BMP      | BMP 32:0 BMP 16:0_16:0<br>CL 70:3 CL 16:0_16:0_16:0_22 | 740.53302 | [M+NH <sub>4</sub> ] <sup>+</sup>   | 4.267 | 56326 | 6108  | 144907 | 11933 | 39223 | 51216 | 8353  | 31037 | 66190 | 60349 | 32300 | 54868 | 90135 | 53865 | 56812 | 57580 |
|                          | CL       | CL 72:7 CL 18:1_18:2_18:2_18                           | 714.50824 | [M-2H] <sup>2-</sup>                | 6.795 | 35541 | 45312 | 76018  | 43475 | 61322 | 48520 | 38374 | 48895 | 67160 | 47595 | 42940 | 61646 | 95316 | 58723 | 60151 | 73387 |
|                          | CL       | CL 72:8 CL 18:2_18:2_18:2_18                           | 724.4881  | [M-2H] <sup>2-</sup>                | 8.735 | 3882  | 2088  | 2929   | 2634  | 3413  | 3521  | 3804  | 2529  | 4184  | 2409  | 2778  | 4018  | 3011  | 2982  | 2854  | 3188  |
|                          | CL       | CL 75:6 CL 17:0_18:0_18:0_22                           | 723.47913 | [M-2H] <sup>2-</sup>                | 8.564 | 20964 | 15215 | 14108  | 13125 | 17789 | 14874 | 15879 | 14104 | 21009 | 15872 | 17882 | 23704 | 20905 | 18162 | 17104 | 19723 |
|                          | CL       | CL 78:1 CL 16:0_16:0_28:0_18                           | 746.51044 | [M-2H] <sup>2-</sup>                | 6.874 | 2634  | 5083  | 4586   | 4927  | 3698  | 4952  | 4179  | 4835  | 8809  | 2614  | 4354  | 6252  | 10216 | 5743  | 5852  | 7145  |
|                          | CL       | CL 82:16 CL 20:4_20:4_20:4_22                          | 772.58398 | [M-2H] <sup>2-</sup>                | 7.991 | 5756  | 3434  | 3154   | 3177  | 3687  | 6139  | 3486  | 4219  | 2813  | 2950  | 5637  | 4482  | 4831  | 5218  | 3369  | 4323  |
|                          | CL       | CL 83:18 CL 17:0_22:6_22:6_22                          | 785.50977 | [M-2H] <sup>2-</sup>                | 7.441 | 3485  | 4259  | 2283   | 2777  | 358   | 3135  | 2156  | 3298  | 2748  | 2181  | 2378  | 3264  | 2471  | 2363  | 3135  | 1415  |
|                          | CL       | CL 12:0_12:0_12:0_24                                   | 790.50238 | [M-2H] <sup>2-</sup>                | 6.977 | 5028  | 6789  | 7421   | 6397  | 6561  | 6566  | 5218  | 6540  | 5973  | 5679  | 3808  | 5867  | 3938  | 5455  | 5302  | 5228  |
|                          | CL       | CL 12:0_12:0_14:0_17                                   | 647.45435 | [M-H] <sup>-</sup>                  | 4.193 | 3021  | 3267  | 2560   | 2271  | 4107  | 1778  | 2238  | 1845  | 1963  | 1152  | 1435  | 1536  | 2678  | 1523  | 1193  | 919   |
|                          | CL       | CL 12:0_15:0_18:0_28                                   | 612.41687 | [M-H] <sup>-</sup>                  | 4.025 | 2725  | 2735  | 2950   | 2349  | 3180  | 2227  | 2227  | 2523  | 2640  | 1858  | 2300  | 2341  | 3052  | 2853  | 2335  | 2092  |
|                          | CL       | CL 12:0_15:1_26:0_22                                   | 738.5509  | [M-H] <sup>-</sup>                  | 7.332 | 2421  | 2002  | 451    | 622   | 3370  | 3579  | 1482  | 1537  | 2665  | 1273  | 3445  | 1793  | 4986  | 2850  | 3830  | 2363  |
|                          | CL       | CL 12:0_28:0_28:0_28                                   | 745.5069  | [M-H] <sup>-</sup>                  | 5.978 | 2610  | 1406  | 751    | 1305  | 1589  | 1964  | 2192  | 1548  | 1852  | 1386  | 1319  | 2776  | 2280  | 1500  | 1677  | 2299  |
|                          | CL       | CL 16:0_28:0_28:0_28                                   | 899.73456 | [M-H] <sup>-</sup>                  | 9.406 | 2455  | 3682  | 1812   | 3509  | 2131  | 923   | 1668  | 1988  | 449   | 610   | 1048  | 382   | 2067  | 848   | 463   | 991   |
|                          | CL       | CL 28:0_16:2_28:0_28                                   | 927.7674  | [M-H] <sup>-</sup>                  | 9.58  | 3087  | 4025  | 2289   | 3573  | 2829  | 859   | 1801  | 2125  | 637   | 718   | 732   | 394   | 2066  | 775   | 327   | 505   |
|                          | CL       | CL 28:0_16:2_28:0_28                                   | 925.75024 | [M-H] <sup>-</sup>                  | 9.428 | 2021  | 3312  | 1998   | 2616  | 1571  | 474   | 1033  | 1258  | 413   | 502   | 730   | 287   | 1876  | 483   | 223   | 531   |
|                          | EtherLPC | LPC O-16:1                                             | 524.33282 | [M-H] <sup>-</sup>                  | 2.626 | 2259  | 133   | 244    | 158   | 159   | 323   | 174   | 499   | 355   | 269   | 351   | 2844  | 1181  | 1030  | 48    | 162   |

|           |                   |           |                |       |       |       |       |       |       |       |       |       |       |       |       |       |       |       |       |       |
|-----------|-------------------|-----------|----------------|-------|-------|-------|-------|-------|-------|-------|-------|-------|-------|-------|-------|-------|-------|-------|-------|-------|
| EtherLPC  | LPC O-16:2        | 522.3205  | [M-H]-         | 5.904 | 4505  | 3744  | 3832  | 4086  | 3722  | 2635  | 3107  | 5162  | 4785  | 2937  | 2846  | 4185  | 3851  | 4438  | 4396  | 4591  |
| EtherLPE  | LPE O-16:1        | 436.28152 | [M-H]-         | 2.753 | 6088  | 750   | 642   | 805   | 1879  | 3543  | 848   | 2154  | 1884  | 316   | 425   | 9468  | 5648  | 889   | 789   | 916   |
| EtherLPE  | LPE O-18:1        | 464.31262 | [M-H]-         | 3.741 | 17841 | 6354  | 5227  | 6889  | 4078  | 7883  | 6423  | 6762  | 5502  | 1970  | 2750  | 20212 | 10626 | 6500  | 2324  | 4156  |
| EtherLPE  | LPE O-18:2        | 462.29736 | [M-H]-         | 2.903 | 16387 | 4459  | 3242  | 3661  | 5399  | 8090  | 4078  | 7732  | 3594  | 314   | 2675  | 19222 | 14147 | 3392  | 2620  | 2975  |
| EtherLPE  | LPE O-18:4        | 460.27615 | [M+H]+         | 4.77  | 50421 | 54332 | 5248  | 21934 | 38325 | 50824 | 46268 | 37943 | 69832 | 13232 | 46707 | 62833 | 73687 | 42923 | 35553 | 29687 |
| LPE       | LPE 18:0          | 480.30887 | [M-H]-         | 3.313 | 25196 | 3555  | 5143  | 7334  | 4965  | 16529 | 7110  | 7869  | 5242  | 2596  | 2399  | 23972 | 20403 | 5647  | 2262  | 3398  |
| EtherLPG  | LPG O-18:1        | 495.30054 | [M-H]-         | 5.903 | 3014  | 2423  | 2642  | 2557  | 3138  | 2290  | 2505  | 3144  | 2960  | 2345  | 2665  | 2709  | 2264  | 2634  | 2849  | 2506  |
| EtherLPG  | LPG O-24:6        | 569.33289 | [M-H]-         | 9.707 | 2728  | 3201  | 1742  | 2654  | 2835  | 1134  | 1880  | 2063  | 199   | 271   | 753   | 326   | 1214  | 854   | 816   | 747   |
| LPI       | LPI 6:0           | 431.13831 | [M-H]-         | 5.023 | 5930  | 5849  | 5149  | 5033  | 5442  | 5011  | 4045  | 5128  | 6024  | 4463  | 4790  | 4893  | 4790  | 5838  | 5960  | 5104  |
| EtherOxPC | PC O-14:0_22:3;O2 | 846.5871  | [M-H]-         | 6.897 | 3462  | 4822  | 4047  | 5447  | 3673  | 3998  | 4385  | 2303  | 6140  | 3935  | 986   | 4034  | 3631  | 2552  | 3551  | 1903  |
| EtherOxPC | PC O-15:0_22:5;O2 | 856.57135 | [M-H]-         | 7.369 | 9802  | 9466  | 8990  | 10960 | 12314 | 9705  | 9355  | 8652  | 11716 | 9132  | 11427 | 10775 | 9313  | 7800  | 8975  | 8779  |
| EtherOxPC | PC O-15:0_22:5;O3 | 872.56171 | [M-H]-         | 7.369 | 9554  | 9411  | 11287 | 7220  | 8982  | 9002  | 8536  | 9191  | 7287  | 3564  | 9387  | 9043  | 9131  | 9692  | 8903  | 6313  |
| EtherOxPC | PC O-15:0_22:6;O2 | 854.55389 | [M-H]-         | 7.225 | 10467 | 14019 | 10931 | 13218 | 7700  | 5388  | 12365 | 10809 | 13370 | 10503 | 11364 | 11449 | 9598  | 9922  | 7563  | 6120  |
| EtherOxPC | PC O-17:0_22:6;O2 | 882.58496 | [M-H]-         | 7.793 | 5854  | 9978  | 1289  | 8329  | 4037  | 1655  | 934   | 671   | 6079  | 1352  | 10686 | 12005 | 3467  | 6115  | 1885  | 3083  |
| EtherOxPC | PC O-17:1_22:6;O2 | 880.56519 | [M-H]-         | 7.282 | 4497  | 4433  | 3759  | 6201  | 7599  | 1461  | 4287  | 7114  | 8173  | 7038  | 8572  | 3989  | 5947  | 8652  | 2004  | 2342  |
| EtherOxPC | PC O-17:2_22:6;O3 | 894.54419 | [M-H]-         | 6.521 | 5145  | 4721  | 2059  | 3929  | 3533  | 5795  | 4967  | 3791  | 6556  | 3724  | 4434  | 5006  | 5710  | 3907  | 4666  | 6088  |
| EtherOxPC | PC O-22:3_22:6;O4 | 978.59375 | [M-H]-         | 5.288 | 2280  | 1898  | 1816  | 1769  | 1884  | 1755  | 1655  | 1672  | 1945  | 1765  | 1726  | 1695  | 1584  | 1933  | 1933  | 1825  |
| EtherOxPC | PC O-8:0_9:0;O2   | 586.32727 | [M-H]-         | 5.03  | 4540  | 5132  | 2949  | 3819  | 4309  | 3960  | 4420  | 4027  | 4449  | 4277  | 3550  | 4399  | 4095  | 3203  | 3877  | 2046  |
| EtherOxPC | PC O-9:0_22:4;O4  | 790.49402 | [M-H]-         | 6.885 | 141   | 228   | 7421  | 3716  | 6223  | 79    | 276   | 65    | 729   | 566   | 637   | 350   | 192   | 329   | 4301  | 348   |
| OxPC      | PC 10:0_22:5;O4   | 848.44897 | [M-H]-         | 7.044 | 1159  | 1195  | 1620  | 288   | 1323  | 1202  | 363   | 1656  | 1619  | 594   | 1611  | 1611  | 1414  | 1572  | 1243  | 1005  |
| OxPC      | PC 14:0_18:1;O4   | 840.52618 | [M+FA-H]<br>]- | 7.546 | 1677  | 2238  | 1775  | 2007  | 1983  | 1921  | 2615  | 1780  | 2021  | 1745  | 2135  | 2406  | 2464  | 1830  | 1841  | 2745  |
| OxPC      | PC 14:0_22:6;O4   | 886.51135 | [M-H]-         | 6.909 | 167   | 347   | 6052  | 392   | 2469  | 129   | 1498  | 3784  | 975   | 1641  | 1751  | 1434  | 4997  | 3089  | 3809  | 3144  |
| OxPC      | PC 15:1_20:5;O3   | 856.50018 | [M-H]-         | 7.549 | 6883  | 8070  | 6141  | 6073  | 5686  | 5690  | 7726  | 5288  | 7358  | 5559  | 6446  | 7468  | 6950  | 5783  | 6315  | 6518  |
| OxPC      | PC 15:1_20:5;O4   | 872.4942  | [M+FA-H]<br>]- | 7.28  | 6866  | 6942  | 7439  | 7792  | 6491  | 8049  | 8814  | 6264  | 8120  | 7105  | 6574  | 7983  | 8441  | 6923  | 7395  | 9433  |
| OxPC      | PC 15:1_22:5;O4   | 916.52075 | [M-H]-         | 7.229 | 2718  | 3902  | 2714  | 4833  | 2871  | 1643  | 2833  | 2728  | 3076  | 2246  | 2783  | 2698  | 2590  | 3264  | 3133  | 2983  |
| OxPC      | PC 17:0_18:1;O4   | 882.57397 | [M-H]-         | 7.392 | 315   | 3389  | 2576  | 574   | 8345  | 413   | 673   | 6213  | 1901  | 1897  | 8024  | 4520  | 7028  | 3287  | 6908  | 5818  |
| EtherOxPE | PE O-12:0_17:1;O2 | 664.44983 | [M-H]-         | 4.196 | 1876  | 2650  | 1063  | 1556  | 2614  | 1240  | 1392  | 1346  | 1210  | 773   | 923   | 951   | 1744  | 1110  | 846   | 639   |
| EtherOxPE | PE O-16:0_22:3;O1 | 770.56927 | [M-H]-         | 7.516 | 23970 | 16994 | 10676 | 15236 | 12595 | 27816 | 20420 | 22594 | 18272 | 12505 | 26028 | 16480 | 21533 | 26270 | 19187 | 12291 |
| EtherOxPE | PE O-16:0_22:4;O2 | 784.54938 | [M-H]-         | 6.839 | 3818  | 1659  | 3008  | 4635  | 5164  | 4466  | 4416  | 4233  | 8209  | 2965  | 8334  | 3719  | 3732  | 4408  | 4341  | 4579  |
| EtherOxPE | PE O-16:0_28:0;O1 | 860.71173 | [M-H]-         | 9.383 | 5827  | 3195  | 1162  | 4602  | 1696  | 1193  | 4317  | 2914  | 69    | 234   | 583   | 60    | 229   | 125   | 131   | 163   |

|           |                          |           |                |       |            |        |        |        |        |        |        |        |        |        |        |        |        |        |        |        |
|-----------|--------------------------|-----------|----------------|-------|------------|--------|--------|--------|--------|--------|--------|--------|--------|--------|--------|--------|--------|--------|--------|--------|
| EtherOxPE | PE O-17:0_22:5;O2        | 796.5495  | [M-H]-         | 7.866 | 2096       | 2906   | 1575   | 980    | 1577   | 479    | 2241   | 2191   | 2073   | 1650   | 2209   | 1416   | 815    | 1988   | 1396   | 1129   |
| EtherOxPE | PE O-17:2_22:6;O3        | 806.49329 | [M-H]-         | 6.437 | 2082       | 1886   | 2305   | 1627   | 2209   | 2431   | 1815   | 1564   | 3431   | 2098   | 1720   | 2630   | 2859   | 1878   | 2283   | 2951   |
| EtherOxPE | PE O-18:0_18:1;O1        | 746.56677 | [M-H]-         | 6.648 | 28713      | 45446  | 46371  | 28556  | 0      | 227    | 0      | 31988  | 31871  | 55     | 31724  | 49726  | 48288  | 48003  | 0      | 0      |
| EtherOxPE | PE O-18:0_22:5;O2        | 810.56726 | [M-H]-         | 6.836 | 63935      | 56732  | 46323  | 44250  | 46583  | 22552  | 49756  | 42183  | 58255  | 44019  | 65652  | 66640  | 44575  | 74712  | 13473  | 23500  |
| EtherOxPE | PE O-18:0_28:0;O1        | 888.74341 | [M-H]-         | 9.571 | 12091      | 8102   | 3167   | 9321   | 4522   | 3371   | 8585   | 5345   | 721    | 1514   | 2539   | 864    | 3381   | 1602   | 1533   | 1766   |
| EtherOxPE | PE O-18:1_22:6;O1        | 790.5376  | [M-H]-         | 6.894 | 1196       | 1216   | 1402   | 809    | 774    | 1894   | 1852   | 924    | 1354   | 1261   | 965    | 3221   | 4103   | 2347   | 991    | 2030   |
| EtherOxPE | PE O-22:3_22:4;O2        | 862.59412 | [M-H]-         | 7.162 | 6349       | 3571   | 3939   | 4311   | 5603   | 2277   | 3607   | 5336   | 6264   | 3463   | 5394   | 5859   | 4767   | 6867   | 2318   | 2646   |
| EtherOxPE | PE O-24:0_20:5;O2        | 866.62671 | [M-H]-         | 7.727 | 5708       | 3170   | 1636   | 1900   | 5792   | 1038   | 2944   | 953    | 3833   | 2984   | 3466   | 2426   | 2504   | 2649   | 2330   | 1689   |
| EtherOxPE | PE O-26:0_17:0;O2        | 862.68536 | [M-H]-         | 9.283 | 4107       | 3863   | 3503   | 3494   | 3428   | 3507   | 3954   | 3621   | 3677   | 2477   | 3949   | 3816   | 3739   | 3293   | 2941   | 3001   |
| EtherOxPE | PE O-28:0_9:0;O2         | 778.59204 | [M-H]-         | 6.814 | 5645       | 3815   | 4077   | 4127   | 4321   | 4359   | 3412   | 3285   | 3538   | 4454   | 4999   | 4361   | 4064   | 3455   | 5325   | 3166   |
| EtherOxPE | PE O-8:0_28:0;O1         | 748.58484 | [M-H]-         | 6.604 | 1532       | 11018  | 12357  | 4902   | 0      | 11732  | 1858   | 25916  | 10172  | 3451   | 7655   | 15884  | 21350  | 20840  | 0      | 13383  |
| EtherOxPE | PE O-9:0_28:0;O1         | 762.60052 | [M-H]-         | 6.81  | 29385<br>6 | 294466 | 327696 | 302035 | 326160 | 313954 | 278544 | 316676 | 393595 | 286660 | 326058 | 297659 | 314755 | 309710 | 313132 | 304532 |
| OxPE      | PE 37:5;O PE 22:4_15:1;O | 766.50073 | [M-H]-         | 7.078 | 7039       | 8030   | 7822   | 8208   | 7115   | 7364   | 7043   | 7515   | 8976   | 4967   | 5829   | 6561   | 8895   | 5281   | 10324  | 8093   |
| OxPE      | PE 39:6;O PE 22:5_17:1;O | 792.51758 | [M-H]-         | 7.133 | 11326      | 14327  | 11137  | 12083  | 11260  | 10692  | 14675  | 9615   | 12019  | 8931   | 11512  | 11813  | 11658  | 7078   | 12486  | 13633  |
| OxPE      | PE 15:1_22:5;O4          | 828.47241 | [M-H]-         | 7.083 | 1175       | 2614   | 2022   | 2897   | 2755   | 3268   | 2884   | 2569   | 2450   | 1098   | 2169   | 2633   | 3108   | 872    | 2997   | 2879   |
| OxPE      | PE 18:3_22:5;O4          | 866.46924 | [M-H]-         | 7.194 | 2702       | 973    | 1557   | 647    | 890    | 2192   | 1573   | 680    | 1874   | 1595   | 1615   | 1943   | 1476   | 1604   | 1121   | 707    |
| OxPG      | PG 16:0_18:2;O1          | 761.50366 | [M-H]-         | 7.084 | 2994       | 1460   | 2851   | 3049   | 2973   | 3071   | 3484   | 2856   | 3795   | 1723   | 2260   | 3104   | 3882   | 1532   | 4161   | 3572   |
| OxPG      | PG 17:0_18:1;O3          | 809.51715 | [M-H]-         | 8.185 | 11353      | 10884  | 10738  | 11230  | 11518  | 10683  | 10621  | 11227  | 11455  | 10412  | 11792  | 11485  | 11231  | 11453  | 10980  | 10437  |
| OxPG      | PG 17:0_22:5;O3          | 857.51947 | [M-H]-         | 7.289 | 1035       | 1008   | 1406   | 2043   | 1401   | 1654   | 1483   | 1597   | 1610   | 1211   | 1110   | 1548   | 1369   | 2025   | 1720   | 2061   |
| OxPG      | PG 18:2_22:3;O4          | 887.53394 | [M-H]-         | 6.904 | 7030       | 3482   | 7518   | 4039   | 4042   | 3553   | 8226   | 3887   | 7933   | 8147   | 6266   | 5855   | 7375   | 6028   | 8228   | 3051   |
| OxPG      | PG 18:2_22:6;O1          | 833.50226 | [M-H]-         | 7.038 | 10732      | 12420  | 13024  | 10987  | 12531  | 11822  | 11792  | 14519  | 12973  | 12994  | 13434  | 12448  | 12197  | 15966  | 10364  | 11933  |
| OxPG      | PG 18:3_22:6;O1          | 831.49066 | [M-H]-         | 6.65  | 3786       | 4773   | 4718   | 3853   | 3210   | 3277   | 3148   | 3866   | 3951   | 3606   | 4662   | 4037   | 5254   | 4574   | 2880   | 3412   |
| OxPG      | PG 22:3_22:5;O4          | 953.54211 | [M-H]-         | 6.296 | 3675       | 1514   | 336    | 936    | 1773   | 1876   | 2169   | 1576   | 1291   | 1463   | 1301   | 2470   | 926    | 1413   | 460    | 274    |
| OxPG      | PG 26:0_20:5;O4          | 971.6217  | [M-H]-         | 6.829 | 3027       | 2298   | 306    | 1442   | 2255   | 2993   | 3061   | 1536   | 1694   | 2389   | 639    | 2544   | 112    | 131    | 1911   | 1708   |
| OxPG      | PG 8:0_3:0;O1            | 443.16757 | [M-H]-         | 3.439 | 3902       | 3693   | 3462   | 3188   | 3034   | 2593   | 2016   | 2502   | 3198   | 1632   | 2118   | 2956   | 4616   | 2311   | 2023   | 1871   |
| OxPI      | PI 15:0_16:0;O3          | 843.4798  | [M-H]-         | 7.287 | 2520       | 3094   | 3552   | 3348   | 3315   | 1901   | 3267   | 2959   | 4180   | 2287   | 1538   | 2941   | 3205   | 3735   | 1580   | 4164   |
| OxPI      | PI 16:0_22:3;O1          | 903.56439 | [M-H]-         | 5.03  | 2052       | 1770   | 1755   | 1689   | 1604   | 1772   | 1420   | 1736   | 2056   | 1338   | 1710   | 1602   | 1795   | 1956   | 1496   | 1230   |
| OxPS      | PS 16:1_22:6;O3          | 852.46838 | [M-H]-         | 6.989 | 3005       | 2630   | 2958   | 2776   | 2377   | 3176   | 2646   | 3311   | 3391   | 2668   | 2634   | 2821   | 2785   | 2259   | 2418   | 2864   |
| OxPS      | PS 18:1_22:6;O3          | 880.50128 | [M+FA-H]<br>]- | 7.456 | 4353       | 5542   | 5452   | 4289   | 4461   | 4527   | 4344   | 4652   | 5411   | 5255   | 5231   | 4934   | 4916   | 4521   | 3546   | 3358   |



|         |                             |           |               |       |              |              |              |              |              |              |              |              |              |              |              |              |              |              |              |              |
|---------|-----------------------------|-----------|---------------|-------|--------------|--------------|--------------|--------------|--------------|--------------|--------------|--------------|--------------|--------------|--------------|--------------|--------------|--------------|--------------|--------------|
| OxPS    | PS 18:1_22:6;O4             | 896.49866 | [M-H]-        | 7.198 | 5167         | 2498         | 4405         | 2537         | 2498         | 5421         | 3039         | 2047         | 3266         | 4306         | 3364         | 3123         | 3615         | 3072         | 3064         | 3159         |
| OxPS    | PS 18:2_22:6;O3             | 878.48456 | [M-H]-        | 7.037 | 3968         | 4347         | 4772         | 3935         | 3905         | 3991         | 4608         | 4705         | 3985         | 3892         | 4147         | 4183         | 4074         | 5262         | 3793         | 3841         |
| OxPS    | PS 22:3_22:6;O2             | 916.53613 | [M-H]-        | 6.906 | 4761         | 5798         | 4177         | 5736         | 2469         | 3480         | 6232         | 5046         | 6449         | 4974         | 5541         | 6332         | 3083         | 6157         | 5988         | 6229         |
| OxPS    | PS 22:6_7:0;O1              | 696.34625 | [M-H]-        | 7.076 | 1669         | 1765         | 1885         | 1783         | 1753         | 2185         | 1602         | 1800         | 2454         | 1220         | 1710         | 2243         | 2629         | 1525         | 2866         | 2402         |
| PA      | PA 10:0_28:2                | 727.52814 | [M-H]-        | 6.877 | 621          | 188          | 243          | 97           | 323          | 10625        | 117          | 607          | 158          | 220          | 330          | 685          | 1363         | 169          | 172          | 7503         |
| PA      | PA 15:0_28:7                | 787.52777 | [M-H]-        | 7.118 | 1418         | 3200         | 3064         | 2639         | 2979         | 1463         | 2727         | 1899         | 2072         | 2254         | 2965         | 851          | 2474         | 754          | 3123         | 3238         |
| PA      | PA 15:2_28:7                | 783.49127 | [M-H]-        | 7.082 | 11293        | 12165        | 11215        | 13029        | 11574        | 13206        | 11570        | 11755        | 12938        | 9378         | 10449        | 12456        | 12979        | 8046         | 14238        | 13696        |
| PA      | PA 17:0_28:3                | 823.62488 | [M-H]-        | 6.449 | 3695         | 18906        | 4370         | 8714         | 10651        | 11534        | 2672         | 17772        | 3673         | 5228         | 18144        | 16146        | 17417        | 2803         | 9021         | 8862         |
| PA      | PA 19:0_28:7                | 843.5932  | [M+FA-H]<br>- | 6.441 | 24403        | 21078        | 32771        | 68373        | 39391        | 38769        | 40444        | 70529        | 48096        | 69644        | 34891        | 37658        | 40902        | 32425        | 24661        | 44366        |
| PA      | PA 19:4_28:7                | 835.52063 | [M-H]-        | 7.454 | 13622        | 16490        | 19126        | 16967        | 17337        | 14531        | 14916        | 18221        | 18918        | 19523        | 17523        | 16922        | 15490        | 18471        | 14639        | 16416        |
| PA      | PA 22:0_28:5                | 889.6698  | [M-H]-        | 8.113 | 231          | 1494         | 411          | 1587         | 797          | 119          | 428          | 3454         | 624          | 817          | 1493         | 577          | 328          | 1604         | 663          | 1834         |
| PA      | PA 22:0_28:6                | 887.65552 | [M-H]-        | 7.75  | 336          | 1593         | 158          | 1335         | 737          | 413          | 458          | 2835         | 586          | 645          | 1125         | 319          | 70           | 1296         | 674          | 1757         |
| PA      | PA 8:0_26:6                 | 663.40997 | [M-H]-        | 4.021 | 2046         | 2400         | 2271         | 1111         | 1514         | 2044         | 2263         | 2077         | 2476         | 1592         | 2023         | 2034         | 2380         | 2148         | 1825         | 2010         |
| PA      | PA 8:0_28:1                 | 701.51263 | [M-H]-        | 6.75  | 74           | 30           | 30           | 55           | 81           | 4504         | 79           | 51           | 37           | 66           | 78           | 120          | 694          | 91           | 64           | 2335         |
| EtherPC | PC O-30:0                   | 692.55139 | [M+H]+        | 4.798 | 17189        | 37050        | 25962        | 14869        | 60367        | 65774        | 23868        | 34026        | 35082        | 25691        | 53411        | 32929        | 36883        | 33613        | 23354        | 58985        |
| EtherPC | PC O-32:0 PC<br>O-16:0_16:0 | 720.58582 | [M+H]+        | 5.58  | 27923<br>0   | 304477       | 309890       | 237230       | 437942       | 535526       | 110106       | 390538       | 447716       | 221937       | 375625       | 302013       | 399995       | 319284       | 257425       | 381605       |
| EtherPC | PC O-32:1 PC<br>O-16:1_16:0 | 718.56757 | [M+H]+        | 5.366 | 17362<br>9   | 236408       | 48037        | 134832       | 226936       | 149536       | 164464       | 272583       | 286996       | 130661       | 283067       | 274578       | 286077       | 316189       | 193902       | 123476       |
| EtherPC | PC O-32:3                   | 714.53955 | [M+H]+        | 4.135 | 49330        | 72527        | 57188        | 34985        | 68134        | 49205        | 35054        | 81131        | 104429       | 42129        | 102313       | 108151       | 148691       | 157047       | 61262        | 59814        |
| EtherPC | PC O-33:2 PC<br>O-15:0_18:2 | 730.56854 | [M+H]+        | 4.645 | 40573<br>2   | 350788       | 235441       | 299375       | 617053       | 541553       | 364836       | 405414       | 616442       | 328302       | 588342       | 625288       | 616904       | 495466       | 468731       | 524095       |
| EtherPC | PC O-33:3 PC<br>O-15:1_18:2 | 728.55194 | [M+H]+        | 4.453 | 13701<br>9   | 239579       | 133560       | 76507        | 215546       | 105438       | 132993       | 202239       | 179972       | 132677       | 182888       | 307618       | 148715       | 427374       | 99417        | 130104       |
| EtherPC | PC O-34:1                   | 746.60352 | [M+H]+        | 6.311 | 30753        | 20936        | 2731404      | 19111        | 28337        | 29157        | 18445        | 20939        | 8161         | 19788        | 29290        | 7623         | 13350        | 4052         | 45458        | 15193        |
| EtherPC | PC O-34:1 PC<br>O-16:0_18:1 | 790.59967 | [M+HCO<br>O]- | 7.883 | 18224<br>4   | 74900        | 65895        | 39858        | 112699       | 95122        | 69884        | 55144        | 85589        | 57865        | 82447        | 68577        | 36299        | 27447        | 61305        | 50058        |
| EtherPC | PC O-34:1 PC<br>O-18:1_16:0 | 746.60559 | [M+H]+        | 5.591 | 79067<br>94  | 3041470      | 11092        | 1272947      | 2583322      | 4667156      | 2289582      | 2800041      | 3940346      | 2095263      | 3005330      | 2942184      | 2904788      | 2229696      | 3114148      | 1216837      |
| EtherPC | PC O-34:2 PC<br>O-16:0_18:2 | 744.57947 | [M+H]+        | 4.987 | 42674<br>412 | 4055545<br>2 | 2512117<br>2 | 3256213<br>6 | 5983409<br>6 | 5054696<br>8 | 2707356<br>8 | 3817010<br>8 | 4761809<br>6 | 2997271<br>8 | 5864496<br>0 | 5043939<br>2 | 4650578<br>8 | 3647166<br>8 | 4069660<br>4 | 3774100<br>4 |
| EtherPC | PC O-34:2 PC<br>O-16:1_18:1 | 744.59015 | [M+H]+        | 5.434 | 15624<br>641 | 6585264      | 5606965      | 1896486      | 4820188      | 3374900      | 3982953      | 4091352      | 3846188      | 2092077      | 7195657      | 1946700      | 4581506      | 5901026      | 2870262      | 660070       |
| EtherPC | PC O-34:3 PC<br>O-16:1_18:2 | 742.5741  | [M+H]+        | 4.815 | 53092<br>772 | 5793798<br>8 | 248655       | 4933187<br>6 | 5382698<br>8 | 4286028<br>4 | 4797744<br>4 | 6335925<br>2 | 8490780<br>0 | 4505161<br>6 | 7217342<br>4 | 7731207<br>2 | 7216121<br>6 | 7142798<br>4 | 3788305<br>2 | 4640079<br>6 |
| EtherPC | PC O-34:4 PC<br>O-18:4_16:0 | 740.5528  | [M+H]+        | 4.348 | 10111<br>5   | 131132       | 3653         | 137128       | 201502       | 192609       | 47966        | 170572       | 274242       | 133087       | 283461       | 259808       | 172230       | 369999       | 184601       | 216876       |
| EtherPC | PC O-34:6                   | 736.51068 | [M+H]+        | 5.337 | 37033        | 31397        | 9956         | 33663        | 33982        | 35826        | 34639        | 34507        | 42614        | 33289        | 29930        | 41660        | 4506         | 3921         | 39305        | 3355         |
| EtherPC | PC O-35:2 PC<br>O-17:0_18:2 | 758.59521 | [M+H]+        | 5.338 | 29020<br>8   | 373626       | 539812       | 186489       | 633687       | 362088       | 140562       | 354299       | 588180       | 375252       | 478564       | 555871       | 833080       | 304272       | 241412       | 440791       |
| EtherPC | PC O-35:3 PC<br>O-17:1_18:2 | 756.58673 | [M+H]+        | 5.173 | 17191<br>38  | 1695778      | 203518       | 927995       | 1449754      | 1557340      | 827447       | 830528       | 1713235      | 543470       | 2354288      | 1124988      | 1796221      | 2885386      | 855733       | 542842       |

|         |                          |           |                       |       |          |          |          |          |          |          |          |          |          |          |          |          |          |          |          |          |
|---------|--------------------------|-----------|-----------------------|-------|----------|----------|----------|----------|----------|----------|----------|----------|----------|----------|----------|----------|----------|----------|----------|----------|
| EtherPC | PC O-35:4 PC O-17:2_18:2 | 754.56647 | [M+H] <sup>+</sup>    | 4.52  | 115220   | 55726    | 150662   | 102867   | 57117    | 16994    | 142140   | 17233    | 128528   | 20908    | 93065    | 163768   | 198278   | 143639   | 79466    | 149710   |
| EtherPC | PC O-35:5 PC O-15:1_20:4 | 752.55548 | [M+H] <sup>+</sup>    | 4.726 | 288124   | 397045   | 321604   | 493513   | 571633   | 755807   | 197579   | 432232   | 513792   | 338930   | 618756   | 385552   | 573665   | 85957    | 753114   | 611515   |
| EtherPC | PC O-35:6 PC O-15:4_20:2 | 794.5329  | [M+HCOO] <sup>-</sup> | 7.549 | 13108    | 20698    | 12002    | 14568    | 13997    | 11947    | 15978    | 13555    | 15294    | 11372    | 13825    | 18217    | 15351    | 15017    | 13892    | 13058    |
| EtherPC | PC O-35:7                | 748.5199  | [M+H] <sup>+</sup>    | 4.768 | 109340   | 118386   | 57981    | 111869   | 111210   | 120978   | 129895   | 73551    | 97498    | 98222    | 108044   | 109710   | 113774   | 63610    | 142580   | 128852   |
| EtherPC | PC O-35:8                | 746.50409 | [M+H] <sup>+</sup>    | 4.514 | 27808    | 14218    | 1001     | 51856    | 3618     | 53657    | 50842    | 64171    | 54437    | 58568    | 54272    | 64527    | 49115    | 47504    | 44381    | 1660     |
| EtherPC | PC O-36:1                | 774.62915 | [M+H] <sup>+</sup>    | 6.436 | 239290   | 61431    | 17249    | 43873    | 170065   | 120012   | 20374    | 107058   | 44093    | 76792    | 143765   | 98212    | 71660    | 119972   | 113405   | 27699    |
| EtherPC | PC O-36:2                | 772.62085 | [M+H] <sup>+</sup>    | 6.883 | 1383707  | 26860    | 14563    | 31095    | 51673    | 33625    | 34508    | 32321    | 31701    | 16163    | 49911    | 48884    | 37128    | 34808    | 41939    | 16425    |
| EtherPC | PC O-36:2 PC O-17:1_19:1 | 772.60974 | [M+H] <sup>+</sup>    | 2.319 | 15166    | 11819    | 13203    | 13982    | 16689    | 11387    | 13351    | 29475    | 19369    | 10975    | 13806    | 13612    | 12602    | 20526    | 21265    | 24824    |
| EtherPC | PC O-36:2 PC O-18:0_18:2 | 772.61957 | [M+H] <sup>+</sup>    | 5.825 | 5324654  | 2762933  | 2542747  | 2396481  | 6819338  | 4018266  | 2282546  | 3123103  | 4059076  | 1997644  | 4714104  | 3323778  | 4093675  | 3257757  | 2024099  | 2437380  |
| EtherPC | PC O-36:3 PC O-18:1_18:2 | 770.60376 | [M+H] <sup>+</sup>    | 5.05  | 20119942 | 18208008 | 64446519 | 12963748 | 28327828 | 14852994 | 12422897 | 16900212 | 20987742 | 12615865 | 23009252 | 23242166 | 19961368 | 17499914 | 13279801 | 13752126 |
| EtherPC | PC O-36:4                | 768.58289 | [M+H] <sup>+</sup>    | 5.527 | 360687   | 60526    | 15857993 | 85928    | 298070   | 206614   | 38404    | 55534    | 73543    | 63061    | 138824   | 151895   | 51792    | 68813    | 55020    | 53653    |
| EtherPC | PC O-36:4 PC O-18:2_18:2 | 812.58344 | [M+HCOO] <sup>-</sup> | 7.255 | 370606   | 364014   | 292606   | 254413   | 308383   | 186540   | 318001   | 351089   | 372408   | 284656   | 451984   | 410469   | 135458   | 449170   | 135350   | 185983   |
| EtherPC | PC O-36:4 PC O-18:4_18:0 | 768.58276 | [M+H] <sup>+</sup>    | 4.87  | 26596928 | 23200890 | 21541195 | 14134115 | 27150694 | 13346036 | 18076886 | 24940384 | 28836774 | 20770826 | 34293400 | 31792262 | 23953074 | 35431056 | 10202273 | 14515627 |
| EtherPC | PC O-36:5 PC O-16:1_20:4 | 766.57397 | [M+H] <sup>+</sup>    | 4.657 | 7364462  | 5596150  | 2931354  | 4815373  | 6413192  | 3684388  | 3304715  | 9090747  | 7929306  | 55412534 | 10559254 | 8588333  | 5036850  | 12530551 | 2450884  | 3092264  |
| EtherPC | PC O-36:5 PC O-18:3_18:2 | 810.56531 | [M+HCOO] <sup>-</sup> | 6.515 | 6890     | 7436     | 8466     | 11270    | 10079    | 12391    | 6489     | 6579     | 10148    | 5089     | 10159    | 11471    | 13509    | 9655     | 10057    | 11027    |
| EtherPC | PC O-36:5 PC O-18:4_18:1 | 766.57257 | [M+H] <sup>+</sup>    | 4.351 | 3913770  | 4046650  | 7429058  | 2764126  | 3640637  | 1498484  | 2890946  | 3127207  | 4079808  | 3196410  | 5052202  | 5004446  | 3947564  | 5684486  | 803436   | 1628828  |
| EtherPC | PC O-36:6 PC O-18:4_18:2 | 764.55017 | [M+H] <sup>+</sup>    | 4.811 | 514968   | 590284   | 8661     | 627215   | 545340   | 512829   | 597231   | 599306   | 617606   | 585323   | 623197   | 623587   | 623219   | 335127   | 531457   | 591587   |
| EtherPC | PC O-36:8                | 760.5213  | [M+H] <sup>+</sup>    | 5.303 | 570      | 1344     | 507      | 527      | 1144     | 1908     | 965      | 1047     | 510      | 1247     | 1017     | 509      | 764      | 498      | 557      | 0        |
| EtherPC | PC O-36:9 PC O-18:4_18:5 | 758.50751 | [M+H] <sup>+</sup>    | 4.49  | 1513     | 757      | 0        | 1452     | 5239     | 1010     | 1008     | 2805     | 505      | 11037    | 4561     | 7615     | 6700     | 757      | 1261     | 6182     |
| EtherPC | PC O-37:1                | 788.66217 | [M+H] <sup>+</sup>    | 6.495 | 8301     | 14322    | 4546     | 5692     | 3643     | 20166    | 2612     | 31118    | 14960    | 8720     | 20654    | 10283    | 9884     | 26296    | 12319    | 5662     |
| EtherPC | PC O-37:10               | 770.51495 | [M+H] <sup>+</sup>    | 4.711 | 1014     | 2348     | 3189     | 1145     | 1678     | 2045     | 2352     | 1166     | 3707     | 3933     | 2506     | 2938     | 1264     | 979      | 4915     | 1288     |
| EtherPC | PC O-37:2                | 786.64752 | [M+H] <sup>+</sup>    | 6.911 | 17042    | 66167    | 38914    | 3521     | 38664    | 2172     | 2586     | 58108    | 4684     | 2514     | 3137     | 4321     | 2183     | 3362     | 6846     | 2513     |
| EtherPC | PC O-37:5                | 780.58081 | [M+H] <sup>+</sup>    | 4.906 | 68719    | 13853    | 0        | 136563   | 108472   | 44863    | 17929    | 77178    | 72902    | 83548    | 77231    | 104561   | 132966   | 166025   | 7606     | 22480    |
| EtherPC | PC O-37:5 PC O-18:1_19:4 | 780.58478 | [M+H] <sup>+</sup>    | 4.987 | 75959    | 98879    | 0        | 124852   | 72780    | 108840   | 29200    | 163152   | 50623    | 186175   | 217998   | 139601   | 106541   | 145629   | 41649    | 75541    |
| EtherPC | PC O-37:6 PC O-18:4_19:2 | 778.5675  | [M+H] <sup>+</sup>    | 4.428 | 19127    | 29775    | 4362     | 7207     | 5062     | 2015     | 2748     | 27645    | 40243    | 16888    | 6289     | 31228    | 40424    | 43060    | 105491   | 5490     |
| EtherPC | PC O-37:7 PC O-18:3_19:4 | 776.55341 | [M+H] <sup>+</sup>    | 5.056 | 10014    | 81328    | 260701   | 86940    | 80810    | 90649    | 57972    | 93202    | 113549   | 68883    | 120084   | 110553   | 134248   | 127143   | 97359    | 85961    |
| EtherPC | PC O-37:8                | 774.53424 | [M+H] <sup>+</sup>    | 5.219 | 137169   | 143650   | 109736   | 127467   | 125007   | 117575   | 103379   | 146605   | 118408   | 130034   | 127820   | 128188   | 140425   | 159106   | 106095   | 95028    |
| EtherPC | PC O-37:8 PC O-15:2_22:6 | 774.53857 | [M+H] <sup>+</sup>    | 4.467 | 62734    | 86039    | 28742    | 96433    | 83575    | 54279    | 80040    | 99058    | 124971   | 90897    | 119843   | 111130   | 114928   | 125275   | 124756   | 106211   |

|         |                          |           |                    |       |             |         |         |         |         |         |         |         |         |         |         |         |         |         |         |         |
|---------|--------------------------|-----------|--------------------|-------|-------------|---------|---------|---------|---------|---------|---------|---------|---------|---------|---------|---------|---------|---------|---------|---------|
| EtherPC | PC O-37:9                | 772.52905 | [M+H] <sup>+</sup> | 4.764 | 2626        | 65713   | 4006    | 19964   | 9742    | 61172   | 32265   | 75090   | 31557   | 4179    | 40344   | 47902   | 63650   | 67638   | 5581    | 21974   |
| EtherPC | PC O-37:9 PC O-18:4_19:5 | 772.52203 | [M+H] <sup>+</sup> | 4.664 | 80326       | 61046   | 1300    | 66409   | 9742    | 12977   | 18535   | 66335   | 82844   | 60762   | 49754   | 46315   | 37048   | 69729   | 49289   | 33630   |
| EtherPC | PC O-38:3 PC O-18:2_20:1 | 798.63007 | [M+H] <sup>+</sup> | 5.801 | 16076<br>3  | 86336   | 11259   | 44732   | 150754  | 85358   | 19018   | 106446  | 79845   | 94053   | 110404  | 182210  | 173160  | 144746  | 60926   | 73287   |
| EtherPC | PC O-38:4 PC O-18:1_20:3 | 796.61481 | [M+H] <sup>+</sup> | 5.213 | 12391<br>2  | 194328  | 46325   | 217371  | 421046  | 219509  | 124547  | 260204  | 158328  | 214962  | 308198  | 106759  | 220176  | 278315  | 268271  | 154447  |
| EtherPC | PC O-38:4 PC O-18:2_20:2 | 796.61182 | [M+H] <sup>+</sup> | 5.336 | 41729<br>9  | 270813  | 364422  | 114800  | 509127  | 236427  | 182223  | 264139  | 251028  | 194668  | 428882  | 476234  | 295370  | 406708  | 218026  | 161276  |
| EtherPC | PC O-38:5                | 794.60022 | [M+H] <sup>+</sup> | 5.375 | 93468<br>8  | 711247  | 1918142 | 452662  | 850665  | 152899  | 374782  | 354626  | 759314  | 688154  | 1212906 | 883608  | 591309  | 1640698 | 131000  | 322423  |
| EtherPC | PC O-38:5 PC O-18:1_20:4 | 794.59937 | [M+H] <sup>+</sup> | 5.063 | 65113<br>4  | 254957  | 16779   | 222905  | 301004  | 571597  | 216130  | 565304  | 156051  | 606393  | 876821  | 665440  | 150691  | 817146  | 148381  | 1502308 |
| EtherPC | PC O-38:5 PC O-18:4_20:1 | 794.60272 | [M+H] <sup>+</sup> | 4.841 | 24925<br>80 | 1724680 | 19508   | 1546319 | 3791660 | 1996708 | 984826  | 2402423 | 2305411 | 2069042 | 3050974 | 2591067 | 1772841 | 3315660 | 1381099 | 1342984 |
| EtherPC | PC O-38:6 PC O-17:1_21:5 | 792.58398 | [M+H] <sup>+</sup> | 5.584 | 25084<br>8  | 165328  | 226012  | 95388   | 225872  | 119548  | 110665  | 200297  | 197813  | 152282  | 322928  | 314574  | 246710  | 336660  | 79641   | 134268  |
| EtherPC | PC O-38:6 PC O-18:2_20:4 | 792.5882  | [M+H] <sup>+</sup> | 4.713 | 28222<br>22 | 2130424 | 394975  | 1600776 | 2583244 | 1425532 | 1409185 | 3745495 | 3192671 | 2674581 | 4242052 | 3548706 | 2081478 | 5432756 | 930650  | 1220926 |
| EtherPC | PC O-38:6 PC O-18:4_20:2 | 792.58551 | [M+H] <sup>+</sup> | 4.3   | 35175<br>0  | 351587  | 955     | 279094  | 476495  | 124062  | 144017  | 371050  | 322931  | 259269  | 547478  | 417575  | 394897  | 588723  | 165077  | 176599  |
| EtherPC | PC O-38:7 PC O-18:3_20:4 | 790.57184 | [M+H] <sup>+</sup> | 4.178 | 39048<br>0  | 313115  | 370767  | 209285  | 297876  | 129862  | 154422  | 400212  | 330980  | 341660  | 630736  | 482880  | 282849  | 933038  | 36282   | 133794  |
| EtherPC | PC O-38:7 PC O-18:4_20:3 | 790.56256 | [M+H] <sup>+</sup> | 4.882 | 31385<br>7  | 276190  | 125900  | 235409  | 303148  | 64316   | 265562  | 290077  | 283584  | 185362  | 237645  | 286354  | 191048  | 347150  | 155186  | 205284  |
| EtherPC | PC O-38:8                | 788.5509  | [M+H] <sup>+</sup> | 4.665 | 13341<br>4  | 125290  | 194298  | 123069  | 101295  | 92110   | 92573   | 176218  | 90222   | 148105  | 193811  | 160785  | 109058  | 162404  | 32978   | 23548   |
| EtherPC | PC O-38:8 PC O-18:3_20:5 | 788.55096 | [M+H] <sup>+</sup> | 4.391 | 67945       | 91168   | 121044  | 70582   | 103032  | 77919   | 69820   | 84200   | 71581   | 74661   | 99545   | 119394  | 98249   | 118467  | 32978   | 72070   |
| EtherPC | PC O-39:10               | 798.53149 | [M+H] <sup>+</sup> | 5.027 | 31554       | 71250   | 31596   | 33137   | 22672   | 24290   | 26476   | 34575   | 20762   | 19915   | 34434   | 54065   | 31277   | 36096   | 40004   | 25855   |
| EtherPC | PC O-39:2                | 814.6712  | [M+H] <sup>+</sup> | 6.966 | 17979       | 82474   | 5252    | 149516  | 213484  | 42195   | 186175  | 219066  | 37813   | 167220  | 61747   | 129807  | 79714   | 39975   | 17899   | 2643    |
| EtherPC | PC O-39:3                | 812.65112 | [M+H] <sup>+</sup> | 7.489 | 28398       | 25656   | 24115   | 18880   | 27115   | 50237   | 20994   | 26794   | 46799   | 28845   | 30249   | 77977   | 38095   | 34386   | 53205   | 46690   |
| EtherPC | PC O-40:11               | 810.53827 | [M+H] <sup>+</sup> | 4.862 | 1765        | 4975    | 9260    | 7279    | 9430    | 2763    | 3107    | 4056    | 4499    | 7037    | 4281    | 8180    | 7939    | 4536    | 2740    | 4975    |
| EtherPC | PC O-40:2                | 828.68701 | [M+H] <sup>+</sup> | 7.302 | 22239<br>8  | 184049  | 19341   | 188098  | 201158  | 216326  | 211159  | 197045  | 264195  | 208750  | 197242  | 219748  | 195712  | 201362  | 195801  | 220744  |
| EtherPC | PC O-40:5 PC O-18:1_22:4 | 822.63025 | [M+H] <sup>+</sup> | 5.662 | 13354<br>4  | 73120   | 108763  | 45554   | 134604  | 48152   | 12982   | 110141  | 128947  | 99628   | 15657   | 14350   | 53447   | 36159   | 12956   | 77852   |
| EtherPC | PC O-40:6 PC O-18:2_22:4 | 820.61322 | [M+H] <sup>+</sup> | 4.89  | 23647<br>2  | 131153  | 1699    | 190704  | 297649  | 170596  | 130880  | 201862  | 213773  | 177846  | 217569  | 157165  | 210481  | 244493  | 188188  | 174857  |
| EtherPC | PC O-40:7 PC O-18:2_22:5 | 818.60132 | [M+H] <sup>+</sup> | 4.756 | 23730<br>3  | 135931  | 124255  | 141615  | 234654  | 136820  | 104338  | 192096  | 266948  | 203460  | 243778  | 253617  | 189986  | 312688  | 98388   | 34477   |
| EtherPC | PC O-40:8                | 816.58514 | [M+H] <sup>+</sup> | 4.436 | 20538       | 6495    | 5744    | 4527    | 7777    | 3526    | 25595   | 17295   | 55588   | 3964    | 10062   | 16852   | 5667    | 63407   | 2496    | 1475    |
| EtherPC | PC O-40:9                | 814.5675  | [M+H] <sup>+</sup> | 4.725 | 64048       | 41376   | 69277   | 37258   | 58653   | 28307   | 38904   | 74830   | 62304   | 69599   | 91025   | 68304   | 43957   | 92481   | 27773   | 29194   |
| EtherPC | PC O-41:11               | 824.55115 | [M+H] <sup>+</sup> | 5.189 | 94355       | 86417   | 82989   | 119495  | 141753  | 187981  | 82089   | 105993  | 163430  | 105710  | 165936  | 111155  | 144792  | 89739   | 201455  | 119659  |
| EtherPC | PC O-11:0_28:7           | 848.58563 | [M-H] <sup>-</sup> | 7.506 | 13316       | 18109   | 6578    | 22388   | 6608    | 9766    | 7443    | 25854   | 6701    | 5933    | 25788   | 24074   | 13799   | 28613   | 7992    | 20740   |
| EtherPC | PC O-15:2_22:6           | 818.52667 | [M-H] <sup>-</sup> | 7.455 | 11769       | 13259   | 14481   | 13955   | 13691   | 12228   | 13261   | 14025   | 13860   | 13945   | 16789   | 13498   | 13638   | 17060   | 9902    | 11029   |

|         |                         |            |               |       |               |               |               |               |               |               |               |               |               |               |               |               |               |               |               |               |
|---------|-------------------------|------------|---------------|-------|---------------|---------------|---------------|---------------|---------------|---------------|---------------|---------------|---------------|---------------|---------------|---------------|---------------|---------------|---------------|---------------|
| EtherPC | PC O-15:3_22:6          | 816.5127   | [M-H]-        | 7.038 | 12335         | 11465         | 12399         | 10535         | 10862         | 10184         | 10033         | 12249         | 12296         | 10730         | 12727         | 11802         | 10727         | 12032         | 9535          | 9988          |
| EtherPC | PC O-15:4_22:6          | 814.50281  | [M-H]-        | 6.649 | 3314          | 3453          | 3748          | 3014          | 2448          | 2492          | 2488          | 3140          | 3298          | 2609          | 2773          | 3215          | 3818          | 3764          | 1674          | 1685          |
| EtherPC | PC O-21:0_28:1          | 1000.83032 | [M-H]-        | 7.976 | 4225          | 3842          | 3721          | 3620          | 3911          | 3627          | 3820          | 3214          | 3482          | 3553          | 4161          | 3512          | 1727          | 4099          | 3542          | 3105          |
| EtherPC | PC O-23:0_28:1          | 1028.85901 | [M-H]-        | 8.071 | 16817         | 17074         | 17556         | 16977         | 17670         | 16733         | 16491         | 17062         | 18298         | 17440         | 19524         | 17864         | 17039         | 19255         | 19470         | 18327         |
| EtherPC | PC O-9:0_26:2           | 802.59058  | [M-H]-        | 7.709 | 15262         | 3294          | 0             | 3817          | 14247         | 17686         | 11812         | 0             | 8639          | 2196          | 6987          | 18436         | 0             | 0             | 0             | 0             |
| EtherPC | PC O-9:0_28:5           | 824.57507  | [M-H]-        | 7.32  | 3782          | 2069          | 2395          | 2798          | 5841          | 1406          | 943           | 2711          | 2737          | 4321          | 3232          | 4371          | 1546          | 9880          | 998           | 1389          |
| EtherPC | PC O-9:0_28:7           | 820.54285  | [M-H]-        | 7.447 | 423           | 1110          | 2011          | 1576          | 2805          | 982           | 884           | 1388          | 1300          | 2099          | 1947          | 1571          | 1859          | 2275          | 965           | 1799          |
| PC      | PC 30:0                 | 706.53662  | [M+H]+        | 4.239 | 18401<br>1    | 217592        | 250142        | 146799        | 231712        | 350021        | 138616        | 407011        | 238322        | 164815        | 278937        | 310687        | 672871        | 417634        | 364999        | 365588        |
| PC      | PC 31:0                 | 720.54663  | [M+H]+        | 4.599 | 53044         | 65238         | 82143         | 64185         | 58816         | 87470         | 55113         | 156433        | 75737         | 53299         | 145294        | 125989        | 188435        | 91014         | 74050         | 126472        |
| PC      | PC 32:0 PC<br>16:0_16:0 | 734.56659  | [M+H]+        | 4.93  | 13740<br>65   | 1997190       | 5485          | 1545989       | 1993873       | 2648950       | 1231646       | 3062322       | 1981062       | 1598718       | 2440986       | 2307035       | 4218965       | 3579708       | 1950626       | 2404687       |
| PC      | PC 32:1                 | 776.5448   | [M+HCO<br>O]- | 6.825 | 26033         | 28860         | 38469         | 20723         | 26201         | 33255         | 22698         | 31113         | 27905         | 17395         | 22186         | 26970         | 31962         | 27220         | 38395         | 29627         |
| PC      | PC 32:1 PC<br>16:0_16:1 | 732.552    | [M+H]+        | 4.329 | 96773<br>9    | 1306545       | 2487727       | 809364        | 1256320       | 1754013       | 807565        | 1513121       | 1257362       | 681410        | 997702        | 1152124       | 1759710       | 1196789       | 2400843       | 1461213       |
| PC      | PC 32:2 PC<br>16:1_16:1 | 730.53766  | [M+H]+        | 3.754 | 48142<br>7    | 902566        | 943970        | 669283        | 934606        | 1126732       | 631308        | 1235047       | 1232822       | 807954        | 1114281       | 1251834       | 2096741       | 1355904       | 1826045       | 1552367       |
| PC      | PC 32:3                 | 772.52582  | [M+HCO<br>O]- | 6.677 | 7571          | 6765          | 8670          | 8983          | 5637          | 8410          | 6718          | 6140          | 8340          | 6703          | 6807          | 8901          | 14070         | 8606          | 6746          | 8720          |
| PC      | PC 33:1                 | 746.56378  | [M+H]+        | 4.663 | 16641<br>3    | 94387         | 104415        | 99645         | 257876        | 374365        | 174390        | 264035        | 277242        | 157691        | 254663        | 270086        | 329057        | 256133        | 483433        | 421222        |
| PC      | PC 33:2 PC<br>15:0_18:2 | 744.55328  | [M+H]+        | 4.114 | 26931<br>9    | 521473        | 460864        | 451225        | 711322        | 850961        | 589255        | 850610        | 1083861       | 758157        | 910965        | 1096306       | 1429364       | 799697        | 1217939       | 1541730       |
| PC      | PC 33:3 PC<br>15:1_18:2 | 742.5379   | [M+H]+        | 4.41  | 39511<br>8    | 353938        | 710540        | 336037        | 284406        | 527450        | 369415        | 405639        | 517458        | 403311        | 327068        | 747980        | 685637        | 449566        | 710427        | 697797        |
| PC      | PC 33:5                 | 782.49231  | [M+HCO<br>O]- | 6.787 | 1723          | 1702          | 2676          | 2035          | 2317          | 2002          | 1588          | 1909          | 2574          | 2047          | 1869          | 2330          | 3031          | 2203          | 2413          | 2715          |
| PC      | PC 34:0 PC<br>16:0_18:0 | 762.59747  | [M+H]+        | 5.742 | 36905<br>8    | 391445        | 499918        | 296440        | 414290        | 558116        | 261110        | 630617        | 493601        | 303271        | 599358        | 550514        | 757829        | 910253        | 396695        | 454564        |
| PC      | PC 34:1                 | 804.56818  | [M+HCO<br>O]- | 7.599 | 8180          | 29916         | 15136         | 79499         | 288645        | 81405         | 69669         | 3311          | 5567          | 3293          | 5753          | 162731        | 9768          | 3429          | 335433        | 377175        |
| PC      | PC 34:1 PC<br>16:0_18:1 | 760.58618  | [M+H]+        | 4.987 | 19225<br>684  | 1839782<br>4  | 2206165<br>2  | 8323874       | 1777561<br>6  | 1980483<br>0  | 1108284<br>8  | 2031289<br>2  | 1939928<br>4  | 1421247<br>0  | 1907776<br>8  | 1918125<br>2  | 2346150<br>2  | 2328614<br>8  | 2684079<br>4  | 1765794<br>0  |
| PC      | PC 34:2                 | 780.54724  | [M+Na]+       | 4.42  | 64942<br>6    | 855244        | 52397         | 1105364       | 768109        | 695640        | 772519        | 1053233       | 976682        | 840847        | 880182        | 1011817       | 767729        | 896341        | 1053447       | 950331        |
| PC      | PC 34:2 PC<br>16:0_18:2 | 758.57135  | [M+H]+        | 4.418 | 12372<br>4968 | 2046404<br>48 | 1924031<br>36 | 1638806<br>24 | 1789558<br>56 | 1752368<br>00 | 1521268<br>96 | 2112937<br>12 | 2428370<br>40 | 1804622<br>72 | 2108608<br>00 | 2295231<br>04 | 2557788<br>48 | 2175835<br>68 | 2150830<br>72 | 2184107<br>04 |
| PC      | PC 34:3                 | 756.55206  | [M+H]+        | 4.292 | 15094         | 17093         | 3913299       | 12121         | 19676         | 21653         | 22917         | 17849         | 14117         | 20666         | 14911         | 11636         | 21927         | 26651         | 34219         | 26653         |
| PC      | PC 34:3 PC<br>16:1_18:2 | 756.55261  | [M+H]+        | 3.848 | 11832<br>57   | 2392895       | 1092          | 1428131       | 1754248       | 1681548       | 1217828       | 2018714       | 2693014       | 584244        | 2290251       | 1844648       | 3628642       | 1198178       | 2223034       | 3970701       |
| PC      | PC 34:4                 | 754.53467  | [M+H]+        | 3.583 | 16421         | 16381         | 22753         | 14227         | 19007         | 27894         | 9692          | 23341         | 27371         | 21880         | 25937         | 26013         | 39174         | 13110         | 29403         | 32754         |
| PC      | PC 34:9                 | 744.46521  | [M+H]+        | 7.047 | 19312         | 17516         | 24822         | 17892         | 24426         | 18775         | 17330         | 22251         | 28991         | 25063         | 28202         | 26977         | 30598         | 24211         | 23578         | 29428         |
| PC      | PC 35:1                 | 774.59338  | [M+H]+        | 5.379 | 20782<br>0    | 91787         | 17957         | 75341         | 178622        | 288979        | 97383         | 232276        | 238763        | 167589        | 224396        | 255008        | 277580        | 154102        | 303951        | 274241        |

|    |                         |           |                           |       |              |         |         |         |         |              |         |              |              |         |         |              |              |              |              |              |
|----|-------------------------|-----------|---------------------------|-------|--------------|---------|---------|---------|---------|--------------|---------|--------------|--------------|---------|---------|--------------|--------------|--------------|--------------|--------------|
| PC | PC 35:2                 | 816.57513 | [M+HCO<br>O] <sub>-</sub> | 7.211 | 19418        | 29288   | 19610   | 27645   | 27634   | 30771        | 41161   | 29240        | 37505        | 27231   | 32974   | 38508        | 40331        | 33776        | 39904        | 44282        |
| PC | PC 35:2 PC<br>17:0_18:2 | 772.58209 | [M+H] <sub>+</sub>        | 4.791 | 88696<br>3   | 1208891 | 787844  | 1001825 | 1347073 | 757166       | 1571848 | 1411605      | 1801477      | 1292525 | 1592158 | 1770957      | 2206120      | 1698754      | 2008087      | 2343608      |
| PC | PC 35:3                 | 770.56525 | [M+H] <sub>+</sub>        | 4.19  | 95062        | 145411  | 109721  | 95624   | 140355  | 228063       | 146227  | 136861       | 213335       | 99535   | 165786  | 186022       | 234530       | 152271       | 329149       | 372476       |
| PC | PC 35:5                 | 766.55151 | [M+H] <sub>+</sub>        | 4.984 | 17233<br>7   | 203665  | 0       | 245261  | 114277  | 182449       | 296095  | 180699       | 429603       | 229510  | 186785  | 145965       | 299945       | 264552       | 223796       | 178336       |
| PC | PC 36:1                 | 832.60809 | [M+HCO<br>O] <sub>-</sub> | 8.005 | 10975<br>6   | 58812   | 52985   | 38155   | 66339   | 77798        | 59857   | 63527        | 68603        | 48266   | 85765   | 73120        | 71634        | 95808        | 59647        | 57354        |
| PC | PC 36:1 PC<br>18:0_18:1 | 788.61554 | [M+H] <sub>+</sub>        | 5.774 | 41360<br>39  | 2230516 | 2250126 | 1380227 | 2680384 | 3653564      | 1808205 | 3435418      | 2851600      | 1888466 | 3669790 | 2976830      | 3086440      | 4255644      | 3114408      | 2319217      |
| PC | PC 36:2                 | 808.57776 | [M+Na] <sub>+</sub>       | 5.151 | 58675<br>1   | 685906  | 310832  | 573419  | 609818  | 810819       | 535338  | 883011       | 706540       | 312434  | 616518  | 516455       | 614269       | 643732       | 561039       | 778457       |
| PC | PC 36:2 PC<br>18:0_18:2 | 786.59991 | [M+H] <sub>+</sub>        | 5.194 | 59993<br>576 | 4276028 | 2565922 | 3330575 | 3093323 | 5530114      | 3078854 | 5708259      | 4300796      | 1710665 | 6919692 | 5359214      | 6450114      | 7449025      | 4585894      | 3983335      |
| PC | PC 36:3                 | 828.57611 | [M+HCO<br>O] <sub>-</sub> | 6.977 | 22238<br>0   | 193553  | 183067  | 145872  | 180250  | 230355       | 169839  | 215331       | 244980       | 152505  | 208136  | 272682       | 269619       | 263143       | 286360       | 247066       |
| PC | PC 36:3 PC<br>18:1_18:2 | 784.58264 | [M+H] <sub>+</sub>        | 4.522 | 79658<br>39  | 7491392 | 8038902 | 4904762 | 7381938 | 1014811<br>5 | 5281668 | 1050317<br>6 | 1168624<br>8 | 6118355 | 8834677 | 1202729<br>0 | 1320586<br>7 | 1461993<br>6 | 1301559<br>6 | 1084430<br>6 |
| PC | PC 36:4                 | 804.54694 | [M+Na] <sub>+</sub>       | 3.96  | 13814<br>3   | 122465  | 845     | 84526   | 102883  | 175704       | 101568  | 139767       | 214202       | 108905  | 157587  | 240118       | 367455       | 217846       | 256654       | 299529       |
| PC | PC 36:4 PC<br>16:0_20:4 | 782.56915 | [M+H] <sub>+</sub>        | 4.292 | 36812<br>92  | 2528015 | 6726018 | 2567792 | 2850886 | 5256394      | 2423657 | 4393810      | 3501042      | 2744868 | 3420206 | 4061246      | 4254370      | 3603140      | 3735538      | 4002854      |
| PC | PC 36:4 PC<br>18:2_18:2 | 782.56854 | [M+H] <sub>+</sub>        | 3.957 | 71822<br>82  | 6136104 | 974     | 6818336 | 6978789 | 1161036<br>7 | 7707217 | 7970096      | 1277012<br>2 | 7116062 | 8412785 | 1148074<br>3 | 1550130<br>4 | 1041637<br>6 | 1191216<br>9 | 1290407<br>8 |
| PC | PC 36:5 PC<br>18:2_18:3 | 780.55231 | [M+H] <sub>+</sub>        | 3.499 | 92729        | 101637  | 88145   | 68654   | 88725   | 508385       | 67329   | 95725        | 285408       | 124504  | 139478  | 244123       | 208645       | 255870       | 518013       | 572073       |
| PC | PC 37:2 PC<br>19:0_18:2 | 800.61212 | [M+H] <sub>+</sub>        | 5.583 | 29289<br>8   | 191361  | 112691  | 130919  | 148172  | 335002       | 194787  | 295533       | 195442       | 148358  | 354810  | 258690       | 396875       | 380801       | 324239       | 285206       |
| PC | PC 37:3                 | 798.59302 | [M+H] <sub>+</sub>        | 4.854 | 42123        | 35951   | 3027    | 10987   | 26065   | 35595        | 30352   | 29557        | 19569        | 22197   | 76291   | 19167        | 38631        | 44754        | 89316        | 85785        |
| PC | PC 38:2                 | 814.62958 | [M+H] <sub>+</sub>        | 5.945 | 28626<br>0   | 112667  | 131498  | 52076   | 180504  | 179976       | 116196  | 205284       | 179398       | 130790  | 208118  | 214123       | 292540       | 208700       | 245826       | 172966       |
| PC | PC 38:3                 | 812.6134  | [M+H] <sub>+</sub>        | 5.354 | 25990<br>8   | 106092  | 231818  | 136481  | 168156  | 313062       | 165950  | 327442       | 153992       | 130236  | 306972  | 230033       | 368854       | 342496       | 146704       | 218966       |
| PC | PC 38:3 PC<br>20:1_18:2 | 812.60986 | [M+H] <sub>+</sub>        | 5.197 | 37397<br>6   | 104740  | 151372  | 114662  | 220284  | 361427       | 163923  | 272695       | 147948       | 172915  | 274678  | 214036       | 385001       | 380988       | 276738       | 232945       |
| PC | PC 38:4                 | 810.59357 | [M+H] <sub>+</sub>        | 4.628 | 40074<br>0   | 278666  | 10273   | 231542  | 157089  | 532818       | 198972  | 244565       | 204539       | 179820  | 175283  | 407112       | 755175       | 565852       | 372308       | 342690       |
| PC | PC 38:4 PC<br>18:0_20:4 | 810.59619 | [M+H] <sub>+</sub>        | 5     | 87468<br>4   | 441204  | 271181  | 519964  | 551262  | 1004202      | 412787  | 835905       | 601579       | 616959  | 986961  | 647235       | 793288       | 834147       | 483071       | 529985       |
| PC | PC 38:5                 | 808.58301 | [M+H] <sub>+</sub>        | 4.333 | 37771<br>5   | 206936  | 1448    | 200688  | 254622  | 525677       | 189494  | 343466       | 278339       | 259036  | 303479  | 399895       | 397409       | 346994       | 488242       | 386589       |
| PC | PC 38:6                 | 806.56689 | [M+H] <sub>+</sub>        | 4.512 | 16970<br>0   | 141541  | 262603  | 109851  | 212935  | 176128       | 88903   | 107807       | 93319        | 89903   | 192364  | 276963       | 101516       | 266560       | 305451       | 252723       |
| PC | PC 38:6 PC<br>18:2_20:4 | 806.56812 | [M+H] <sub>+</sub>        | 3.807 | 50467<br>9   | 251209  | 165     | 190259  | 199586  | 485525       | 165435  | 327050       | 319541       | 206858  | 325983  | 401695       | 383757       | 324586       | 339534       | 405438       |
| PC | PC 38:7                 | 804.547   | [M+H] <sub>+</sub>        | 4.349 | 62868        | 54594   | 138924  | 47978   | 51828   | 73167        | 36721   | 81742        | 64765        | 43541   | 78732   | 9136         | 90230        | 64021        | 62672        | 80703        |
| PC | PC 38:8                 | 802.54559 | [M+H] <sub>+</sub>        | 4.387 | 2905         | 2391    | 1577    | 1886    | 2992    | 2180         | 4359    | 1329         | 2956         | 1841    | 4434    | 1661         | 3494         | 3062         | 5970         | 3504         |
| PC | PC 40:10                | 826.53296 | [M+H] <sub>+</sub>        | 4.471 | 12176        | 5866    | 704     | 18986   | 20304   | 4469         | 5648    | 11071        | 9304         | 6988    | 10425   | 7311         | 4942         | 29987        | 14571        | 11020        |

|         |                          |            |                    |       |             |         |        |        |        |        |         |        |         |        |         |         |         |        |        |        |
|---------|--------------------------|------------|--------------------|-------|-------------|---------|--------|--------|--------|--------|---------|--------|---------|--------|---------|---------|---------|--------|--------|--------|
| PC      | PC 40:5                  | 836.61102  | [M+H] <sup>+</sup> | 5.104 | 71131       | 8391    | 35443  | 15489  | 10077  | 62160  | 15701   | 11256  | 8959    | 14909  | 11456   | 15206   | 65755   | 7656   | 21704  | 45451  |
| PC      | PC 40:6                  | 834.59631  | [M+H] <sup>+</sup> | 4.397 | 39710       | 16772   | 978    | 28551  | 20883  | 16263  | 10253   | 20174  | 30454   | 33726  | 28874   | 27796   | 43606   | 35303  | 40106  | 21717  |
| PC      | PC 42:10                 | 854.56366  | [M+H] <sup>+</sup> | 5.164 | 8237        | 3546    | 476    | 3421   | 5687   | 5023   | 7181    | 3810   | 5949    | 4938   | 3044    | 10163   | 17118   | 6201   | 3225   | 3698   |
| PC      | PC 15:4_24:6             | 856.51947  | [M-H] <sup>-</sup> | 7.288 | 1481        | 555     | 1011   | 837    | 1470   | 1399   | 887     | 1492   | 2655    | 1792   | 1515    | 1574    | 2967    | 1634   | 2551   | 2264   |
| PC      | PC 44:0_7:0              | 1044.85583 | [M-H] <sup>-</sup> | 6.984 | 22630<br>9  | 252375  | 254173 | 244064 | 252051 | 255760 | 243004  | 242595 | 241887  | 258784 | 254766  | 257567  | 239218  | 252820 | 266473 | 240381 |
| EtherPE | PE O-32:1 PE O-16:1_16:0 | 674.51398  | [M-H] <sup>-</sup> | 7.4   | 5944        | 5874    | 3601   | 4467   | 3627   | 7281   | 4939    | 5622   | 5085    | 3166   | 4744    | 5401    | 6802    | 4886   | 3584   | 5779   |
| EtherPE | PE O-32:2                | 674.50684  | [M+H] <sup>+</sup> | 4.591 | 20396       | 11550   | 14257  | 7818   | 22153  | 34959  | 14792   | 29320  | 11227   | 9143   | 14596   | 9788    | 22583   | 9106   | 25082  | 22957  |
| EtherPE | PE O-32:2 PE O-16:1_16:1 | 672.49188  | [M-H] <sup>-</sup> | 6.972 | 2794        | 3282    | 2474   | 2972   | 3170   | 4571   | 3385    | 4052   | 1204    | 1579   | 2502    | 2508    | 2896    | 2334   | 4540   | 3161   |
| EtherPE | PE O-33:3 PE O-15:1_18:2 | 684.49304  | [M-H] <sup>-</sup> | 6.855 | 2778        | 3302    | 1303   | 2903   | 1819   | 4561   | 3756    | 3805   | 4668    | 1109   | 3601    | 4661    | 6707    | 2833   | 6241   | 5451   |
| EtherPE | PE O-34:1                | 704.55365  | [M+H] <sup>+</sup> | 5.275 | 13231<br>2  | 125350  | 13090  | 60414  | 144497 | 173286 | 79855   | 106004 | 122257  | 83417  | 102140  | 132388  | 150372  | 125850 | 145687 | 151360 |
| EtherPE | PE O-34:1 PE O-18:1_16:0 | 702.54095  | [M-H] <sup>-</sup> | 7.801 | 7766        | 4091    | 101    | 2578   | 2217   | 6488   | 5994    | 213    | 4442    | 1329   | 20375   | 6754    | 6483    | 3913   | 253    | 4596   |
| EtherPE | PE O-34:2 PE O-16:1_18:1 | 700.53101  | [M-H] <sup>-</sup> | 7.436 | 14040<br>1  | 125233  | 76482  | 67617  | 91330  | 109110 | 87869   | 95284  | 90424   | 51605  | 88587   | 81000   | 92380   | 82769  | 104698 | 83997  |
| EtherPE | PE O-34:3 PE O-16:1_18:2 | 698.51361  | [M-H] <sup>-</sup> | 7.081 | 48266<br>2  | 499614  | 493169 | 476441 | 454273 | 618605 | 477507  | 472418 | 643299  | 310355 | 410414  | 580419  | 684224  | 315908 | 741203 | 623224 |
| EtherPE | PE O-34:4                | 698.50684  | [M+H] <sup>+</sup> | 4.441 | 6157        | 702     | 15638  | 6923   | 3583   | 4211   | 2326    | 1884   | 22226   | 591    | 2549    | 2918    | 18158   | 1265   | 32946  | 30240  |
| EtherPE | PE O-34:4 PE O-16:2_18:2 | 696.49445  | [M-H] <sup>-</sup> | 6.731 | 4112        | 2784    | 4074   | 4196   | 5124   | 8772   | 3577    | 3511   | 6995    | 3334   | 3883    | 4818    | 4392    | 3268   | 10072  | 8675   |
| EtherPE | PE O-34:5 PE O-14:1_20:4 | 694.47906  | [M-H] <sup>-</sup> | 6.469 | 1774        | 1440    | 1543   | 1255   | 1409   | 2063   | 855     | 1835   | 1683    | 1092   | 1675    | 1639    | 2377    | 1806   | 2109   | 1545   |
| EtherPE | PE O-35:1                | 718.56537  | [M+H] <sup>+</sup> | 4.892 | 74290       | 42462   | 1762   | 33969  | 88107  | 124577 | 87033   | 64836  | 56473   | 21912  | 38180   | 18527   | 38807   | 12087  | 79706  | 69500  |
| EtherPE | PE O-35:2                | 716.55591  | [M+H] <sup>+</sup> | 4.675 | 81669       | 95074   | 84595  | 11663  | 38265  | 58103  | 25286   | 70522  | 47514   | 12674  | 65117   | 31712   | 62094   | 35026  | 48089  | 17368  |
| EtherPE | PE O-35:2 PE O-17:1_18:1 | 714.54364  | [M-H] <sup>-</sup> | 7.652 | 7771        | 8982    | 3414   | 3857   | 7046   | 6759   | 5722    | 5367   | 4480    | 2880   | 6709    | 3349    | 4169    | 7038   | 6256   | 5197   |
| EtherPE | PE O-35:3 PE O-17:1_18:2 | 712.52808  | [M-H] <sup>-</sup> | 7.322 | 42658       | 43986   | 29819  | 38819  | 39395  | 48503  | 50942   | 33510  | 44620   | 26493  | 41078   | 48215   | 55051   | 33583  | 59458  | 52317  |
| EtherPE | PE O-35:4                | 712.51947  | [M+H] <sup>+</sup> | 4.496 | 6471        | 8774    | 20188  | 17502  | 16859  | 10184  | 9453    | 4544   | 28303   | 7865   | 9458    | 21859   | 12025   | 5807   | 27686  | 38457  |
| EtherPE | PE O-35:5 PE O-15:1_20:4 | 708.49817  | [M-H] <sup>-</sup> | 6.729 | 1354        | 1343    | 1515   | 1264   | 1494   | 3100   | 1310    | 1995   | 2851    | 1428   | 2069    | 2406    | 2912    | 2248   | 2350   | 3313   |
| EtherPE | PE O-36:2                | 730.56274  | [M+H] <sup>+</sup> | 5.249 | 9424        | 480598  | 19113  | 6269   | 460887 | 9763   | 10240   | 357364 | 20958   | 12007  | 502735  | 507643  | 14653   | 396904 | 455140 | 369577 |
| EtherPE | PE O-36:2 PE O-18:1_18:1 | 728.56305  | [M-H] <sup>-</sup> | 7.862 | 60525       | 72599   | 30359  | 26916  | 44646  | 32600  | 37693   | 38236  | 37031   | 24701  | 46705   | 30969   | 33911   | 44130  | 39536  | 28243  |
| EtherPE | PE O-36:3 PE O-18:1_18:2 | 726.54639  | [M-H] <sup>-</sup> | 7.542 | 10128<br>05 | 1228495 | 866392 | 910027 | 976992 | 842789 | 1016312 | 837639 | 1104427 | 727785 | 1129184 | 1211981 | 1270964 | 942770 | 971219 | 915633 |
| EtherPE | PE O-36:4 PE O-18:2_18:2 | 724.53125  | [M-H] <sup>-</sup> | 7.128 | 75575<br>6  | 945326  | 772856 | 737063 | 795395 | 766087 | 958332  | 793095 | 998109  | 573839 | 916920  | 1027271 | 1077189 | 758955 | 925038 | 921644 |
| EtherPE | PE O-36:5 PE O-16:1_20:4 | 722.51495  | [M-H] <sup>-</sup> | 6.986 | 42829<br>9  | 404180  | 509453 | 384065 | 412922 | 509167 | 293708  | 501550 | 538135  | 328589 | 415565  | 502163  | 528967  | 393477 | 469191 | 443446 |
| EtherPE | PE O-36:5 PE O-18:3_18:2 | 722.51294  | [M-H] <sup>-</sup> | 6.742 | 13246<br>1  | 194410  | 142530 | 147513 | 105372 | 87999  | 156726  | 95960  | 154037  | 87411  | 136760  | 157720  | 221677  | 113284 | 80672  | 124060 |

|         |                          |           |                    |       |             |         |         |         |         |         |         |         |         |         |         |         |         |         |         |         |
|---------|--------------------------|-----------|--------------------|-------|-------------|---------|---------|---------|---------|---------|---------|---------|---------|---------|---------|---------|---------|---------|---------|---------|
| EtherPE | PE O-36:6                | 722.50586 | [M+H] <sup>+</sup> | 4.727 | 88105       | 84111   | 63133   | 84418   | 82878   | 123129  | 86318   | 78874   | 94148   | 67405   | 64781   | 92922   | 104537  | 54793   | 140607  | 110255  |
| EtherPE | PE O-36:6 PE O-16:1_20:5 | 720.49561 | [M-H] <sup>-</sup> | 6.647 | 3644        | 3074    | 4789    | 5367    | 3552    | 12865   | 2633    | 5035    | 5060    | 3722    | 4060    | 5381    | 7712    | 4330    | 14908   | 10218   |
| EtherPE | PE O-36:6 PE O-18:4_18:2 | 720.49493 | [M-H] <sup>-</sup> | 6.372 | 2608        | 2460    | 3802    | 4173    | 3064    | 5550    | 3083    | 2122    | 3938    | 2174    | 2905    | 3984    | 6214    | 2864    | 5923    | 6279    |
| EtherPE | PE O-37:1 PE O-19:0_18:1 | 744.5838  | [M-H] <sup>-</sup> | 7.619 | 2080        | 1540    | 353     | 1902    | 386     | 374     | 1140    | 1154    | 1045    | 501     | 378     | 400     | 478     | 441     | 1313    | 942     |
| EtherPE | PE O-37:5                | 738.53931 | [M+H] <sup>+</sup> | 4.003 | 9439        | 17452   | 279     | 3331    | 14719   | 2221    | 5753    | 23752   | 18608   | 12100   | 23503   | 26003   | 14241   | 40357   | 3466    | 6402    |
| EtherPE | PE O-37:6 PE O-17:2_20:4 | 734.50861 | [M-H] <sup>-</sup> | 6.872 | 1141        | 1639    | 1929    | 1656    | 2166    | 3188    | 1795    | 2315    | 2590    | 1819    | 2637    | 2166    | 3861    | 2814    | 4267    | 4187    |
| EtherPE | PE O-38:3 PE O-18:1_20:2 | 754.57837 | [M-H] <sup>-</sup> | 7.919 | 31456       | 21510   | 13503   | 14847   | 21920   | 18681   | 17656   | 17758   | 19735   | 15389   | 21472   | 25256   | 24368   | 24587   | 15879   | 16517   |
| EtherPE | PE O-38:3 PE O-20:1_18:2 | 754.57404 | [M-H] <sup>-</sup> | 7.399 | 14256       | 11599   | 9976    | 10907   | 17104   | 11589   | 9707    | 7784    | 15432   | 9192    | 14448   | 10974   | 11627   | 9753    | 6215    | 10173   |
| EtherPE | PE O-38:4 PE O-18:1_20:3 | 752.55969 | [M-H] <sup>-</sup> | 7.66  | 57287       | 60291   | 49026   | 57984   | 62288   | 71954   | 48923   | 64204   | 60310   | 47655   | 76299   | 64159   | 83767   | 80280   | 66183   | 58894   |
| EtherPE | PE O-38:5 PE O-16:1_22:4 | 750.5451  | [M-H] <sup>-</sup> | 7.321 | 71911       | 51084   | 53037   | 49100   | 57853   | 105151  | 54580   | 38619   | 58945   | 36784   | 49815   | 35507   | 57031   | 52624   | 97811   | 45842   |
| EtherPE | PE O-38:5 PE O-18:1_20:4 | 750.54492 | [M-H] <sup>-</sup> | 7.451 | 85578<br>7  | 899948  | 884198  | 704523  | 795539  | 713579  | 629224  | 859666  | 935549  | 775742  | 1073870 | 971093  | 937041  | 1146788 | 586599  | 662405  |
| EtherPE | PE O-38:6 PE O-18:2_20:4 | 748.53271 | [M-H] <sup>-</sup> | 7.032 | 58408<br>3  | 653481  | 720661  | 515388  | 604484  | 591785  | 537529  | 751674  | 767329  | 561134  | 779474  | 752783  | 772823  | 822867  | 564815  | 626203  |
| EtherPE | PE O-38:6 PE O-18:3_20:3 | 748.52594 | [M-H] <sup>-</sup> | 6.822 | 9540        | 14410   | 12713   | 12309   | 11615   | 783     | 10059   | 9394    | 3774    | 5555    | 4969    | 1538    | 22949   | 3000    | 7131    | 6273    |
| EtherPE | PE O-38:6 PE O-20:5_18:1 | 748.52606 | [M-H] <sup>-</sup> | 6.35  | 3924        | 2489    | 4796    | 2447    | 3882    | 3011    | 3021    | 3354    | 3979    | 2827    | 2304    | 4784    | 3378    | 2173    | 2740    | 2882    |
| EtherPE | PE O-40:4 PE O-18:0_22:4 | 780.58746 | [M-H] <sup>-</sup> | 7.824 | 6756        | 8427    | 5059    | 6531    | 8247    | 6278    | 5610    | 5332    | 7463    | 8124    | 13755   | 2801    | 4987    | 4744    | 6414    | 3092    |
| EtherPE | PE O-40:5 PE O-18:1_22:4 | 778.57745 | [M-H] <sup>-</sup> | 7.751 | 67022       | 46823   | 35373   | 40267   | 52012   | 38748   | 47104   | 32736   | 47065   | 42937   | 44263   | 37297   | 39933   | 39787   | 33599   | 29247   |
| EtherPE | PE O-40:6                | 778.56714 | [M+H] <sup>+</sup> | 5.105 | 14349<br>0  | 102405  | 9544    | 89135   | 152302  | 140572  | 100010  | 108534  | 148683  | 126099  | 138315  | 125258  | 147667  | 117343  | 132205  | 134873  |
| EtherPE | PE O-40:6 PE O-18:1_22:5 | 776.5575  | [M-H] <sup>-</sup> | 7.459 | 56736       | 41544   | 47539   | 57599   | 19919   | 65455   | 46778   | 47043   | 60996   | 49091   | 52694   | 64015   | 73517   | 16312   | 63155   | 56292   |
| EtherPE | PE O-40:7 PE O-18:2_22:5 | 774.54761 | [M-H] <sup>-</sup> | 7.06  | 44002       | 31127   | 40550   | 38906   | 36347   | 51134   | 39240   | 36444   | 48696   | 35037   | 41853   | 52836   | 59020   | 47412   | 49866   | 46606   |
| EtherPE | PE O-40:8 PE O-18:2_22:6 | 772.52625 | [M-H] <sup>-</sup> | 6.892 | 16035       | 21148   | 18838   | 19336   | 15688   | 17750   | 17487   | 23145   | 27569   | 12780   | 22360   | 24103   | 32861   | 27652   | 22973   | 21268   |
| EtherPE | PE P-32:0 PE P-18:0_14:0 | 676.52032 | [M+H] <sup>+</sup> | 5.148 | 25176       | 32174   | 4320    | 25541   | 21343   | 38252   | 4571    | 29425   | 19142   | 10710   | 28996   | 34330   | 39669   | 30288   | 7283    | 33684   |
| EtherPE | PE P-34:1 PE P-16:0_18:1 | 702.54095 | [M+H] <sup>+</sup> | 5.206 | 44315<br>0  | 300496  | 202770  | 159119  | 298531  | 412341  | 155563  | 391769  | 320346  | 151730  | 368969  | 320562  | 397753  | 348896  | 379020  | 224314  |
| EtherPE | PE P-34:2 PE P-16:0_18:2 | 700.52667 | [M+H] <sup>+</sup> | 4.71  | 24206<br>92 | 2656714 | 583     | 2123063 | 2526116 | 3705656 | 2000319 | 2642736 | 3509299 | 1439133 | 2289095 | 3244676 | 4173165 | 1582000 | 4494673 | 3601555 |
| EtherPE | PE P-35:1 PE P-18:0_17:1 | 716.55627 | [M+H] <sup>+</sup> | 5.539 | 15616       | 19256   | 20078   | 20149   | 17255   | 8164    | 16958   | 21494   | 22885   | 8413    | 26165   | 3006    | 24021   | 28163   | 32921   | 17602   |
| EtherPE | PE P-35:2 PE P-17:0_18:2 | 714.53705 | [M+H] <sup>+</sup> | 5.046 | 13871<br>1  | 184085  | 141314  | 167223  | 153260  | 236654  | 241118  | 163501  | 220669  | 144006  | 188584  | 228245  | 284942  | 158038  | 272736  | 228452  |
| EtherPE | PE P-36:1 PE P-18:0_18:1 | 730.57306 | [M+H] <sup>+</sup> | 5.824 | 17940<br>2  | 230648  | 112867  | 85568   | 167368  | 114493  | 104083  | 153768  | 132158  | 91652   | 173958  | 119640  | 128014  | 174096  | 150560  | 99829   |
| EtherPE | PE P-36:2 PE P-18:0_18:2 | 728.55743 | [M+H] <sup>+</sup> | 5.359 | 44346<br>72 | 6499956 | 4613842 | 4164461 | 5609804 | 4405904 | 4472072 | 3973138 | 5907325 | 3669541 | 5994360 | 6701528 | 7275238 | 4961805 | 4770182 | 4748569 |



|         |                          |           |                    |       |             |         |         |         |         |         |         |         |         |         |         |         |         |         |         |         |
|---------|--------------------------|-----------|--------------------|-------|-------------|---------|---------|---------|---------|---------|---------|---------|---------|---------|---------|---------|---------|---------|---------|---------|
| EtherPE | PE P-36:3 PE P-18:1_18:2 | 726.54108 | [M+H] <sup>+</sup> | 4.758 | 31737<br>02 | 4525632 | 12507   | 2968806 | 4200464 | 4216840 | 4276723 | 3887344 | 4564128 | 2717358 | 4541226 | 4695108 | 5778906 | 3434800 | 4975137 | 4839092 |
| EtherPE | PE P-36:4 PE P-16:0_20:4 | 724.52527 | [M+H] <sup>+</sup> | 4.586 | 16571<br>08 | 1583556 | 568215  | 1383595 | 1893522 | 2393018 | 900479  | 2264774 | 2366402 | 1375826 | 1799196 | 2147397 | 2331482 | 1752538 | 2007581 | 1843675 |
| EtherPE | PE P-36:4 PE P-18:2_18:2 | 724.52667 | [M+H] <sup>+</sup> | 4.261 | 52735<br>7  | 924243  | 761     | 658067  | 562660  | 438641  | 640702  | 498969  | 804701  | 440571  | 693849  | 832060  | 1252311 | 601027  | 419147  | 617751  |
| EtherPE | PE P-37:4 PE P-17:0_20:4 | 738.53668 | [M+H] <sup>+</sup> | 4.911 | 12845<br>4  | 136962  | 57410   | 129244  | 124702  | 177871  | 98798   | 161813  | 173726  | 68534   | 176394  | 173589  | 169395  | 188728  | 179492  | 174733  |
| EtherPE | PE P-38:3 PE P-18:0_20:3 | 754.57172 | [M+H] <sup>+</sup> | 5.532 | 19874<br>2  | 218409  | 184198  | 184197  | 257383  | 275108  | 145313  | 265765  | 213585  | 185079  | 309215  | 249866  | 337263  | 328840  | 246283  | 220190  |
| EtherPE | PE P-38:4 PE P-18:0_20:4 | 752.55701 | [M+H] <sup>+</sup> | 5.228 | 30000<br>44 | 3567248 | 727541  | 2506995 | 3764918 | 2836180 | 1986392 | 3724647 | 3919748 | 3484668 | 4831745 | 4211226 | 3927024 | 5309648 | 2201102 | 2646167 |
| EtherPE | PE P-38:5 PE P-18:1_20:4 | 750.5426  | [M+H] <sup>+</sup> | 4.652 | 32298<br>37 | 3397988 | 97722   | 2424526 | 3905875 | 3811834 | 2385709 | 4169901 | 4281662 | 2928582 | 4799751 | 4599520 | 4704280 | 4716484 | 3600461 | 3782531 |
| EtherPE | PE P-38:6 PE P-18:2_20:4 | 748.52667 | [M+H] <sup>+</sup> | 4.141 | 34941<br>6  | 516710  | 5758    | 374375  | 349367  | 333486  | 252557  | 447970  | 453327  | 387092  | 544161  | 530521  | 758722  | 624354  | 279933  | 373723  |
| EtherPE | PE P-40:4 PE P-18:0_22:4 | 780.58612 | [M+H] <sup>+</sup> | 5.644 | 18836<br>2  | 130298  | 127773  | 106499  | 188803  | 151547  | 118249  | 133056  | 162722  | 133051  | 169363  | 144300  | 134798  | 161620  | 144967  | 113157  |
| EtherPE | PE P-40:5 PE P-18:0_22:5 | 778.56744 | [M+H] <sup>+</sup> | 5.262 | 28536<br>8  | 239305  | 280438  | 288676  | 311799  | 366995  | 208474  | 292586  | 357783  | 300018  | 324593  | 392891  | 446971  | 417699  | 370236  | 327687  |
| EtherPE | PE P-40:6 PE P-18:1_22:5 | 776.5528  | [M+H] <sup>+</sup> | 4.671 | 22228<br>5  | 210271  | 12288   | 225318  | 246039  | 340092  | 167053  | 269456  | 297939  | 227892  | 255193  | 342573  | 416008  | 329032  | 366897  | 322474  |
| EtherPE | PE O-11:0_28:0           | 774.63837 | [M-H] <sup>-</sup> | 6.914 | 28721       | 28147   | 18385   | 27890   | 27198   | 27818   | 20136   | 20205   | 19309   | 28192   | 19431   | 18454   | 18331   | 19563   | 18436   | 15211   |
| EtherPE | PE O-15:3_28:7           | 810.54614 | [M-H] <sup>-</sup> | 6.497 | 3965        | 65      | 699     | 32      | 491     | 37      | 1077    | 313     | 169     | 583     | 664     | 668     | 1149    | 370     | 333     | 751     |
| EtherPE | PE O-16:2_22:6           | 744.49487 | [M-H] <sup>-</sup> | 6.274 | 2527        | 2277    | 4274    | 3822    | 2397    | 5254    | 2040    | 2858    | 3386    | 2596    | 2936    | 4057    | 5650    | 4183    | 4646    | 5316    |
| EtherPE | PE O-16:3_24:6           | 770.51141 | [M-H] <sup>-</sup> | 6.498 | 1371        | 2020    | 2328    | 2704    | 1402    | 1768    | 1720    | 2210    | 2414    | 1774    | 2247    | 2327    | 3382    | 2946    | 1866    | 2305    |
| EtherPE | PE O-8:0_24:3            | 670.47681 | [M-H] <sup>-</sup> | 6.562 | 2001        | 1809    | 1454    | 1339    | 1759    | 2366    | 1322    | 1479    | 2186    | 1202    | 1689    | 2361    | 3135    | 1780    | 3132    | 2100    |
| EtherPE | PE O-8:0_26:0            | 704.56134 | [M-H] <sup>-</sup> | 7.896 | 2477        | 1743    | 1467    | 1252    | 1421    | 3168    | 1776    | 1400    | 2161    | 1220    | 1845    | 1684    | 990     | 1943    | 1494    | 2163    |
| EtherPE | PE O-8:0_28:1            | 730.57074 | [M-H] <sup>-</sup> | 7.857 | 700         | 131     | 137     | 67      | 158     | 374     | 1275    | 1343    | 213     | 747     | 108     | 95      | 447     | 296     | 82      | 341     |
| EtherPE | PE O-8:0_28:2            | 728.55847 | [M-H] <sup>-</sup> | 7.363 | 19473       | 13014   | 12554   | 13355   | 16570   | 15512   | 11565   | 10811   | 17107   | 10692   | 17673   | 19021   | 14743   | 12957   | 10901   | 7685    |
| EtherPE | PE O-9:0_26:4            | 710.51074 | [M-H] <sup>-</sup> | 6.897 | 2385        | 4649    | 4079    | 3309    | 4252    | 5683    | 4878    | 4183    | 5763    | 1945    | 3759    | 5488    | 7470    | 2981    | 7390    | 7196    |
| EtherPE | PE O-9:0_28:0            | 746.60535 | [M-H] <sup>-</sup> | 6.483 | 67877<br>0  | 629604  | 674151  | 1087439 | 1204181 | 729260  | 626707  | 1206622 | 1207365 | 608979  | 644632  | 735284  | 708809  | 834052  | 785595  | 702044  |
| EtherPE | PE O-9:0_28:3            | 740.55664 | [M-H] <sup>-</sup> | 7.754 | 7232        | 10499   | 4856    | 7478    | 6115    | 7255    | 7845    | 5736    | 5695    | 4442    | 10101   | 10981   | 13176   | 9518    | 12238   | 7967    |
| PE      | PE 34:1                  | 718.54266 | [M+H] <sup>+</sup> | 4.815 | 474         | 74997   | 2804    | 54074   | 11768   | 12060   | 1746    | 70430   | 20321   | 31110   | 32027   | 78909   | 93165   | 96931   | 52522   | 54131   |
| PE      | PE 34:1 PE 16:0_18:1     | 716.52405 | [M-H] <sup>-</sup> | 7.162 | 14642       | 14485   | 18986   | 10867   | 11694   | 19499   | 10566   | 13154   | 12188   | 7636    | 11628   | 17058   | 19483   | 18089   | 17179   | 17570   |
| PE      | PE 34:2 PE 16:0_18:2     | 716.52747 | [M+H] <sup>+</sup> | 4.333 | 16353<br>0  | 160309  | 369264  | 213018  | 288080  | 261349  | 148269  | 261980  | 326721  | 230883  | 210863  | 288597  | 477764  | 278301  | 329629  | 412056  |
| PE      | PE 34:3 PE 16:1_18:2     | 712.487   | [M-H] <sup>-</sup> | 6.333 | 2178        | 2050    | 5004    | 2005    | 1374    | 2589    | 2095    | 1104    | 2053    | 1075    | 1199    | 1880    | 2909    | 1301    | 2875    | 2221    |
| PE      | PE 35:2                  | 728.52136 | [M-H] <sup>-</sup> | 7.043 | 8239        | 6741    | 9231    | 7971    | 9534    | 12203   | 14677   | 7226    | 13514   | 9495    | 9164    | 14411   | 13378   | 8968    | 12545   | 20069   |
| PE      | PE 36:1 PE 18:0_18:1     | 744.55835 | [M-H] <sup>-</sup> | 7.611 | 36094       | 27133   | 30320   | 22394   | 28436   | 47816   | 26276   | 27979   | 30022   | 18151   | 31344   | 33234   | 34314   | 36207   | 32038   | 36073   |
| PE      | PE 36:2 PE 18:0_18:2     | 742.54077 | [M-H] <sup>-</sup> | 7.275 | 15565<br>56 | 1420766 | 1732373 | 1460068 | 1526606 | 1664750 | 1598864 | 1453750 | 2094274 | 1344356 | 1663062 | 2155382 | 2049075 | 1719660 | 1486018 | 1940362 |



|         |                      |            |                |       |            |        |        |        |        |        |        |        |        |        |        |        |        |        |        |        |
|---------|----------------------|------------|----------------|-------|------------|--------|--------|--------|--------|--------|--------|--------|--------|--------|--------|--------|--------|--------|--------|--------|
| PE      | PE 36:4 PE 16:0_20:4 | 738.50671  | [M-H]-         | 6.71  | 10947      | 8489   | 20063  | 8739   | 11662  | 12653  | 7693   | 11499  | 14774  | 15791  | 11088  | 14536  | 17795  | 13063  | 11729  | 12994  |
| PE      | PE 36:4 PE 18:2_18:2 | 740.52179  | [M+H]+         | 3.9   | 22581<br>5 | 176863 | 217668 | 145892 | 235276 | 299550 | 166607 | 186847 | 504011 | 209560 | 171887 | 418280 | 487113 | 223105 | 335374 | 433081 |
| PE      | PE 37:2 PE 19:0_18:2 | 756.55206  | [M-H]-         | 7.501 | 11813      | 11081  | 9788   | 10658  | 10089  | 13294  | 17702  | 11398  | 12708  | 9683   | 13113  | 17233  | 18239  | 13552  | 17409  | 23547  |
| PE      | PE 37:4              | 754.53247  | [M+H]+         | 4.336 | 20427      | 25068  | 19828  | 16472  | 3051   | 27652  | 17877  | 22625  | 20602  | 9736   | 22897  | 30631  | 33412  | 2951   | 38244  | 33667  |
| PE      | PE 37:4 PE 17:0_20:4 | 752.51904  | [M-H]-         | 6.951 | 3550       | 1022   | 3008   | 302    | 2094   | 4260   | 3264   | 2563   | 4549   | 3261   | 3006   | 2399   | 4039   | 3051   | 3281   | 4008   |
| PE      | PE 38:3 PE 18:0_20:3 | 768.5553   | [M-H]-         | 7.398 | 46980      | 29391  | 32632  | 32139  | 32114  | 61445  | 33256  | 35894  | 43324  | 29296  | 42751  | 46631  | 55632  | 46646  | 38496  | 43753  |
| PE      | PE 38:3 PE 20:1_18:2 | 768.54987  | [M-H]-         | 6.951 | 9333       | 9296   | 9477   | 7403   | 7950   | 9230   | 6512   | 9861   | 11358  | 5972   | 4310   | 11888  | 6745   | 9951   | 12163  | 4971   |
| PE      | PE 38:4 PE 16:0_22:4 | 766.53461  | [M-H]-         | 6.886 | 12522      | 9920   | 12049  | 8268   | 8687   | 15330  | 9432   | 8875   | 11867  | 8297   | 7851   | 13685  | 22475  | 11491  | 11547  | 19231  |
| PE      | PE 38:4 PE 18:0_20:4 | 766.54419  | [M-H]-         | 7.199 | 97628<br>8 | 395286 | 639673 | 360835 | 386569 | 761898 | 489532 | 385588 | 725496 | 660563 | 661300 | 700709 | 711898 | 681348 | 421850 | 475605 |
| PE      | PE 38:5              | 764.52618  | [M-H]-         | 6.759 | 11280      | 7290   | 15524  | 7123   | 5722   | 15391  | 7935   | 8065   | 13164  | 13240  | 9942   | 15541  | 16185  | 10332  | 13322  | 10852  |
| PE      | PE 38:5 PE 18:0_20:5 | 764.51965  | [M-H]-         | 6.894 | 8839       | 5705   | 9621   | 6520   | 6388   | 20946  | 6316   | 6752   | 10136  | 9047   | 10065  | 10270  | 15096  | 10864  | 15585  | 14124  |
| PE      | PE 38:6              | 764.53766  | [M+H]+         | 4.382 | 13997      | 9189   | 1099   | 5856   | 3758   | 8470   | 10189  | 10672  | 14503  | 12690  | 8656   | 17689  | 6365   | 2946   | 6754   | 12832  |
| PE      | PE 39:4 PE 19:0_20:4 | 780.55481  | [M-H]-         | 7.417 | 13691      | 8835   | 9056   | 8225   | 8161   | 12372  | 12136  | 8522   | 10088  | 10116  | 11224  | 11934  | 14016  | 11243  | 11629  | 11570  |
| PE      | PE 39:6              | 778.54523  | [M+H]+         | 4.477 | 10251      | 11703  | 994    | 16577  | 13552  | 7656   | 9824   | 16983  | 9657   | 5397   | 22190  | 19769  | 47199  | 10280  | 19565  | 28524  |
| PE      | PE 40:4              | 796.59357  | [M+H]+         | 5.297 | 15876      | 5622   | 37362  | 26875  | 9046   | 15511  | 12697  | 7750   | 8351   | 5675   | 0      | 87306  | 42716  | 11025  | 9777   | 57150  |
| PE      | PE 40:4 PE 20:2_20:2 | 794.56665  | [M-H]-         | 7.552 | 5475       | 7040   | 10179  | 8220   | 4471   | 4727   | 6579   | 13331  | 10894  | 8047   | 10702  | 14547  | 11498  | 3935   | 7628   | 3585   |
| PE      | PE 40:5 PE 18:0_22:5 | 792.55481  | [M-H]-         | 7.363 | 26363      | 16176  | 14965  | 13909  | 12878  | 17344  | 13440  | 21531  | 27682  | 15206  | 29733  | 28743  | 22541  | 28063  | 11790  | 12870  |
| PE      | PE 42:0_6:0          | 914.75934  | [M-H]-         | 9.597 | 3767       | 2816   | 1176   | 2816   | 1400   | 759    | 2172   | 1752   | 287    | 573    | 479    | 122    | 982    | 502    | 127    | 256    |
| PE      | PE 6:0_42:1          | 912.74371  | [M-H]-         | 9.433 | 2898       | 2330   | 1046   | 2835   | 928    | 617    | 1391   | 1295   | 232    | 415    | 500    | 229    | 1114   | 107    | 160    | 306    |
| PEtOH   | PEtOH 34:2           | 699.49841  | [M-H]-         | 6.38  | 70         | 14     | 17     | 9      | 30     | 7410   | 11     | 14     | 20     | 7      | 66     | 12     | 579    | 34     | 31     | 5686   |
| PEtOH   | PEtOH 43:10          | 809.50647  | [M-H]-         | 7.135 | 14140      | 18591  | 16584  | 16844  | 16716  | 15849  | 18782  | 16689  | 17436  | 13484  | 17568  | 17147  | 17751  | 16144  | 18544  | 18006  |
| PEtOH   | PEtOH 27:0_28:0      | 997.87097  | [M-H]-         | 6.986 | 5738       | 5892   | 3786   | 6610   | 5856   | 5845   | 5500   | 3551   | 6202   | 6199   | 5855   | 5393   | 5290   | 5577   | 2563   | 5806   |
| PEtOH   | PEtOH 28:0_28:0      | 1011.87286 | [M-H]-         | 8.251 | 13339      | 15182  | 13033  | 14067  | 14030  | 14326  | 14598  | 12745  | 14544  | 12225  | 13578  | 14312  | 13158  | 13058  | 13243  | 10855  |
| EtherPG | PG O-12:0_28:7       | 805.53656  | [M-H]-         | 7.266 | 1635       | 1835   | 3106   | 996    | 2555   | 3153   | 3994   | 4412   | 2523   | 2695   | 3608   | 5462   | 3827   | 2272   | 3737   | 4502   |
| EtherPG | PG O-13:0_28:6       | 821.56451  | [M-H]-         | 7.371 | 23450      | 18693  | 23254  | 11038  | 14977  | 16597  | 14835  | 17824  | 18257  | 13881  | 17131  | 15283  | 18835  | 25044  | 28527  | 23570  |
| EtherPG | PG O-13:0_28:7       | 819.54889  | [M+FA-H]<br>]- | 6.893 | 89001      | 129097 | 127662 | 114695 | 109006 | 110277 | 113103 | 122994 | 133520 | 119887 | 122313 | 124689 | 138215 | 117960 | 126728 | 129517 |
| EtherPG | PG O-14:0_28:2       | 843.65222  | [M-H]-         | 8.103 | 243        | 1732   | 589    | 628    | 235    | 952    | 1195   | 5772   | 1296   | 510    | 1528   | 1545   | 2383   | 1690   | 993    | 994    |
| EtherPG | PG O-15:0_28:3       | 855.64758  | [M-H]-         | 7.868 | 56         | 587    | 1462   | 86     | 1288   | 237    | 60     | 1395   | 627    | 1417   | 1574   | 2011   | 22493  | 10185  | 1702   | 8857   |
| EtherPG | PG O-15:0_28:6       | 849.5976   | [M-H]-         | 8.01  | 12761      | 8244   | 5387   | 3621   | 5595   | 8626   | 7128   | 7900   | 8041   | 2459   | 6119   | 7395   | 6385   | 8238   | 9334   | 4470   |

|         |                         |            |              |       |            |        |        |        |        |        |        |        |        |        |        |        |        |        |        |        |
|---------|-------------------------|------------|--------------|-------|------------|--------|--------|--------|--------|--------|--------|--------|--------|--------|--------|--------|--------|--------|--------|--------|
| EtherPG | PG O-15:0_28:7          | 847.58215  | [M-H]-       | 7.511 | 27627      | 19020  | 17250  | 19298  | 16510  | 28218  | 20988  | 22529  | 23150  | 43203  | 28321  | 54403  | 29110  | 35298  | 26719  | 21051  |
| EtherPG | PG O-16:1_28:7          | 859.58789  | [M-H]-       | 8.681 | 11670      | 12890  | 8790   | 8220   | 12488  | 12000  | 11924  | 8304   | 12694  | 13275  | 11118  | 12649  | 6176   | 12801  | 11961  | 10178  |
| EtherPG | PG O-16:4_26:7          | 825.50208  | [M-H]-       | 6.84  | 4071       | 2655   | 3610   | 2491   | 3492   | 4956   | 3336   | 3560   | 5168   | 3665   | 3305   | 5099   | 4564   | 2585   | 4850   | 4303   |
| EtherPG | PG O-25:0_28:0          | 1001.84369 | [M-H]-       | 8.256 | 3207       | 3295   | 2424   | 3080   | 2915   | 3314   | 3831   | 3149   | 3125   | 3110   | 3265   | 3196   | 2306   | 2888   | 2531   | 2275   |
| EtherPG | PG O-27:0_28:1          | 1027.86926 | [M-H]-       | 6.984 | 14181<br>4 | 136560 | 136953 | 131115 | 133792 | 137806 | 135233 | 136139 | 140639 | 127935 | 136722 | 138848 | 135174 | 130653 | 132435 | 129214 |
| EtherPG | PG O-9:0_28:0           | 777.60083  | [M-H]-       | 7.198 | 2587       | 10703  | 7586   | 8772   | 7389   | 7537   | 7703   | 16216  | 10151  | 6902   | 8607   | 10977  | 11906  | 12189  | 7203   | 8570   |
| PG      | PG 34:2                 | 764.55969  | [M+NH4]<br>+ | 6.652 | 908        | 458    | 42181  | 2651   | 667    | 380    | 723    | 7150   | 2981   | 5175   | 352    | 6302   | 444    | 435    | 919    | 388    |
| PG      | PG 36:3 PG<br>18:1_18:2 | 771.52051  | [M-H]-       | 5.662 | 2761       | 1744   | 562    | 1239   | 1892   | 1111   | 1511   | 1425   | 1434   | 815    | 1765   | 2400   | 1741   | 1716   | 771    | 1066   |
| PG      | PG 19:0_38:0            | 1071.89355 | [M-H]-       | 6.945 | 1457       | 1801   | 233    | 1186   | 1016   | 1272   | 1926   | 367    | 1480   | 1965   | 1722   | 1555   | 762    | 928    | 1204   | 1101   |
| PG      | PG 6:0_30:2             | 773.53424  | [M-H]-       | 6.498 | 14615      | 10669  | 5117   | 5486   | 11469  | 10811  | 6814   | 9727   | 10617  | 9752   | 11071  | 10783  | 13751  | 11352  | 11311  | 9261   |
| PG      | PG 6:0_32:4             | 797.53503  | [M-H]-       | 6.433 | 1288       | 1772   | 1817   | 1412   | 1593   | 945    | 868    | 2513   | 2125   | 1529   | 2151   | 1829   | 1713   | 1819   | 1034   | 1397   |
| EtherPI | PI O-8:0_17:0           | 697.43182  | [M-H]-       | 5.734 | 2085       | 2223   | 2010   | 1725   | 1794   | 1938   | 1680   | 1741   | 2027   | 1734   | 1663   | 2241   | 1584   | 1977   | 1948   | 1759   |
| EtherPI | PI O-8:0_24:1           | 793.53528  | [M-H]-       | 6.903 | 12141      | 10983  | 9019   | 7178   | 14771  | 13719  | 15621  | 7300   | 15727  | 13203  | 9478   | 7445   | 9928   | 13937  | 15419  | 11501  |
| EtherPI | PI O-8:0_28:3           | 845.55939  | [M-H]-       | 6.966 | 12612      | 11644  | 10887  | 6616   | 10665  | 12332  | 10446  | 11867  | 12286  | 9094   | 8410   | 14312  | 10915  | 9019   | 13541  | 11549  |
| EtherPI | PI O-9:0_26:7           | 823.48315  | [M-H]-       | 6.447 | 2243       | 2173   | 2458   | 1808   | 2369   | 2855   | 2172   | 2007   | 4060   | 2202   | 1865   | 3323   | 3349   | 2167   | 2700   | 3338   |
| EtherPI | PI O-9:0_28:7           | 851.51532  | [M-H]-       | 7.198 | 11567      | 7549   | 11682  | 7590   | 8549   | 12939  | 8839   | 7815   | 9372   | 13685  | 9960   | 8927   | 9403   | 9941   | 9684   | 10205  |
| PI      | PI 30:0                 | 800.5448   | [M+NH4]<br>+ | 5.168 | 19641      | 8255   | 16945  | 4644   | 8016   | 24145  | 9407   | 3042   | 6995   | 4438   | 5339   | 7728   | 2867   | 11239  | 21460  | 7308   |
| PI      | PI 34:0                 | 837.5517   | [M-H]-       | 6.648 | 13055      | 2887   | 4316   | 2865   | 5833   | 5836   | 8195   | 3448   | 3929   | 3701   | 4436   | 10641  | 5239   | 5267   | 3167   | 3469   |
| PI      | PI 34:1                 | 835.53107  | [M-H]-       | 6.216 | 2536       | 1783   | 2599   | 1081   | 2857   | 3191   | 3978   | 1380   | 985    | 1487   | 1455   | 5352   | 2831   | 2402   | 2550   | 2899   |
| PI      | PI 36:1                 | 863.56897  | [M-H]-       | 6.69  | 10036      | 3200   | 3708   | 2356   | 8768   | 5869   | 6671   | 4176   | 4395   | 3453   | 3351   | 9414   | 4564   | 5845   | 4945   | 5628   |
| PI      | PI 38:2 PI<br>18:0_20:2 | 889.58557  | [M-H]-       | 6.76  | 9978       | 1584   | 764    | 1219   | 4167   | 4104   | 3472   | 1705   | 1901   | 2153   | 1803   | 4407   | 3783   | 3922   | 2967   | 4054   |
| PI      | PI 38:3                 | 887.56769  | [M-H]-       | 6.482 | 18262      | 3846   | 5341   | 3971   | 8628   | 8832   | 7677   | 6272   | 3888   | 4216   | 5027   | 8778   | 9369   | 7380   | 5977   | 6809   |
| PI      | PI 38:4                 | 885.55304  | [M-H]-       | 6.294 | 13940<br>4 | 54183  | 51103  | 24044  | 70214  | 57081  | 72312  | 53499  | 33095  | 43980  | 58742  | 87509  | 73133  | 76303  | 46695  | 54561  |
| PI      | PI 40:4                 | 913.58405  | [M-H]-       | 6.622 | 4279       | 1148   | 804    | 1037   | 2400   | 2149   | 2282   | 1889   | 1231   | 1382   | 1123   | 2716   | 2008   | 2169   | 1572   | 1799   |
| PI      | PI 40:5                 | 911.56677  | [M-H]-       | 6.307 | 3032       | 866    | 1667   | 1344   | 2069   | 1976   | 1882   | 1960   | 1430   | 1664   | 1685   | 3440   | 3197   | 3116   | 2193   | 1948   |
| PI      | PI 18:0_38:2            | 1141.84448 | [M-H]-       | 7     | 5375       | 3870   | 2881   | 7178   | 3115   | 6195   | 6017   | 4766   | 2604   | 3959   | 4501   | 4401   | 4107   | 3409   | 5049   | 3183   |
| PI      | PI 6:0_34:3             | 915.59808  | [M-H]-       | 5.293 | 3444       | 3308   | 3318   | 3260   | 3173   | 3209   | 3001   | 3150   | 3643   | 2844   | 3429   | 3422   | 3282   | 3530   | 3652   | 3383   |
| EtherPS | PS O-8:0_16:2           | 604.35938  | [M-H]-       | 4.033 | 392        | 165    | 156    | 46     | 237    | 29     | 134    | 132    | 24     | 641    | 890    | 3446   | 276    | 976    | 588    | 976    |
| PS      | PS 36:0                 | 790.55945  | [M-H]-       | 7.096 | 4055       | 4728   | 2865   | 2602   | 2941   | 8134   | 5008   | 4656   | 4884   | 2948   | 5288   | 4587   | 6425   | 5254   | 8058   | 8900   |
| PS      | PS 36:0 PS<br>18:0_18:0 | 790.54297  | [M-H]-       | 7.143 | 6937       | 2190   | 6672   | 1702   | 3205   | 10125  | 4431   | 5711   | 9320   | 4267   | 6250   | 9032   | 9508   | 8450   | 10071  | 10677  |

|             |     |                      |           |        |       |             |         |         |         |         |         |         |         |         |         |         |         |         |         |         |         |
|-------------|-----|----------------------|-----------|--------|-------|-------------|---------|---------|---------|---------|---------|---------|---------|---------|---------|---------|---------|---------|---------|---------|---------|
|             | PS  | PS 36:1 PS 18:0_18:1 | 788.54248 | [M-H]- | 6.642 | 10057       | 20851   | 17465   | 16347   | 23258   | 25327   | 25967   | 25138   | 30044   | 22597   | 26397   | 32072   | 37774   | 26362   | 33166   | 39820   |
|             | PS  | PS 36:2 PS 18:0_18:2 | 786.53192 | [M-H]- | 6.569 | 65068       | 54330   | 37777   | 21632   | 65969   | 36670   | 62577   | 50969   | 36869   | 35170   | 51052   | 59206   | 72410   | 58340   | 48201   | 44916   |
|             | PS  | PS 36:2 PS 18:1_18:1 | 788.53845 | [M+H]+ | 4.025 | 15073<br>3  | 133675  | 158     | 58640   | 197296  | 114813  | 119326  | 148555  | 115328  | 102416  | 156991  | 174767  | 115053  | 187751  | 148170  | 144581  |
|             | PS  | PS 38:2              | 816.5827  | [M+H]+ | 4.832 | 38230       | 28872   | 13775   | 48901   | 86340   | 48793   | 15985   | 74011   | 35375   | 39360   | 71408   | 37181   | 26279   | 81018   | 36156   | 21555   |
|             | PS  | PS 38:4              | 812.53961 | [M+H]+ | 4.297 | 17744       | 1137    | 9935    | 1496    | 1450    | 1211    | 1686    | 7354    | 5235    | 1613    | 991     | 2115    | 2396    | 11771   | 4754    | 1327    |
|             | PS  | PS 40:4              | 840.56824 | [M+H]+ | 4.446 | 11098       | 17477   | 161     | 4177    | 33690   | 19612   | 13396   | 23710   | 11965   | 9585    | 28956   | 8772    | 24892   | 11383   | 19026   | 11732   |
|             | PS  | PS 40:5              | 836.54266 | [M-H]- | 6.508 | 1851        | 1732    | 1272    | 1842    | 2421    | 2578    | 2593    | 3696    | 3265    | 2353    | 2387    | 5615    | 5454    | 5210    | 4162    | 3267    |
|             | PS  | PS 40:6              | 834.53058 | [M-H]- | 7.197 | 15078       | 7727    | 10994   | 7588    | 7420    | 13873   | 8364    | 6966    | 10804   | 12832   | 9262    | 10256   | 10520   | 10317   | 8003    | 8697    |
|             | PS  | PS 16:4_24:6         | 826.4704  | [M-H]- | 7.546 | 3015        | 2789    | 1606    | 2050    | 1846    | 2145    | 2414    | 1872    | 2816    | 1281    | 2240    | 2861    | 3102    | 2430    | 2155    | 1887    |
|             | PS  | PS 18:5_22:6         | 824.45374 | [M-H]- | 7.131 | 1292        | 2347    | 1605    | 1198    | 1573    | 1409    | 2505    | 1680    | 2515    | 853     | 2142    | 2550    | 3148    | 1203    | 1861    | 2321    |
| Fatty acyls | CAR | CAR 20:0             | 456.39984 | [M+H]+ | 2.446 | 3061        | 28172   | 51065   | 34682   | 24898   | 1496    | 1206    | 13302   | 48355   | 7468    | 8818    | 69416   | 6539    | 41903   | 1008    | 3182    |
|             | CAR | CAR 22:1             | 482.41589 | [M+H]+ | 2.478 | 1788        | 41546   | 81086   | 47129   | 14168   | 609     | 1190    | 20796   | 58630   | 8199    | 3594    | 35222   | 3453    | 20989   | 407     | 2370    |
|             | FA  | FA 14:0              | 227.20117 | [M-H]- | 2.968 | 19450       | 19530   | 16237   | 16925   | 22399   | 15435   | 18878   | 15303   | 13209   | 8762    | 10362   | 10942   | 17073   | 12182   | 10445   | 10040   |
|             | FA  | FA 15:0              | 241.21648 | [M-H]- | 3.507 | 8234        | 4804    | 6522    | 7900    | 7525    | 7870    | 7304    | 7371    | 7592    | 5976    | 7153    | 6296    | 8321    | 6723    | 6836    | 6295    |
|             | FA  | FA 16:0              | 255.2338  | [M-H]- | 4.02  | 18060<br>81 | 1808094 | 1781058 | 1664426 | 1950866 | 1468360 | 1484602 | 1625549 | 1808072 | 1179240 | 1416577 | 1437405 | 1822299 | 1623326 | 1410361 | 1341359 |
|             | FA  | FA 16:1              | 253.21716 | [M-H]- | 3.176 | 96581       | 85542   | 70180   | 76052   | 124688  | 46126   | 85790   | 56435   | 33680   | 25701   | 16786   | 29867   | 70954   | 28218   | 13875   | 17461   |
|             | FA  | FA 17:0              | 269.24783 | [M-H]- | 4.535 | 11882       | 11567   | 10092   | 11531   | 9808    | 10840   | 10791   | 9109    | 11936   | 8278    | 9273    | 8539    | 10792   | 10601   | 9605    | 6531    |
|             | FA  | FA 17:1              | 267.23248 | [M-H]- | 3.685 | 6520        | 7638    | 5316    | 4502    | 6507    | 2139    | 2838    | 3738    | 3628    | 1037    | 3950    | 2195    | 4192    | 3420    | 1329    | 2419    |
|             | FA  | FA 18:0              | 283.26544 | [M-H]- | 5.026 | 14601<br>08 | 1359210 | 1487489 | 1415435 | 1284177 | 1270842 | 1135854 | 1470715 | 1848004 | 1067406 | 1424693 | 1299003 | 1801964 | 1635428 | 1331674 | 1241317 |
|             | FA  | FA 18:1              | 281.2496  | [M-H]- | 4.19  | 19602<br>06 | 2294494 | 1863782 | 1624873 | 2690209 | 1348997 | 1499866 | 1464267 | 1284084 | 861353  | 1156231 | 1124154 | 1899794 | 1183038 | 889344  | 743716  |
|             | FA  | FA 18:2              | 279.23407 | [M-H]- | 3.44  | 11956<br>32 | 1042489 | 936201  | 801064  | 835254  | 592916  | 570036  | 561502  | 759150  | 320677  | 514317  | 819792  | 1478918 | 575313  | 358606  | 343016  |
|             | FA  | FA 18:3              | 277.21698 | [M-H]- | 2.792 | 14155       | 22211   | 19658   | 25348   | 25205   | 25136   | 14672   | 15540   | 20401   | 9291    | 12635   | 16019   | 25651   | 17635   | 7481    | 13882   |
|             | FA  | FA 19:0              | 297.27792 | [M-H]- | 5.501 | 591         | 1195    | 1086    | 726     | 594     | 1465    | 757     | 1530    | 1330    | 445     | 527     | 819     | 2227    | 466     | 699     | 368     |
|             | FA  | FA 20:0              | 311.29449 | [M-H]- | 5.912 | 11462       | 10448   | 11255   | 10605   | 10085   | 11378   | 9930    | 11447   | 13610   | 8458    | 9703    | 10345   | 13664   | 11182   | 10430   | 10247   |
|             | FA  | FA 20:1              | 309.27994 | [M-H]- | 5.118 | 17249       | 13116   | 11321   | 11427   | 13755   | 12058   | 5892    | 10056   | 10361   | 7080    | 8791    | 11501   | 16381   | 8976    | 9482    | 7684    |
|             | FA  | FA 20:2              | 307.26309 | [M-H]- | 4.398 | 15901       | 11305   | 14050   | 14396   | 14514   | 16382   | 8643    | 4673    | 14361   | 6217    | 8530    | 13156   | 25689   | 9511    | 8475    | 6968    |
|             | FA  | FA 20:3              | 305.24786 | [M-H]- | 3.754 | 9448        | 7389    | 6397    | 15712   | 7218    | 8728    | 8271    | 12400   | 15513   | 3922    | 10558   | 7268    | 19161   | 8779    | 6254    | 5079    |
|             | FA  | FA 20:4              | 303.23343 | [M-H]- | 3.266 | 15075<br>5  | 70827   | 113808  | 103528  | 71099   | 94561   | 25334   | 127610  | 135234  | 52132   | 112985  | 123195  | 188865  | 94077   | 60364   | 49884   |
|             | FA  | FA 22:0              | 339.32559 | [M-H]- | 6.658 | 10223       | 6111    | 6981    | 6813    | 6605    | 9257    | 10408   | 8416    | 8277    | 5548    | 11075   | 6639    | 7304    | 6488    | 9232    | 9825    |
|             | FA  | FA 22:1              | 337.30893 | [M-H]- | 5.941 | 3659        | 3658    | 2201    | 2520    | 1371    | 4214    | 2218    | 2707    | 3183    | 2073    | 2382    | 2797    | 3958    | 2603    | 2692    | 2655    |

|       |                      |           |        |        |       |        |        |        |        |       |       |       |        |       |       |        |        |       |       |       |
|-------|----------------------|-----------|--------|--------|-------|--------|--------|--------|--------|-------|-------|-------|--------|-------|-------|--------|--------|-------|-------|-------|
| FA    | FA 22:4              | 331.26279 | [M-H]- | 4.065  | 15325 | 8535   | 13667  | 12147  | 12291  | 14646 | 10854 | 14466 | 19716  | 9451  | 11889 | 13749  | 20286  | 14192 | 11121 | 7953  |
| FA    | FA 22:5              | 329.2478  | [M-H]- | 3.439  | 6577  | 4705   | 10379  | 12837  | 6742   | 8847  | 4354  | 9467  | 14253  | 5789  | 8393  | 12611  | 24523  | 11729 | 8112  | 6130  |
| FA    | FA 24:0              | 367.35632 | [M-H]- | 7.288  | 22009 | 31791  | 29527  | 28298  | 24112  | 36938 | 17479 | 42638 | 26914  | 26826 | 23807 | 23634  | 32292  | 24146 | 30037 | 28675 |
| FA    | FA 24:1              | 365.33994 | [M-H]- | 6.656  | 2043  | 1959   | 1425   | 3084   | 1663   | 2104  | 1796  | 1894  | 1790   | 1270  | 1235  | 2215   | 2816   | 1890  | 1544  | 1191  |
| FA    | FA 25:0              | 381.37183 | [M-H]- | 7.507  | 16272 | 11416  | 25871  | 14215  | 16036  | 27413 | 13366 | 13460 | 28858  | 10979 | 26169 | 12625  | 17738  | 15245 | 24135 | 16195 |
| FA    | FA 26:0              | 395.38754 | [M-H]- | 7.799  | 45599 | 52136  | 55071  | 49044  | 48138  | 51505 | 44547 | 44648 | 51369  | 51249 | 49130 | 52040  | 53199  | 48683 | 53407 | 52925 |
| FA    | FA 27:0              | 409.40329 | [M-H]- | 8.014  | 9988  | 10905  | 8481   | 10478  | 11428  | 10022 | 8070  | 5412  | 11833  | 12024 | 11585 | 10715  | 11395  | 11755 | 11438 | 9964  |
| FA    | FA 28:0              | 423.42035 | [M-H]- | 8.244  | 19005 | 24341  | 22049  | 23784  | 21046  | 23406 | 17959 | 19108 | 23739  | 22075 | 22771 | 22365  | 24251  | 22915 | 21022 | 23550 |
| FA    | FA 29:0              | 437.4339  | [M-H]- | 8.447  | 4272  | 5104   | 5191   | 2811   | 5416   | 2811  | 3972  | 3847  | 5419   | 4194  | 3516  | 4580   | 4520   | 4029  | 5071  | 4641  |
| FA    | FA 30:0              | 451.45062 | [M-H]- | 8.629  | 9644  | 9448   | 8642   | 9864   | 9796   | 9685  | 9726  | 9748  | 9808   | 10822 | 10463 | 10138  | 9442   | 9233  | 11013 | 10817 |
| FA    | FA 32:0              | 479.48135 | [M-H]- | 8.955  | 2721  | 2727   | 2708   | 3137   | 2837   | 2618  | 3061  | 2666  | 3028   | 3279  | 3084  | 3325   | 2532   | 2941  | 3012  | 2569  |
| FA    | FA 32:1              | 477.4668  | [M-H]- | 8.581  | 3275  | 3063   | 2976   | 3471   | 2703   | 3312  | 3065  | 2975  | 2969   | 3220  | 3008  | 3018   | 2969   | 3411  | 3394  | 3142  |
| FA    | FA 40:5              | 581.52167 | [M-H]- | 7.369  | 4026  | 4330   | 5491   | 6497   | 5307   | 4334  | 5456  | 4773  | 5124   | 4666  | 4831  | 6347   | 4306   | 4795  | 5567  | 4280  |
| FA    | FA 42:5              | 609.5545  | [M-H]- | 7.798  | 5207  | 5608   | 5738   | 6939   | 6706   | 6164  | 6064  | 6888  | 6289   | 6063  | 7789  | 7984   | 5804   | 7235  | 6223  | 5638  |
| FA    | FA 44:5              | 637.59161 | [M-H]- | 8.17   | 3679  | 4512   | 3055   | 4200   | 4968   | 3679  | 3542  | 3885  | 4147   | 3299  | 4096  | 5609   | 3900   | 3205  | 3051  | 2007  |
| FA    | FA 12:0              | 199.16927 | [M-H]- | 10.045 | 236   | 206    | 124    | 178    | 208    | 205   | 205   | 115   | 103    | 219   | 132   | 103    | 3886   | 196   | 114   | 111   |
| FA    | FA 22:6              | 327.22977 | [M-H]- | 3.004  | 1406  | 1134   | 1202   | 2194   | 1173   | 1633  | 685   | 1860  | 2307   | 164   | 1651  | 2593   | 4023   | 2234  | 1614  | 1303  |
| FAHFA | AAHFA<br>18:5/15:4;O | 505.33136 | [M-H]- | 5.613  | 11777 | 8127   | 9326   | 8931   | 11391  | 7801  | 6689  | 12496 | 12058  | 7037  | 7363  | 9656   | 7288   | 10863 | 8694  | 11318 |
| FAHFA | AAHFA<br>22:0/8:0;O  | 481.42395 | [M-H]- | 7.467  | 10808 | 12324  | 18917  | 15399  | 12053  | 17626 | 17724 | 10517 | 17273  | 18566 | 8800  | 15996  | 15002  | 11892 | 17201 | 17222 |
| FAHFA | AAHFA<br>22:6/19:5;O | 613.43372 | [M-H]- | 7.202  | 2601  | 2179   | 1984   | 1860   | 2180   | 2100  | 1687  | 1349  | 2461   | 2097  | 1665  | 2394   | 2303   | 2063  | 2045  | 1971  |
| FAHFA | AAHFA<br>28:3/10:0;O | 587.50574 | [M-H]- | 4.024  | 7793  | 8355   | 6865   | 6953   | 8942   | 6132  | 6322  | 7122  | 8172   | 5182  | 5995  | 6670   | 7311   | 6858  | 5835  | 6167  |
| FAHFA | AAHFA<br>28:3/13:0;O | 629.54773 | [M-H]- | 7.719  | 1697  | 2493   | 3205   | 2839   | 2516   | 3465  | 1754  | 1927  | 2915   | 1775  | 3111  | 1901   | 2704   | 2176  | 2670  | 2204  |
| FAHFA | AAHFA<br>28:3/8:0;O  | 559.47302 | [M-H]- | 3.442  | 4761  | 3847   | 2645   | 2387   | 2207   | 1523  | 1381  | 1232  | 2011   | 605   | 988   | 2076   | 4940   | 1174  | 590   | 631   |
| FAHFA | AAHFA<br>28:4/13:0;O | 627.53143 | [M-H]- | 7.584  | 62771 | 105080 | 158796 | 104705 | 138455 | 86063 | 79919 | 67798 | 107577 | 83862 | 83183 | 121454 | 101417 | 71930 | 73117 | 61709 |
| FAHFA | AAHFA<br>28:4/15:0;O | 655.56366 | [M-H]- | 7.97   | 28285 | 7783   | 7270   | 6805   | 8283   | 16217 | 5563  | 6824  | 8759   | 8108  | 10696 | 11652  | 10562  | 7581  | 6659  | 5294  |
| FAHFA | AAHFA<br>28:4/16:0;O | 669.57904 | [M-H]- | 8.156  | 4089  | 2134   | 2109   | 2294   | 2527   | 2734  | 1494  | 2392  | 2298   | 2035  | 2408  | 2636   | 2705   | 2599  | 2138  | 1983  |
| FAHFA | AAHFA<br>28:4/18:0;O | 697.60986 | [M-H]- | 8.473  | 11256 | 9424   | 5393   | 6614   | 8827   | 10367 | 6640  | 9883  | 8104   | 7065  | 9033  | 11169  | 10224  | 10519 | 11251 | 6820  |
| FAHFA | AAHFA<br>28:4/19:0;O | 711.62488 | [M-H]- | 8.624  | 14077 | 10848  | 6777   | 9143   | 12123  | 15996 | 9238  | 11373 | 11024  | 9117  | 10019 | 12676  | 13180  | 13503 | 12640 | 8209  |
| FAHFA | AAHFA<br>28:5/19:0;O | 709.61053 | [M-H]- | 8.302  | 32101 | 27407  | 21789  | 22062  | 31479  | 31331 | 17876 | 27223 | 27445  | 19508 | 24119 | 35601  | 30327  | 28260 | 21721 | 16084 |
| FAHFA | AAHFA<br>28:6/10:0;O | 581.45013 | [M-H]- | 3.446  | 1924  | 1808   | 1365   | 1035   | 1155   | 687   | 631   | 682   | 1045   | 159   | 563   | 1033   | 3191   | 725   | 344   | 337   |

|               |          |                              |           |        |       |       |       |       |       |       |       |       |       |       |       |       |       |       |       |       |       |
|---------------|----------|------------------------------|-----------|--------|-------|-------|-------|-------|-------|-------|-------|-------|-------|-------|-------|-------|-------|-------|-------|-------|-------|
|               | FAHFA    | AAHFA<br>28:6/22:2;O         | 745.60907 | [M-H]- | 4.041 | 81513 | 84320 | 78342 | 80807 | 78488 | 72668 | 70261 | 71135 | 82859 | 70719 | 72459 | 73198 | 78042 | 79568 | 50288 | 50589 |
|               | FAHFA    | AAHFA<br>28:6/24:2;O         | 773.63629 | [M-H]- | 6.893 | 3456  | 1656  | 4036  | 3656  | 4435  | 3222  | 4108  | 3982  | 4794  | 4020  | 3714  | 3659  | 3031  | 4614  | 3570  | 2698  |
|               | FAHFA    | AAHFA<br>6:0/15:2;O          | 351.24985 | [M-H]- | 5.031 | 13143 | 12173 | 13761 | 12697 | 11829 | 11797 | 10968 | 13521 | 16577 | 10003 | 13290 | 12075 | 15787 | 13814 | 12182 | 11327 |
|               | NAE      | NAE 28:0                     | 468.46875 | [M+H]+ | 4.72  | 6957  | 8231  | 4868  | 7360  | 8139  | 6723  | 5623  | 5967  | 4516  | 7613  | 5060  | 9270  | 5317  | 6224  | 8462  | 7326  |
|               | NAGly    | NAGly 11:0                   | 242.17548 | [M-H]- | 3.983 | 1543  | 1686  | 599   | 3149  | 1286  | 772   | 1009  | 1627  | 1423  | 911   | 1259  | 1135  | 686   | 1529  | 1282  | 1640  |
|               | NAGly    | NAGly 15:4;O(FA<br>15:4)     | 522.3219  | [M-H]- | 5.611 | 17861 | 14796 | 17723 | 15684 | 17752 | 14573 | 12000 | 20666 | 18936 | 13574 | 13627 | 14912 | 14949 | 17202 | 17208 | 18284 |
|               | NAGly    | NAGly 28:2;O(FA<br>28:6)     | 886.73175 | [M-H]- | 9.412 | 5571  | 4421  | 386   | 5354  | 1088  | 1115  | 3587  | 1863  | 450   | 420   | 810   | 175   | 571   | 193   | 217   | 307   |
|               | NAGlySer | NAGlySer<br>10:0;O(FA 28:1)  | 735.58057 | [M-H]- | 6.822 | 40933 | 33801 | 29287 | 34442 | 31904 | 36106 | 37655 | 34259 | 37447 | 25503 | 32256 | 37281 | 31283 | 34703 | 30753 | 29994 |
|               | NAGlySer | NAGlySer<br>10:0;O(FA 28:6)  | 725.51154 | [M-H]- | 6.438 | 318   | 30    | 106   | 159   | 105   | 6745  | 180   | 95    | 132   | 119   | 129   | 169   | 584   | 184   | 175   | 3668  |
|               | NAGlySer | NAGlySer<br>14:0;O(FA 28:2)  | 789.63025 | [M-H]- | 6.905 | 2946  | 2582  | 3514  | 3595  | 3646  | 3470  | 3131  | 3577  | 4632  | 3606  | 4212  | 3805  | 2280  | 3869  | 3099  | 3582  |
|               | NAGlySer | NAGlySer<br>15:3;O(FA 28:6)  | 789.53668 | [M-H]- | 7.553 | 835   | 889   | 18    | 11    | 86    | 48    | 29    | 46    | 115   | 134   | 811   | 2305  | 1405  | 574   | 29    | 79    |
|               | NAGlySer | NAGlySer<br>16:1;O(FA 28:6)  | 807.58881 | [M-H]- | 7.918 | 11725 | 16058 | 9391  | 3226  | 4479  | 8925  | 6683  | 14101 | 10418 | 5543  | 3297  | 6742  | 6978  | 10242 | 13625 | 3590  |
|               | NAGlySer | NAGlySer<br>20:0;O(FA 28:1)  | 875.73511 | [M-H]- | 9.544 | 2642  | 2586  | 1381  | 3112  | 2569  | 1369  | 2231  | 2046  | 414   | 698   | 634   | 349   | 1152  | 844   | 945   | 848   |
|               | NAGlySer | NAGlySer<br>8:0;O(FA 24:1)   | 651.48828 | [M-H]- | 5.031 | 2753  | 2442  | 2665  | 2519  | 2561  | 2527  | 1944  | 2978  | 3832  | 2015  | 2762  | 2402  | 3421  | 3199  | 2439  | 2561  |
|               | NAGlySer | NAGlySer<br>8:0;O(FA 25:0)   | 667.51715 | [M-H]- | 7.137 | 14278 | 16409 | 15093 | 19940 | 17778 | 18479 | 23110 | 19415 | 17951 | 20423 | 21177 | 14992 | 18635 | 18737 | 19478 | 18581 |
|               | OxFA     | FA 16:1;O                    | 269.21121 | [M-H]- | 4.021 | 3739  | 3242  | 2962  | 3411  | 3258  | 2679  | 3283  | 2794  | 2721  | 1260  | 2814  | 2258  | 2230  | 2693  | 2758  | 2435  |
|               | OxFA     | FA 18:1;O                    | 297.24213 | [M-H]- | 4.193 | 5891  | 5706  | 4708  | 4263  | 6598  | 3768  | 4633  | 4067  | 3009  | 2421  | 2973  | 2866  | 4666  | 3137  | 2305  | 2220  |
|               | OxFA     | FA 18:2;(2OH)                | 295.22668 | [M-H]- | 3.443 | 4174  | 2674  | 2403  | 2414  | 2146  | 1605  | 1812  | 1954  | 2494  | 811   | 1535  | 2310  | 2982  | 1911  | 1026  | 502   |
|               | OxFA     | FA 20:0;O4                   | 375.27371 | [M-H]- | 3.545 | 18033 | 18493 | 17002 | 17419 | 17950 | 17985 | 15175 | 20230 | 20519 | 14449 | 18685 | 17809 | 17225 | 20030 | 17621 | 18915 |
|               | OxFA     | FA 22:0;O4                   | 403.30579 | [M-H]- | 4.518 | 52658 | 49702 | 48961 | 48756 | 50086 | 48256 | 40634 | 51964 | 58104 | 40362 | 49150 | 46548 | 43351 | 52103 | 51994 | 50748 |
| Sphingolipids | Cer      | Cer<br>12:0;O3/21:0(2OH<br>) | 602.5119  | [M-H]- | 7.583 | 7143  | 10591 | 15280 | 11296 | 13879 | 8645  | 8256  | 7402  | 10917 | 8574  | 7928  | 11085 | 8882  | 7972  | 7572  | 6039  |
|               | Cer      | Cer<br>12:0;O3/23:0(2OH<br>) | 584.52356 | [M-H]- | 7.297 | 2799  | 2887  | 3308  | 4033  | 3255  | 3270  | 2135  | 2260  | 1997  | 2089  | 1968  | 2103  | 3261  | 2102  | 2047  | 2780  |
|               | Cer      | Cer<br>12:0;O3/30:0(2OH<br>) | 682.63019 | [M-H]- | 8.577 | 2779  | 2707  | 2398  | 2780  | 2675  | 3374  | 1991  | 2815  | 3004  | 2560  | 3145  | 3246  | 2984  | 3143  | 3263  | 2708  |
|               | Cer      | Cer<br>12:0;O3/31:0(2OH<br>) | 696.64508 | [M-H]- | 8.722 | 3219  | 3416  | 3017  | 3474  | 3158  | 3986  | 3369  | 3238  | 3425  | 3376  | 2582  | 3773  | 3595  | 3863  | 3971  | 3581  |
|               | Cer      | Cer<br>12:0;O3/33:0(2OH<br>) | 724.68286 | [M-H]- | 8.96  | 2127  | 2324  | 1101  | 2694  | 2861  | 2565  | 2460  | 2397  | 2910  | 2188  | 2819  | 2467  | 2678  | 2352  | 2920  | 2566  |

|     |                           |            |                |       |       |        |       |       |        |        |        |        |        |        |        |        |        |        |        |       |
|-----|---------------------------|------------|----------------|-------|-------|--------|-------|-------|--------|--------|--------|--------|--------|--------|--------|--------|--------|--------|--------|-------|
| Cer | Cer<br>12:1;O3/22:0(2OH ) | 568.49274  | [M-H]-         | 6.881 | 1812  | 1793   | 2046  | 2120  | 1892   | 1774   | 1460   | 1697   | 1196   | 1500   | 1180   | 1762   | 2642   | 1326   | 813    | 1065  |
| Cer | Cer<br>12:1;O3/24:0(2OH ) | 596.52496  | [M-H]-         | 7.371 | 5364  | 7640   | 10323 | 8309  | 8890   | 5874   | 6344   | 5366   | 8863   | 6729   | 6466   | 9750   | 8693   | 6565   | 4720   | 5172  |
| Cer | Cer<br>12:1;O3/25:0(2OH ) | 656.55914  | [M-H]-         | 8.536 | 2368  | 1158   | 504   | 1235  | 508    | 1006   | 1766   | 1453   | 227    | 486    | 573    | 367    | 556    | 651    | 523    | 537   |
| Cer | Cer<br>12:1;O3/26:0(2OH ) | 624.55756  | [M-H]-         | 7.782 | 10061 | 4971   | 4962  | 4562  | 5372   | 7585   | 4777   | 4384   | 5049   | 4795   | 6917   | 6561   | 5589   | 4627   | 4367   | 3759  |
| Cer | Cer<br>12:1;O3/28:0(2OH ) | 652.58722  | [M-H]-         | 8.154 | 4111  | 2253   | 1626  | 2031  | 1928   | 2900   | 2005   | 1908   | 2108   | 1765   | 2135   | 2478   | 2400   | 2248   | 1906   | 1638  |
| Cer | Cer<br>12:1;O3/30:0(2OH ) | 726.63629  | [M-H]-         | 6.51  | 75956 | 106417 | 76976 | 91511 | 103880 | 113808 | 104179 | 168009 | 122762 | 162551 | 134749 | 128085 | 111859 | 173572 | 163840 | 94109 |
| Cer | Cer<br>12:1;O3/31:1(2OH ) | 692.61975  | [M+FA-H]<br>]- | 8.301 | 51625 | 42904  | 33271 | 36328 | 46997  | 49753  | 27391  | 42601  | 40574  | 29841  | 34578  | 53918  | 44367  | 41326  | 33556  | 24269 |
| Cer | Cer<br>12:1;O3/32:0(2OH ) | 754.65912  | [M-H]-         | 8.248 | 4117  | 3536   | 4266  | 3637  | 3831   | 3596   | 3341   | 3407   | 3944   | 3901   | 3833   | 3643   | 4079   | 3690   | 3502   | 3062  |
| Cer | Cer<br>12:1;O3/32:3(2OH ) | 748.60748  | [M-H]-         | 7.143 | 2277  | 3771   | 2708  | 4361  | 3915   | 3119   | 5156   | 2209   | 1335   | 4174   | 4004   | 4422   | 5291   | 3810   | 2523   | 4036  |
| Cer | Cer<br>12:1;O3/32:5(2OH ) | 744.57239  | [M-H]-         | 7.547 | 547   | 1130   | 663   | 342   | 566    | 2560   | 1424   | 620    | 2874   | 1898   | 958    | 1755   | 1421   | 1426   | 2194   | 2655  |
| Cer | Cer<br>13:1;O3/26:3(2OH ) | 678.52594  | [M-H]-         | 7.577 | 2412  | 2941   | 3786  | 3284  | 3676   | 2721   | 2437   | 2296   | 3050   | 2211   | 2429   | 3242   | 2767   | 2456   | 2238   | 1960  |
| Cer | Cer<br>16:1;O3/38:6(2OH ) | 836.7135   | [M-H]-         | 9.531 | 4180  | 1834   | 688   | 3074  | 1545   | 1574   | 4032   | 1971   | 345    | 555    | 162    | 180    | 361    | 697    | 730    | 412   |
| Cer | Cer<br>16:2;O3/38:6(2OH ) | 834.69611  | [M-H]-         | 9.366 | 4377  | 1998   | 862   | 3284  | 1286   | 1110   | 3892   | 2023   | 191    | 195    | 840    | 61     | 934    | 501    | 711    | 510   |
| Cer | Cer<br>18:1;O3/38:6(2OH ) | 864.74402  | [M-H]-         | 9.711 | 6945  | 3187   | 1430  | 5435  | 2606   | 2749   | 6663   | 3216   | 544    | 1116   | 1531   | 769    | 1661   | 1165   | 1264   | 1249  |
| Cer | Cer<br>18:2;O3/38:6(2OH ) | 862.72937  | [M-H]-         | 9.547 | 11780 | 5041   | 1780  | 8412  | 3723   | 3445   | 10164  | 5048   | 609    | 1229   | 292    | 864    | 1916   | 1183   | 1604   | 1353  |
| Cer | Cer<br>20:1;O3/38:6(2OH ) | 892.77466  | [M-H]-         | 9.878 | 3256  | 2334   | 614   | 3275  | 1782   | 1772   | 3137   | 1611   | 134    | 759    | 572    | 104    | 734    | 542    | 650    | 747   |
| Cer | Cer<br>20:2;O3/38:6(2OH ) | 890.75952  | [M-H]-         | 9.718 | 16362 | 10211  | 3864  | 12489 | 5691   | 6011   | 13371  | 7204   | 1107   | 2127   | 3480   | 1096   | 3366   | 2053   | 2219   | 2925  |
| Cer | Cer<br>26:1;O3/38:5(2OH ) | 1024.89062 | [M-H]-         | 6.994 | 27539 | 32858  | 34072 | 27905 | 33668  | 31217  | 28580  | 32255  | 33900  | 31689  | 31116  | 27457  | 29331  | 30106  | 29682  | 29674 |

|     |                                |           |                        |       |            |        |        |        |        |        |        |        |        |        |        |        |        |        |        |        |
|-----|--------------------------------|-----------|------------------------|-------|------------|--------|--------|--------|--------|--------|--------|--------|--------|--------|--------|--------|--------|--------|--------|--------|
| Cer | Cer 37:2;O3 Cer 16:1;O2/21:1;O | 576.55109 | [M+H-H2O] <sup>+</sup> | 6.028 | 51665      | 37029  | 490    | 13205  | 43606  | 54067  | 7213   | 46751  | 48495  | 48209  | 42511  | 50255  | 47998  | 51087  | 8928   | 3027   |
| Cer | Cer 42:1;O3 Cer 18:1;O2/24:0;O | 648.62622 | [M+H-H2O] <sup>+</sup> | 6.543 | 83637      | 80451  | 58483  | 61450  | 101802 | 97566  | 44859  | 98956  | 88094  | 60581  | 70320  | 119261 | 92537  | 84378  | 70249  | 47972  |
| Cer | Cer 47:3;O3 Cer 29:3;O2/18:0;O | 714.66815 | [M+H-H2O] <sup>+</sup> | 8.756 | 11652      | 8210   | 3029   | 11568  | 9060   | 12004  | 11140  | 11903  | 20629  | 20347  | 16422  | 21541  | 8388   | 13855  | 18028  | 16534  |
| Cer | Cer 36:0;O2 Cer 18:0;O2/18:0   | 612.55553 | [M+HCOO] <sup>-</sup>  | 7.728 | 2338       | 3132   | 3428   | 3555   | 3534   | 4084   | 2087   | 2506   | 3605   | 2503   | 4144   | 3089   | 3180   | 2891   | 3362   | 2370   |
| Cer | Cer 36:1;O2 Cer 17:0;O2/19:1   | 588.53076 | [M+Na] <sup>+</sup>    | 5.438 | 13086<br>6 | 224382 | 505670 | 238201 | 373449 | 231168 | 175254 | 217436 | 284903 | 238582 | 259169 | 329613 | 276381 | 222738 | 234646 | 191259 |
| Cer | Cer 42:1;O2 Cer 17:0;O2/25:1   | 672.6203  | [M+Na] <sup>+</sup>    | 7.045 | 20292      | 14454  | 2331   | 15222  | 18308  | 25264  | 12463  | 21133  | 19056  | 21096  | 15603  | 24660  | 21685  | 21538  | 22711  | 16619  |
| Cer | Cer 48:0;O2 Cer 22:0;O2/26:0   | 736.74365 | [M+H] <sup>+</sup>     | 8.292 | 11295      | 12141  | 314    | 7127   | 4239   | 9367   | 8673   | 13708  | 14468  | 12920  | 10545  | 14692  | 14715  | 14876  | 16322  | 9321   |
| Cer | Cer 56:5;O2 Cer 18:0;O2/38:5   | 860.79736 | [M+Na] <sup>+</sup>    | 9.147 | 40358      | 82605  | 138626 | 76810  | 80265  | 18311  | 38637  | 52911  | 20642  | 32051  | 31509  | 13476  | 27291  | 31651  | 5011   | 27130  |
| Cer | Cer 56:6;O2 Cer 18:0;O2/38:6   | 858.78229 | [M+Na] <sup>+</sup>    | 8.938 | 47601      | 83637  | 62604  | 83382  | 77527  | 21327  | 48234  | 56911  | 28177  | 36273  | 31569  | 17975  | 36642  | 32731  | 10874  | 29637  |
| Cer | Cer 13:0;O2/26:5               | 598.51691 | [M-H] <sup>-</sup>     | 7.374 | 2850       | 2807   | 2829   | 3595   | 2888   | 2911   | 2826   | 2780   | 2906   | 3628   | 2629   | 3140   | 2076   | 2876   | 2622   | 2921   |
| Cer | Cer 13:0;O2/28:5               | 626.54645 | [M-H] <sup>-</sup>     | 7.797 | 4443       | 4846   | 5056   | 6157   | 5837   | 5815   | 4904   | 5180   | 5406   | 5485   | 5407   | 6433   | 5394   | 5250   | 5344   | 4689   |
| Cer | Cer 13:0;O2/30:5               | 654.58179 | [M-H] <sup>-</sup>     | 8.161 | 3092       | 2410   | 2944   | 3009   | 2859   | 2300   | 1698   | 3317   | 2832   | 2764   | 3661   | 3212   | 2452   | 2958   | 2372   | 2152   |
| Cer | Cer 13:0;O2/34:5               | 710.64209 | [M-H] <sup>-</sup>     | 7.943 | 7640       | 7831   | 7738   | 6903   | 8815   | 7523   | 8429   | 7345   | 8302   | 8134   | 7672   | 8468   | 8779   | 6605   | 8139   | 8785   |
| Cer | Cer 34:1;O2 Cer 16:1;O2/18:0   | 520.50452 | [M+H-H2O] <sup>+</sup> | 4.808 | 58623      | 65790  | 68598  | 71324  | 61712  | 58676  | 29769  | 33253  | 41376  | 36233  | 36320  | 44444  | 73902  | 38531  | 37816  | 31627  |
| Cer | Cer 34:1;O2 Cer 18:1;O2/16:0   | 538.51288 | [M+H] <sup>+</sup>     | 4.831 | 21620      | 26489  | 30809  | 33367  | 25011  | 26153  | 10893  | 22744  | 17466  | 18097  | 14475  | 14395  | 36350  | 18365  | 14780  | 10706  |
| Cer | Cer 35:1;O2 Cer 17:1;O2/18:0   | 534.51947 | [M+H-H2O] <sup>+</sup> | 5.14  | 15894      | 24748  | 36412  | 27242  | 30764  | 12957  | 19744  | 22083  | 30788  | 25833  | 21992  | 31239  | 28329  | 20694  | 16242  | 20259  |
| Cer | Cer 36:1;O2 Cer 18:1;O2/18:0   | 548.53894 | [M+H-H2O] <sup>+</sup> | 5.436 | 34346<br>6 | 588896 | 650436 | 533066 | 868223 | 505358 | 360401 | 421220 | 698565 | 460201 | 490351 | 758664 | 551062 | 441216 | 395320 | 292182 |
| Cer | Cer 37:1;O2 Cer 17:1;O2/20:0   | 562.55188 | [M+H-H2O] <sup>+</sup> | 5.738 | 25964      | 14831  | 12360  | 12527  | 18232  | 22547  | 11971  | 14009  | 15721  | 13387  | 18561  | 22053  | 19309  | 14109  | 13689  | 10832  |
| Cer | Cer 38:1;O2 Cer 18:1;O2/20:0   | 594.57764 | [M+H] <sup>+</sup>     | 6.002 | 44900      | 12028  | 201    | 13606  | 11026  | 33379  | 10838  | 14203  | 14883  | 12043  | 19537  | 19065  | 18113  | 12901  | 12367  | 7644   |
| Cer | Cer 40:1;O2 Cer 17:1;O2/23:0   | 644.58936 | [M+Na] <sup>+</sup>    | 6.563 | 28235      | 19823  | 22539  | 16146  | 23998  | 25472  | 14331  | 26795  | 19503  | 17433  | 23314  | 26425  | 29406  | 26990  | 25239  | 20463  |
| Cer | Cer 40:1;O2 Cer 18:1;O2/22:0   | 604.59918 | [M+H-H2O] <sup>+</sup> | 6.551 | 60454      | 42444  | 480    | 32964  | 46521  | 51386  | 29985  | 45215  | 38157  | 29178  | 40248  | 47138  | 51127  | 43581  | 40970  | 27605  |
| Cer | Cer 40:1;O2 Cer 24:1;O2/16:0   | 666.60437 | [M+HCOO] <sup>-</sup>  | 8.316 | 20793      | 13478  | 8458   | 11627  | 12863  | 15951  | 11476  | 12482  | 11528  | 8976   | 12108  | 13859  | 14943  | 12419  | 11441  | 8806   |
| Cer | Cer 40:2;O2 Cer 26:1;O2/14:1   | 642.58185 | [M+Na] <sup>+</sup>    | 5.89  | 6965       | 36533  | 3908   | 10172  | 45297  | 26038  | 30789  | 22364  | 22520  | 24831  | 25157  | 18825  | 10001  | 9170   | 15486  | 3846   |
| Cer | Cer 41:1;O2 Cer 17:1;O2/24:0   | 618.61456 | [M+H-H2O] <sup>+</sup> | 6.803 | 53812      | 50711  | 5298   | 28883  | 45463  | 59949  | 30626  | 61978  | 39509  | 34512  | 45760  | 62249  | 57193  | 55768  | 61836  | 31897  |
| Cer | Cer 41:1;O2 Cer 18:1;O2/23:0   | 680.62012 | [M+HCOO] <sup>-</sup>  | 8.476 | 18465      | 14602  | 7473   | 10142  | 13060  | 16307  | 10075  | 14183  | 11733  | 9318   | 12814  | 16535  | 14875  | 15392  | 16583  | 9569   |
| Cer | Cer 41:2;O2 Cer 17:1;O2/24:1   | 616.59747 | [M+H-H2O] <sup>+</sup> | 6.298 | 8621       | 8554   | 7749   | 7543   | 8166   | 9040   | 5031   | 9604   | 8435   | 7122   | 7630   | 11443  | 10482  | 9508   | 6544   | 6324   |
| Cer | Cer 42:1;O2 Cer 18:1;O2/24:0   | 632.62915 | [M+H-H2O] <sup>+</sup> | 7.043 | 14444<br>4 | 110758 | 83536  | 87693  | 136292 | 166774 | 86144  | 137067 | 133313 | 103364 | 121417 | 150831 | 164063 | 151541 | 143745 | 94783  |
| Cer | Cer 42:2;O2 Cer 18:1;O2/24:1   | 630.61554 | [M+H-H2O] <sup>+</sup> | 6.543 | 17605<br>9 | 152060 | 108499 | 117314 | 197066 | 208588 | 81573  | 178863 | 160646 | 113989 | 137549 | 230216 | 192275 | 161045 | 137597 | 86843  |

|         |                                      |            |            |       |       |       |       |       |       |       |       |       |       |       |       |       |       |       |       |       |
|---------|--------------------------------------|------------|------------|-------|-------|-------|-------|-------|-------|-------|-------|-------|-------|-------|-------|-------|-------|-------|-------|-------|
| Cer     | Cer 42:2;O2 Cer 26:2;O2/16:0         | 646.61102  | [M-H]-     | 8.303 | 2001  | 1706  | 1374  | 1666  | 1984  | 1971  | 1307  | 1905  | 1658  | 1401  | 1546  | 2083  | 1885  | 1720  | 1405  | 1159  |
| Cer     | Cer 42:3;O2 Cer 18:1;O2/24:2         | 646.60645  | [M+H]+     | 6.107 | 17054 | 19510 | 26806 | 18387 | 22431 | 21930 | 11672 | 21106 | 17533 | 17984 | 16001 | 23600 | 29596 | 21158 | 17570 | 17860 |
| Cer     | Cer 44:4;O2 Cer 20:1;O2/24:3         | 694.6048   | [M+Na]+    | 8.548 | 7159  | 5252  | 25707 | 4088  | 5644  | 30740 | 5114  | 7514  | 18961 | 23779 | 10511 | 48059 | 18122 | 24274 | 15223 | 17820 |
| Cer     | Cer 44:4;O2 Cer 28:2;O2/16:2         | 694.60815  | [M+Na]+    | 8.228 | 20226 | 21595 | 1718  | 19379 | 18684 | 22511 | 13424 | 25695 | 31356 | 14644 | 24709 | 26484 | 28448 | 32003 | 42995 | 32447 |
| Cer     | Cer 44:6;O2 Cer 20:1;O2/24:5         | 690.57605  | [M+Na]+    | 7.797 | 37099 | 41511 | 38613 | 33391 | 38772 | 35829 | 26562 | 34837 | 49278 | 42990 | 46196 | 49336 | 42725 | 46935 | 45591 | 41754 |
| Cer     | Cer 45:2;O2 Cer 18:1;O2/27:1         | 712.67065  | [M+Na]+    | 6.826 | 887   | 5150  | 1182  | 2019  | 5241  | 1762  | 819   | 5399  | 3317  | 3896  | 8699  | 3285  | 6835  | 5896  | 6124  | 4999  |
| Cer     | Cer 45:2;O2 Cer 20:1;O2/25:1         | 712.67377  | [M+Na]+    | 7.025 | 4080  | 1935  | 1182  | 1052  | 2160  | 1762  | 756   | 4464  | 4491  | 2176  | 2555  | 2260  | 2092  | 2556  | 1563  | 1664  |
| Cer     | Cer 47:4;O2 Cer 29:3;O2/18:1         | 736.67102  | [M+Na]+    | 7.037 | 791   | 859   | 307   | 0     | 506   | 1251  | 686   | 2362  | 700   | 468   | 909   | 1003  | 2445  | 786   | 654   | 927   |
| Cer     | Cer 48:1;O2 Cer 22:1;O2/26:0         | 716.72101  | [M+H-H2O]+ | 8.222 | 2379  | 3893  | 5162  | 5520  | 5550  | 8046  | 6473  | 6956  | 5905  | 5223  | 3686  | 3210  | 9916  | 2463  | 3783  | 5538  |
| Cer     | Cer 51:1;O2 Cer 15:1;O2/36:0         | 798.75873  | [M+Na]+    | 8.732 | 2752  | 3839  | 2390  | 3246  | 4580  | 1352  | 2259  | 2732  | 1643  | 2393  | 1785  | 5239  | 1588  | 3570  | 1842  | 751   |
| Cer     | Cer 52:6;O2 Cer 18:2;O2/34:4         | 802.69147  | [M+Na]+    | 8.585 | 3393  | 1466  | 25355 | 5354  | 3860  | 8597  | 4689  | 7531  | 12462 | 5261  | 12151 | 13188 | 12778 | 11856 | 9932  | 7965  |
| Cer     | Cer 15:3;O2/32:6                     | 702.57843  | [M-H]-     | 7.598 | 12086 | 13021 | 17323 | 17897 | 16562 | 14666 | 12645 | 14433 | 17268 | 16835 | 17244 | 17068 | 17009 | 13836 | 12689 | 17080 |
| Cer     | Cer 15:3;O2/34:6                     | 730.61066  | [M-H]-     | 7.949 | 72456 | 81919 | 83206 | 73541 | 78654 | 76712 | 78319 | 76940 | 80102 | 85175 | 89268 | 84041 | 86364 | 86633 | 81102 | 87378 |
| Cer     | Cer 15:3;O2/36:6                     | 758.6402   | [M-H]-     | 8.258 | 3153  | 4087  | 3544  | 3006  | 4135  | 3702  | 3560  | 3413  | 3783  | 3401  | 3991  | 3922  | 3315  | 3928  | 3683  | 3844  |
| Hex2Cer | Hex2Cer 36:1;O2 Hex2Cer 17:0;O2/19:1 | 890.64319  | [M+H]+     | 4.469 | 7562  | 665   | 19280 | 1773  | 2623  | 2733  | 1847  | 7967  | 1625  | 7107  | 1182  | 4026  | 1551  | 2661  | 2512  | 3048  |
| Hex2Cer | Hex2Cer 31:6;O2                      | 854.48938  | [M-H]-     | 7.135 | 4604  | 4829  | 4150  | 4562  | 4880  | 4246  | 5990  | 4435  | 5064  | 3530  | 4298  | 4630  | 5491  | 3717  | 5228  | 5476  |
| HexCer  | HexCer 16:1;O3/25:0(2OH)             | 874.66486  | [M-H]-     | 8.358 | 1672  | 3817  | 1780  | 3731  | 3307  | 6690  | 1858  | 11228 | 6649  | 1788  | 6281  | 8478  | 5144  | 7430  | 4340  | 2624  |
| HexCer  | HexCer 16:1;O3/27:0(2OH)             | 856.68738  | [M-H]-     | 8.21  | 444   | 1177  | 165   | 1711  | 811   | 299   | 530   | 3220  | 334   | 757   | 1831  | 224   | 47    | 1568  | 730   | 1124  |
| HexCer  | HexCer 17:0;O3/38:0(2OH)             | 1072.89441 | [M-H]-     | 7.268 | 3302  | 3610  | 193   | 3518  | 1108  | 1900  | 2289  | 547   | 2628  | 1626  | 265   | 301   | 309   | 968   | 198   | 370   |
| HexCer  | HexCer 16:0;O2/17:1;O                | 746.54144  | [M-H]-     | 6.651 | 108   | 46    | 19    | 107   | 16    | 25    | 36    | 36    | 230   | 44    | 81    | 291   | 26    | 24    | 82    | 40    |
| HexCer  | HexCer 17:0;O2/20:5;O                | 794.54303  | [M-H]-     | 7.494 | 14807 | 823   | 11993 | 10692 | 4858  | 13383 | 313   | 10186 | 16052 | 14288 | 8214  | 16604 | 8606  | 9883  | 7705  | 7948  |
| HexCer  | HexCer 17:0;O2/22:6;O                | 820.56281  | [M-H]-     | 7.524 | 6913  | 9018  | 7505  | 3308  | 6014  | 9473  | 4213  | 10008 | 7072  | 3804  | 5285  | 5732  | 6063  | 5914  | 5785  | 5876  |
| HexCer  | HexCer 42:1;O3 HexCer 18:1;O2/24:0;O | 872.67944  | [M+HCOO]-  | 8.113 | 252   | 2146  | 192   | 1743  | 1063  | 64    | 532   | 3646  | 700   | 972   | 1464  | 470   | 147   | 1487  | 914   | 2003  |
| HexCer  | HexCer 16:1;O2/26:6;O                | 860.58752  | [M-H]-     | 6.769 | 8472  | 6367  | 13673 | 6913  | 6468  | 7153  | 4583  | 8477  | 5816  | 8113  | 6577  | 6311  | 12960 | 7789  | 6344  | 6084  |
| HexCer  | HexCer 16:2;O2/15:1;O                | 668.48132  | [M-H]-     | 5.032 | 1599  | 1749  | 2172  | 1798  | 1846  | 1638  | 1407  | 1898  | 2495  | 1439  | 1886  | 1714  | 1962  | 1966  | 1832  | 1639  |



|        |                            |           |                |       |            |         |         |         |         |         |         |         |         |         |         |         |         |         |         |         |
|--------|----------------------------|-----------|----------------|-------|------------|---------|---------|---------|---------|---------|---------|---------|---------|---------|---------|---------|---------|---------|---------|---------|
| HexCer | HexCer 16:3;O2/22:6;O      | 800.49768 | [M-H]-         | 7.292 | 2011       | 1513    | 2643    | 2568    | 2166    | 2508    | 2670    | 2186    | 2474    | 2369    | 1966    | 2630    | 2029    | 1210    | 2541    | 2852    |
| HexCer | HexCer 17:1;O2/20:5;O      | 792.52576 | [M+FA-H]<br>]- | 6.901 | 20763      | 27966   | 24543   | 24545   | 22979   | 21415   | 24245   | 22986   | 27761   | 23899   | 22447   | 24098   | 27411   | 22053   | 24215   | 25717   |
| HexCer | HexCer 17:2;O2/22:6;O      | 816.5329  | [M+FA-H]<br>]- | 6.577 | 2807       | 2427    | 452     | 2009    | 1943    | 2734    | 2596    | 2002    | 3601    | 2037    | 993     | 2784    | 3141    | 2446    | 3081    | 2825    |
| SHex   | SG 27:0;O;Hex              | 595.42493 | [M-H]-         | 4.024 | 4678       | 4930    | 5060    | 4462    | 5353    | 3836    | 4383    | 3916    | 4736    | 3304    | 3676    | 3780    | 4954    | 4707    | 3426    | 3285    |
| SHex   | SG 29:1;O;Hex              | 621.43597 | [M-H]-         | 5.688 | 2277       | 2216    | 2882    | 1868    | 2127    | 2038    | 1945    | 3170    | 3782    | 1924    | 1825    | 2561    | 2688    | 2752    | 2340    | 2433    |
| SL     | SL 13:1;O/28:3;O           | 708.52563 | [M-H]-         | 6.799 | 2137       | 2050    | 1820    | 2385    | 2160    | 2086    | 1822    | 2180    | 2092    | 1866    | 2053    | 1746    | 1652    | 2062    | 1989    | 1866    |
| SM     | SM 33:1;O2                 | 689.55359 | [M+H]+         | 3.828 | 15732      | 28754   | 37306   | 24039   | 13344   | 37461   | 22535   | 66958   | 33751   | 26001   | 33041   | 48590   | 76560   | 60405   | 26727   | 42942   |
| SM     | SM 34:0;O2                 | 705.5863  | [M+H]+         | 4.373 | 39276      | 50128   | 51457   | 37506   | 39986   | 97862   | 15391   | 86909   | 47064   | 44008   | 64061   | 73561   | 101074  | 97067   | 58831   | 62944   |
| SM     | SM 34:1;O2 SM 16:1;O2/18:0 | 703.57574 | [M+H]+         | 4.121 | 32057<br>5 | 700984  | 735691  | 474671  | 419514  | 912930  | 428677  | 1893589 | 661580  | 439242  | 711426  | 1049578 | 1999753 | 1379253 | 511130  | 834045  |
| SM     | SM 35:1;O2                 | 717.58844 | [M+H]+         | 4.49  | 65203      | 144937  | 81220   | 89253   | 78215   | 67899   | 94347   | 201778  | 154430  | 109828  | 155584  | 157332  | 179749  | 170956  | 49854   | 101186  |
| SM     | SM 35:3;O2                 | 729.55688 | [M+H]+         | 4.449 | 59654      | 66672   | 1110    | 25280   | 54732   | 23370   | 54616   | 57364   | 30674   | 41890   | 141505  | 71592   | 96922   | 71328   | 31304   | 28862   |
| SM     | SM 35:7;O2                 | 721.50043 | [M+H]+         | 5.371 | 99990      | 123959  | 1932    | 132281  | 127554  | 130085  | 102369  | 136057  | 142053  | 125753  | 125767  | 135374  | 151136  | 134282  | 150288  | 154652  |
| SM     | SM 36:1;O2                 | 775.59692 | [M+HCO<br>O]-  | 7.2   | 28365      | 119574  | 97934   | 78559   | 73893   | 65980   | 74174   | 191518  | 102555  | 74083   | 94393   | 138280  | 138665  | 126928  | 71029   | 86940   |
| SM     | SM 36:1;O2 SM 18:1;O2/18:0 | 731.60461 | [M+H]+         | 4.82  | 71805<br>8 | 2909924 | 2861430 | 1813784 | 2080798 | 1987579 | 1632545 | 5607990 | 2914554 | 2023826 | 2862771 | 3877266 | 4462127 | 4058854 | 2142005 | 2509781 |
| SM     | SM 37:4;O2                 | 755.56641 | [M+H]+         | 4.461 | 17497      | 29433   | 823     | 49634   | 17264   | 22462   | 13720   | 39544   | 11737   | 25701   | 37563   | 31731   | 88451   | 25996   | 28498   | 87392   |
| SM     | SM 37:5;O2 SM 19:0;O2/18:5 | 737.57068 | [M+H]+         | 4.977 | 7620       | 18640   | 734     | 13766   | 26825   | 26909   | 13549   | 62537   | 51960   | 29937   | 13205   | 15404   | 21633   | 23508   | 7958    | 29707   |
| SM     | SM 37:8;O2                 | 747.51025 | [M+H]+         | 4.562 | 42396      | 34832   | 340     | 43459   | 31485   | 39341   | 28930   | 36488   | 33175   | 37253   | 10919   | 32797   | 26132   | 11621   | 30698   | 33982   |
| SM     | SM 37:9;O2                 | 745.50372 | [M+H]+         | 5.377 | 926        | 1109    | 3602    | 7594    | 5860    | 7849    | 3318    | 10033   | 8229    | 6787    | 7525    | 5631    | 3383    | 5054    | 11135   | 12394   |
| SM     | SM 38:0;O2                 | 761.64996 | [M+H]+         | 6.923 | 6709       | 48456   | 1533    | 46300   | 6870    | 2107    | 7582    | 33689   | 3440    | 0       | 6733    | 3923    | 12823   | 2709    | 2809    | 2371    |
| SM     | SM 38:1;O2                 | 759.62988 | [M+H]+         | 5.571 | 20889<br>3 | 122273  | 152821  | 116528  | 7955    | 390712  | 142870  | 477820  | 218746  | 180390  | 295937  | 303131  | 361956  | 408040  | 93129   | 226334  |
| SM     | SM 38:7;O2                 | 747.53076 | [M+H]+         | 5.278 | 885        | 3134    | 1177    | 1262    | 1547    | 1802    | 4056    | 3452    | 707     | 15119   | 2821    | 30736   | 2433    | 1958    | 15297   | 592     |
| SM     | SM 38:9;O2                 | 759.51697 | [M+H]+         | 5.4   | 28604      | 12226   | 1436    | 12400   | 1245    | 10650   | 1317    | 876     | 3767    | 4557    | 1168    | 0       | 0       | 847     | 584     | 810     |
| SM     | SM 39:8;O2                 | 759.53497 | [M+H]+         | 6.246 | 1020       | 0       | 39677   | 0       | 1245    | 0       | 0       | 0       | 0       | 887     | 0       | 0       | 3102    | 1658    | 0       | 0       |
| SM     | SM 39:9;O2                 | 773.53156 | [M+H]+         | 5.392 | 39717      | 46334   | 48575   | 54278   | 48734   | 45394   | 31886   | 47789   | 47624   | 39721   | 48494   | 50469   | 45367   | 46192   | 42421   | 47909   |
| SM     | SM 40:1;O2                 | 787.66156 | [M+H]+         | 6.334 | 6204       | 68712   | 19421   | 34567   | 41416   | 87441   | 51864   | 301608  | 104542  | 52765   | 85412   | 154910  | 177859  | 171631  | 82434   | 104047  |
| SM     | SM 40:9;O2                 | 787.52734 | [M+H]+         | 4.813 | 3906       | 2658    | 1171    | 739     | 2291    | 1176    | 594     | 630     | 1474    | 1478    | 1469    | 1477    | 5112    | 3837    | 886     | 348     |
| SM     | SM 41:1;O2                 | 801.6803  | [M+H]+         | 6.68  | 49432      | 75869   | 2886    | 48290   | 53311   | 92077   | 54940   | 198701  | 71762   | 54711   | 92021   | 119163  | 126305  | 157153  | 98193   | 82916   |
| SM     | SM 41:2;O2 SM 22:0;O2/19:2 | 799.6626  | [M+H]+         | 5.929 | 3124       | 50114   | 30739   | 31252   | 957     | 48330   | 30591   | 115331  | 54262   | 38308   | 68782   | 81376   | 85882   | 91321   | 46388   | 53143   |
| SM     | SM 41:7;O2                 | 789.60449 | [M+H]+         | 5.169 | 61649<br>4 | 290374  | 2656    | 365064  | 433416  | 608894  | 360637  | 574525  | 549669  | 359852  | 660827  | 533590  | 678853  | 701882  | 509269  | 438322  |

|               |    |                            |           |                      |       |             |         |        |         |         |         |         |         |         |         |         |         |         |         |         |         |
|---------------|----|----------------------------|-----------|----------------------|-------|-------------|---------|--------|---------|---------|---------|---------|---------|---------|---------|---------|---------|---------|---------|---------|---------|
|               | SM | SM 41:8;O2                 | 787.58899 | [M+H] <sup>+</sup>   | 4.546 | 16373<br>2  | 104984  | 181395 | 30576   | 80643   | 122699  | 116746  | 33850   | 192154  | 86618   | 128179  | 198428  | 51141   | 258062  | 229346  | 184380  |
|               | SM | SM 41:9;O2                 | 785.57434 | [M+H] <sup>+</sup>   | 4.709 | 43721       | 158618  | 30111  | 95838   | 63659   | 53801   | 136515  | 46325   | 51026   | 119645  | 73230   | 125535  | 83026   | 149068  | 59622   | 271627  |
|               | SM | SM 42:1;O2                 | 815.68787 | [M+H] <sup>+</sup>   | 6.412 | 11119       | 22318   | 10598  | 5796    | 29644   | 52255   | 3439    | 53860   | 36935   | 23808   | 14050   | 42441   | 20528   | 42847   | 42994   | 22933   |
|               | SM | SM 42:2;O2 SM 18:1;O2/24:1 | 813.68488 | [M+H] <sup>+</sup>   | 6.263 | 37999<br>4  | 714410  | 375187 | 447225  | 541830  | 1030654 | 359452  | 2091674 | 807509  | 582072  | 846057  | 1173871 | 1362062 | 1552510 | 663550  | 723296  |
|               | SM | SM 42:3;O2                 | 833.64038 | [M+Na] <sup>+</sup>  | 5.651 | 3504        | 5698    | 679    | 4995    | 7130    | 18267   | 7363    | 17771   | 15624   | 3773    | 18568   | 24181   | 36291   | 27307   | 10383   | 8128    |
|               | SM | SM 42:3;O2 SM 20:0;O2/22:3 | 811.66229 | [M+H] <sup>+</sup>   | 5.668 | 71772       | 165825  | 182183 | 125220  | 112463  | 252216  | 104171  | 402352  | 185340  | 138072  | 171502  | 283738  | 495940  | 334037  | 165364  | 191703  |
|               | SM | SM 43:5;O2                 | 821.65485 | [M+H] <sup>+</sup>   | 4.926 | 4158        | 226     | 89     | 221     | 159     | 2648    | 1918    | 2347    | 1179    | 1180    | 3162    | 1713    | 1257    | 1475    | 2656    | 2952    |
|               | SM | SM 12:1;O2/29:0            | 845.67267 | [M-H] <sup>-</sup>   | 8.739 | 2375        | 2012    | 953    | 2027    | 1231    | 2239    | 639     | 7957    | 2052    | 1651    | 1318    | 2053    | 3248    | 3112    | 988     | 1776    |
|               | SM | SM 12:1;O2/30:1            | 857.67242 | [M-H] <sup>-</sup>   | 8.356 | 19704       | 25825   | 18114  | 10393   | 21996   | 36718   | 20746   | 61293   | 32618   | 22235   | 14090   | 42917   | 44013   | 52920   | 26170   | 26459   |
|               | SM | SM 12:1;O2/35:0            | 929.77985 | [M-H] <sup>-</sup>   | 9.725 | 3192        | 4003    | 1962   | 3426    | 3052    | 1503    | 1977    | 2213    | 451     | 831     | 1122    | 398     | 1491    | 659     | 716     | 1041    |
|               | SM | SM 37:6;O3                 | 795.52936 | [M-H] <sup>-</sup>   | 6.877 | 1754        | 2460    | 5308   | 5147    | 4854    | 2446    | 2111    | 5091    | 7005    | 2237    | 4855    | 3544    | 2442    | 3468    | 5195    | 2392    |
|               | SM | SM 39:4;O3                 | 827.59741 | [M-H] <sup>-</sup>   | 7.95  | 4430        | 5263    | 4646   | 5664    | 4837    | 5373    | 5305    | 4624    | 5097    | 6161    | 4703    | 5324    | 3431    | 5699    | 5241    | 5340    |
|               | SM | SM 42:2;O3                 | 873.67603 | [M-H] <sup>-</sup>   | 8.207 | 412         | 1064    | 435    | 1597    | 779     | 548     | 144     | 3065    | 602     | 670     | 1746    | 527     | 508     | 1450    | 773     | 1301    |
|               | SM | SM 42:3;O3                 | 871.65778 | [M-H] <sup>-</sup>   | 7.857 | 158         | 1946    | 279    | 2097    | 878     | 262     | 347     | 4304    | 734     | 732     | 2202    | 427     | 188     | 1802    | 534     | 1407    |
|               | SM | SM 43:0;O3                 | 891.72247 | [M-H] <sup>-</sup>   | 9.562 | 3764        | 3402    | 2897   | 2009    | 3344    | 2260    | 3252    | 2936    | 971     | 1478    | 1372    | 731     | 2706    | 1620    | 1181    | 1816    |
|               | SM | SM 45:0;O3                 | 919.76038 | [M-H] <sup>-</sup>   | 8.814 | 1609        | 2483    | 266    | 4304    | 552     | 1335    | 1218    | 735     | 40      | 86      | 338     | 6       | 1004    | 51      | 444     | 105     |
|               | SM | SM 45:1;O3                 | 917.73749 | [M-H] <sup>-</sup>   | 9.593 | 2677        | 3059    | 2252   | 2750    | 2260    | 1020    | 1787    | 2029    | 592     | 1098    | 1239    | 178     | 1891    | 916     | 523     | 1121    |
| Glycerolipids | DG | DG 23:3                    | 459.30017 | [M+Na] <sup>+</sup>  | 2.802 | 60176       | 71881   | 58222  | 63514   | 74319   | 70230   | 53648   | 74619   | 60081   | 49676   | 79230   | 59540   | 73296   | 69991   | 61493   | 61684   |
|               | DG | DG 30:0                    | 563.46191 | [M+Na] <sup>+</sup>  | 5.293 | 32407       | 55548   | 101938 | 70046   | 75261   | 47725   | 54264   | 54954   | 34267   | 35394   | 33071   | 27863   | 55491   | 33514   | 42289   | 42389   |
|               | DG | DG 30:1                    | 561.44495 | [M+Na] <sup>+</sup>  | 4.731 | 18636       | 26125   | 20421  | 32580   | 39829   | 11704   | 35790   | 18335   | 4143    | 7382    | 6318    | 4727    | 19735   | 9378    | 8853    | 5679    |
|               | DG | DG 30:1 DG 12:0_18:1       | 556.4873  | [M+NH4] <sup>+</sup> | 4.726 | 42775       | 56886   | 1007   | 53211   | 79971   | 24777   | 60622   | 31615   | 19870   | 11628   | 15743   | 8058    | 61078   | 13259   | 19237   | 15980   |
|               | DG | DG 31:4                    | 569.42462 | [M+Na] <sup>+</sup>  | 6.062 | 11479       | 7864    | 18915  | 12011   | 11719   | 13316   | 7510    | 16268   | 12275   | 12094   | 13923   | 16982   | 16785   | 15306   | 17864   | 19182   |
|               | DG | DG 32:0                    | 591.49451 | [M+Na] <sup>+</sup>  | 5.842 | 13300<br>90 | 1546002 | 10298  | 1467876 | 1695583 | 1549517 | 1229941 | 1752722 | 1620718 | 1605120 | 1678614 | 1780213 | 1711303 | 1840579 | 1980299 | 1951635 |
|               | DG | DG 32:0 DG 16:0_16:0       | 586.53949 | [M+NH4] <sup>+</sup> | 5.872 | 61620<br>1  | 726384  | 768703 | 676244  | 960832  | 710149  | 521468  | 779941  | 761406  | 566512  | 718687  | 774733  | 840264  | 766490  | 682739  | 583888  |
|               | DG | DG 32:1                    | 589.47748 | [M+Na] <sup>+</sup>  | 5.35  | 11431<br>3  | 158084  | 5349   | 216124  | 306306  | 97032   | 228104  | 158802  | 49359   | 66911   | 66416   | 44423   | 153267  | 59555   | 74977   | 63778   |
|               | DG | DG 32:1 DG 16:0_16:1       | 584.52319 | [M+NH4] <sup>+</sup> | 5.356 | 23733<br>1  | 338048  | 253029 | 327766  | 610691  | 192394  | 402561  | 231387  | 104801  | 89558   | 132815  | 90264   | 303628  | 108085  | 103243  | 85269   |
|               | DG | DG 32:2                    | 587.45557 | [M+Na] <sup>+</sup>  | 4.822 | 10672       | 26230   | 591    | 26967   | 19285   | 16230   | 30799   | 6305    | 3239    | 14606   | 3796    | 1847    | 20135   | 1883    | 9564    | 1650    |
|               | DG | DG 32:2 DG 16:1_16:1       | 582.50568 | [M+NH4] <sup>+</sup> | 4.832 | 87369       | 120229  | 886    | 110426  | 162492  | 52547   | 111912  | 78719   | 50065   | 33751   | 46762   | 33550   | 131138  | 50395   | 50996   | 37149   |
|               | DG | DG 33:0                    | 605.50336 | [M+Na] <sup>+</sup>  | 6.195 | 4820        | 19135   | 1093   | 20848   | 16568   | 3375    | 22765   | 23057   | 24410   | 30611   | 28034   | 26535   | 28144   | 25744   | 21912   | 30294   |
|               | DG | DG 33:1                    | 603.49298 | [M+Na] <sup>+</sup>  | 5.665 | 2960        | 16312   | 28804  | 13061   | 22939   | 12490   | 8331    | 17368   | 11335   | 9900    | 14129   | 11239   | 21585   | 15637   | 13849   | 9818    |

|    |                      |           |                      |       |             |         |         |         |         |         |         |         |         |         |         |         |         |         |         |         |
|----|----------------------|-----------|----------------------|-------|-------------|---------|---------|---------|---------|---------|---------|---------|---------|---------|---------|---------|---------|---------|---------|---------|
| DG | DG 33:1 DG 15:0_18:1 | 598.53558 | [M+NH4] <sup>+</sup> | 5.615 | 18566       | 20907   | 19615   | 17613   | 25396   | 17622   | 18168   | 17007   | 16752   | 10789   | 19507   | 16669   | 27456   | 16486   | 13038   | 4025    |
| DG | DG 33:2 DG 15:0_18:2 | 596.52222 | [M+NH4] <sup>+</sup> | 5.174 | 5563        | 15515   | 16138   | 7490    | 6707    | 11646   | 10682   | 8070    | 12358   | 5884    | 8304    | 3768    | 19380   | 7205    | 1365    | 12447   |
| DG | DG 34:0              | 619.52576 | [M+Na] <sup>+</sup>  | 6.378 | 22411<br>46 | 2457674 | 45973   | 2277902 | 2573238 | 2464598 | 1996808 | 2584184 | 2554996 | 2486756 | 2823838 | 2905832 | 2754527 | 2815927 | 2853040 | 2971394 |
| DG | DG 34:0 DG 16:0_18:0 | 614.56952 | [M+NH4] <sup>+</sup> | 6.401 | 13677<br>23 | 1634897 | 65513   | 1345206 | 1571854 | 1553044 | 1046513 | 1613669 | 2018102 | 1434616 | 1692374 | 1775699 | 1544972 | 1856914 | 1603630 | 1367110 |
| DG | DG 34:1              | 617.51044 | [M+Na] <sup>+</sup>  | 5.889 | 74718<br>4  | 1107020 | 60692   | 1005324 | 1810542 | 906262  | 1079392 | 798000  | 693429  | 594613  | 759412  | 830550  | 1417305 | 795572  | 642220  | 486616  |
| DG | DG 34:1 DG 16:0_18:1 | 612.55634 | [M+NH4] <sup>+</sup> | 5.911 | 10270<br>63 | 1866158 | 73971   | 1451174 | 3366266 | 1151091 | 1513650 | 1219825 | 959076  | 641278  | 1065751 | 985908  | 2011542 | 1033156 | 600528  | 407446  |
| DG | DG 34:2              | 615.49255 | [M+Na] <sup>+</sup>  | 5.449 | 39181<br>2  | 841949  | 11758   | 677240  | 1016963 | 425715  | 668988  | 586014  | 406244  | 371131  | 486028  | 448584  | 1036327 | 522860  | 389511  | 406768  |
| DG | DG 34:2 DG 16:0_18:2 | 610.53888 | [M+NH4] <sup>+</sup> | 5.474 | 66925<br>0  | 1419583 | 1158558 | 927762  | 1756152 | 625646  | 1000695 | 735819  | 607372  | 425768  | 670008  | 589943  | 1630644 | 692544  | 374009  | 364062  |
| DG | DG 34:3              | 613.4743  | [M+Na] <sup>+</sup>  | 5.022 | 10014       | 14856   | 81279   | 21240   | 19819   | 3177    | 13249   | 6539    | 8004    | 7718    | 7320    | 2315    | 14403   | 11011   | 10860   | 3134    |
| DG | DG 34:3 DG 16:1_18:2 | 608.5202  | [M+NH4] <sup>+</sup> | 4.936 | 92837       | 114310  | 886     | 86333   | 82655   | 27137   | 81229   | 40458   | 48685   | 31409   | 30588   | 30871   | 108550  | 29115   | 15444   | 15333   |
| DG | DG 34:4 DG 16:2_18:2 | 606.50299 | [M+NH4] <sup>+</sup> | 4.647 | 8907        | 15344   | 16373   | 16453   | 18911   | 2423    | 16074   | 4227    | 5983    | 4285    | 248     | 10763   | 12934   | 5141    | 4269    | 1454    |
| DG | DG 35:0              | 633.53381 | [M+Na] <sup>+</sup>  | 7.072 | 1877        | 628     | 14806   | 315     | 4393    | 421     | 853     | 2476    | 735     | 2922    | 433     | 16252   | 895     | 723     | 913     | 1204    |
| DG | DG 35:2 DG 17:1_18:1 | 624.54846 | [M+NH4] <sup>+</sup> | 5.477 | 1514        | 4352    | 651     | 2265    | 29276   | 3819    | 1516    | 2308    | 4269    | 2573    | 4701    | 2713    | 3532    | 4725    | 1685    | 877     |
| DG | DG 35:3              | 627.48523 | [M+Na] <sup>+</sup>  | 5.238 | 1908        | 7545    | 278     | 1612    | 4901    | 591     | 6842    | 662     | 367     | 475     | 523     | 571     | 2939    | 271     | 1372    | 259     |
| DG | DG 36:0              | 647.55432 | [M+Na] <sup>+</sup>  | 6.355 | 1629        | 1644    | 4303    | 552     | 1467    | 1161    | 599     | 24402   | 15646   | 2641    | 18257   | 1841    | 20305   | 2223    | 621     | 6313    |
| DG | DG 36:0 DG 18:0_18:0 | 642.60059 | [M+NH4] <sup>+</sup> | 6.892 | 68943<br>9  | 793830  | 381112  | 647913  | 789593  | 733401  | 531683  | 795862  | 935716  | 673289  | 824779  | 923107  | 731939  | 915326  | 737014  | 747640  |
| DG | DG 36:1              | 645.54022 | [M+Na] <sup>+</sup>  | 6.466 | 65271       | 118367  | 173519  | 108619  | 179818  | 85616   | 79494   | 136675  | 153656  | 92364   | 159728  | 123645  | 174838  | 125660  | 87602   | 78062   |
| DG | DG 36:1 DG 18:0_18:1 | 640.58411 | [M+NH4] <sup>+</sup> | 6.442 | 10200<br>3  | 177218  | 282632  | 156386  | 238735  | 136905  | 124484  | 184995  | 243917  | 125446  | 209664  | 179930  | 229623  | 190422  | 115535  | 98139   |
| DG | DG 36:2              | 643.52661 | [M+Na] <sup>+</sup>  | 6.021 | 38749<br>3  | 918667  | 1068816 | 409901  | 1258860 | 412154  | 768781  | 640160  | 521997  | 230837  | 701174  | 303600  | 817571  | 571648  | 241883  | 340254  |
| DG | DG 36:2 DG 18:1_18:1 | 638.57025 | [M+NH4] <sup>+</sup> | 6.012 | 52543<br>8  | 1372265 | 875125  | 487761  | 1912743 | 508193  | 1105177 | 519688  | 454603  | 270364  | 625688  | 297134  | 855172  | 452009  | 216432  | 192237  |
| DG | DG 36:3              | 641.51129 | [M+Na] <sup>+</sup>  | 5.543 | 21099<br>4  | 482870  | 841567  | 289968  | 550074  | 143846  | 285956  | 228241  | 194557  | 178917  | 239561  | 231090  | 652509  | 231097  | 124921  | 147141  |
| DG | DG 36:3 DG 18:1_18:2 | 636.55505 | [M+NH4] <sup>+</sup> | 5.523 | 32921<br>3  | 771258  | 7170    | 351226  | 794569  | 178259  | 401881  | 250424  | 255403  | 195566  | 276632  | 265109  | 850709  | 275058  | 116533  | 129359  |
| DG | DG 36:4              | 639.49188 | [M+Na] <sup>+</sup>  | 5.077 | 27873       | 58063   | 155263  | 60188   | 51750   | 21468   | 46194   | 25726   | 27869   | 30834   | 26109   | 22507   | 67123   | 26756   | 20764   | 27639   |
| DG | DG 36:4 DG 16:0_20:4 | 634.53595 | [M+NH4] <sup>+</sup> | 5.361 | 17932       | 28079   | 224176  | 19753   | 22147   | 23666   | 16361   | 27609   | 23341   | 15559   | 23596   | 24722   | 33172   | 23122   | 18294   | 2814    |
| DG | DG 36:4 DG 18:2_18:2 | 634.53534 | [M+NH4] <sup>+</sup> | 5.047 | 13039<br>2  | 240678  | 4549    | 157485  | 179795  | 83894   | 134298  | 97423   | 106601  | 80311   | 119680  | 115024  | 306969  | 123890  | 67197   | 81527   |
| DG | DG 36:5              | 637.47668 | [M+Na] <sup>+</sup>  | 4.642 | 8415        | 2288    | 14257   | 17954   | 11598   | 8746    | 12416   | 4728    | 1708    | 4619    | 2209    | 1626    | 14794   | 8657    | 1495    | 9060    |
| DG | DG 37:0 DG 16:0_21:0 | 656.61053 | [M+NH4] <sup>+</sup> | 8.173 | 56438       | 49645   | 40979   | 18228   | 38504   | 54131   | 48325   | 56221   | 55589   | 64358   | 32993   | 40333   | 46915   | 32074   | 80680   | 38397   |

|    |                      |           |                      |       |          |          |          |          |          |          |          |          |          |          |          |          |          |          |          |          |
|----|----------------------|-----------|----------------------|-------|----------|----------|----------|----------|----------|----------|----------|----------|----------|----------|----------|----------|----------|----------|----------|----------|
| DG | DG 37:1 DG 16:0_21:1 | 654.59338 | [M+NH4] <sup>+</sup> | 6     | 8253     | 9223     | 14101    | 9512     | 15552    | 535      | 8209     | 7802     | 3543     | 3687     | 6997     | 7678     | 14122    | 3474     | 2522     | 2392     |
| DG | DG 37:7              | 647.45679 | [M+Na] <sup>+</sup>  | 6.861 | 12809772 | 14729562 | 14126655 | 11329502 | 15398570 | 14172616 | 10718988 | 14166106 | 15781613 | 13303203 | 14593541 | 17602526 | 14712951 | 16005603 | 14284448 | 14436369 |
| DG | DG 38:0              | 675.58148 | [M+Na] <sup>+</sup>  | 7.398 | 8301     | 7306     | 11696    | 568      | 8388     | 8498     | 7054     | 9741     | 8489     | 9222     | 8921     | 13138    | 9073     | 11352    | 9433     | 8966     |
| DG | DG 38:0 DG 18:0_20:0 | 670.62921 | [M+NH4] <sup>+</sup> | 6.907 | 149249   | 194840   | 204228   | 164205   | 192813   | 197846   | 142519   | 182666   | 241863   | 198324   | 200564   | 234584   | 187618   | 231864   | 191323   | 194362   |
| DG | DG 38:2              | 671.56555 | [M+Na] <sup>+</sup>  | 6.477 | 3247     | 7415     | 6792     | 18920    | 22942    | 1619     | 9120     | 3680     | 18005    | 8956     | 14453    | 8714     | 24250    | 22789    | 2952     | 3573     |
| DG | DG 38:2 DG 18:1_20:1 | 666.6004  | [M+NH4] <sup>+</sup> | 5.997 | 135144   | 260006   | 31803    | 114779   | 341757   | 157788   | 216931   | 115736   | 129694   | 71746    | 192391   | 72987    | 163903   | 182540   | 61632    | 27418    |
| DG | DG 38:3              | 669.55151 | [M+Na] <sup>+</sup>  | 6.175 | 8100     | 19243    | 30977    | 29123    | 21668    | 12381    | 1348     | 40611    | 40763    | 15731    | 34807    | 22454    | 47570    | 32558    | 18535    | 12693    |
| DG | DG 38:3 DG 18:0_20:3 | 664.58258 | [M+NH4] <sup>+</sup> | 6.157 | 15810    | 47809    | 75131    | 49607    | 34879    | 17352    | 11613    | 70372    | 46128    | 29663    | 60160    | 30180    | 67082    | 49708    | 25058    | 33722    |
| DG | DG 38:4              | 667.52704 | [M+Na] <sup>+</sup>  | 5.955 | 10047    | 108201   | 328840   | 127498   | 65798    | 31930    | 17219    | 361068   | 206195   | 167888   | 467077   | 163132   | 245505   | 262219   | 61743    | 73618    |
| DG | DG 38:4 DG 18:0_20:4 | 662.5708  | [M+NH4] <sup>+</sup> | 5.959 | 31685    | 332460   | 43083    | 263016   | 197710   | 70100    | 45300    | 625746   | 338886   | 238194   | 701005   | 245220   | 440400   | 396654   | 95318    | 103218   |
| DG | DG 38:8              | 659.46954 | [M+Na] <sup>+</sup>  | 5.734 | 1477     | 454      | 232      | 273      | 878      | 263      | 255      | 419      | 813      | 228      | 756      | 1272     | 915      | 1470     | 830      | 260      |
| DG | DG 40:4              | 695.55469 | [M+Na] <sup>+</sup>  | 6.347 | 2733     | 8754     | 19655    | 13033    | 10588    | 1882     | 3561     | 23377    | 18036    | 13787    | 25826    | 14563    | 19320    | 20906    | 8943     | 8047     |
| DG | DG 40:4 DG 18:0_22:4 | 690.59943 | [M+NH4] <sup>+</sup> | 5.96  | 11192    | 45351    | 51063    | 42431    | 28718    | 17199    | 11258    | 77764    | 56084    | 43301    | 89576    | 42993    | 60537    | 59959    | 19673    | 21008    |
| DG | DG 40:5              | 693.53912 | [M+Na] <sup>+</sup>  | 6.26  | 1063     | 2683     | 2067     | 21368    | 892      | 3411     | 657      | 26687    | 24542    | 1096     | 26479    | 23995    | 29104    | 27905    | 1528     | 991      |
| DG | DG 40:5 DG 18:0_22:5 | 688.58411 | [M+NH4] <sup>+</sup> | 5.963 | 1059     | 7231     | 5891     | 25378    | 13507    | 1596     | 0        | 30400    | 25858    | 12998    | 30818    | 22495    | 34442    | 30765    | 5483     | 3439     |
| DG | DG 42:4              | 723.59015 | [M+Na] <sup>+</sup>  | 7.209 | 110724   | 115339   | 70552    | 123419   | 70118    | 108487   | 65295    | 128016   | 111713   | 122214   | 127734   | 127351   | 120735   | 133305   | 148967   | 130248   |
| DG | DG 43:1              | 743.66412 | [M+Na] <sup>+</sup>  | 7.568 | 23343    | 16526    | 23466    | 11213    | 25084    | 19112    | 21480    | 24169    | 13264    | 13131    | 16181    | 20127    | 6582     | 20038    | 16197    | 12844    |
| DG | DG 43:6              | 733.57062 | [M+Na] <sup>+</sup>  | 7.38  | 1869     | 3427     | 1609     | 21696    | 2445     | 3580     | 6934     | 27754    | 5093     | 5285     | 2471     | 3188     | 2623     | 3257     | 5604     | 1854     |
| DG | DG 43:7              | 731.5567  | [M+Na] <sup>+</sup>  | 7.127 | 22993    | 17007    | 904      | 25848    | 20394    | 15275    | 18879    | 20742    | 1659     | 1780     | 4644     | 2275     | 15662    | 2134     | 12132    | 836      |
| DG | DG 44:6              | 747.59998 | [M+Na] <sup>+</sup>  | 6.106 | 43626    | 33050    | 855774   | 17074    | 22896    | 37157    | 25230    | 19204    | 15286    | 23382    | 18521    | 36429    | 27425    | 19805    | 28046    | 16841    |
| DG | DG 45:10             | 753.55701 | [M+Na] <sup>+</sup>  | 4.714 | 140613   | 133951   | 11236    | 121581   | 242135   | 208408   | 90786    | 67070    | 207383   | 110078   | 240870   | 168949   | 230993   | 110673   | 286625   | 252443   |
| DG | DG 45:12             | 749.50684 | [M+Na] <sup>+</sup>  | 3.036 | 11552    | 15077    | 539      | 11359    | 14464    | 11779    | 8275     | 11790    | 12146    | 12164    | 13104    | 14945    | 10351    | 13900    | 14451    | 902      |
| DG | DG 45:6              | 761.59766 | [M+Na] <sup>+</sup>  | 7.856 | 29183    | 25025    | 2509     | 24588    | 42480    | 32805    | 32077    | 42793    | 35399    | 19191    | 15056    | 22646    | 29114    | 25345    | 15865    | 40491    |
| DG | DG 45:7              | 759.59369 | [M+Na] <sup>+</sup>  | 7.645 | 2258     | 1433     | 1707     | 1731     | 42727    | 5524     | 22844    | 43242    | 805      | 1942     | 2177     | 1457     | 8472     | 1031     | 2167     | 0        |
| DG | DG 45:8              | 757.57074 | [M+Na] <sup>+</sup>  | 7.193 | 33874    | 39026    | 516      | 35842    | 33519    | 18673    | 29322    | 44353    | 3303     | 8341     | 17104    | 5780     | 27959    | 9684     | 16597    | 12479    |
| DG | DG 46:1 DG 15:0_31:1 | 780.75781 | [M+NH4] <sup>+</sup> | 8.354 | 2230     | 4165     | 4106     | 3544     | 3619     | 3237     | 3430     | 5950     | 2397     | 4665     | 4067     | 5394     | 4182     | 7476     | 1186     | 5849     |
| DG | DG 46:11             | 765.5528  | [M+Na] <sup>+</sup>  | 4.769 | 242023   | 293353   | 7286     | 288393   | 95588    | 10551    | 265415   | 281260   | 214831   | 174236   | 214649   | 301591   | 271993   | 197317   | 257255   | 283821   |

|    |                      |           |                                   |       |        |        |        |        |        |        |        |        |        |        |        |        |        |        |        |        |
|----|----------------------|-----------|-----------------------------------|-------|--------|--------|--------|--------|--------|--------|--------|--------|--------|--------|--------|--------|--------|--------|--------|--------|
| DG | DG 46:8              | 771.59521 | [M+Na] <sup>+</sup>               | 4.428 | 53166  | 42868  | 2638   | 34309  | 58346  | 11071  | 9729   | 16288  | 20973  | 19902  | 43386  | 29183  | 30459  | 27442  | 2774   | 11458  |
| DG | DG 46:9              | 769.58881 | [M+Na] <sup>+</sup>               | 6.446 | 15080  | 10052  | 8011   | 7822   | 16050  | 5850   | 9232   | 5917   | 11368  | 4997   | 24314  | 18364  | 10291  | 12859  | 4125   | 3111   |
| DG | DG 47:0              | 801.74585 | [M+Na] <sup>+</sup>               | 8.341 | 1177   | 898    | 900    | 1181   | 1505   | 2026   | 893    | 1191   | 1198   | 1194   | 596    | 1597   | 1788   | 1492   | 598    | 2766   |
| DG | DG 47:1 DG 14:0_33:1 | 794.76147 | [M+NH <sub>4</sub> ] <sup>+</sup> | 8.761 | 1494   | 889    | 1696   | 5350   | 1197   | 2333   | 4264   | 1188   | 1500   | 2623   | 2506   | 2434   | 993    | 1510   | 2704   | 1401   |
| DG | DG 47:6              | 789.63184 | [M+Na] <sup>+</sup>               | 8.189 | 33583  | 28826  | 30679  | 38200  | 40209  | 49950  | 39378  | 49328  | 39945  | 43474  | 44949  | 51436  | 36951  | 52072  | 52180  | 43801  |
| DG | DG 47:7              | 787.61664 | [M+Na] <sup>+</sup>               | 7.89  | 91862  | 92136  | 72081  | 103235 | 119739 | 86812  | 87897  | 121627 | 52100  | 67526  | 81605  | 49164  | 100662 | 78080  | 84978  | 67797  |
| DG | DG 47:8              | 785.60022 | [M+Na] <sup>+</sup>               | 7.591 | 84731  | 111631 | 74445  | 108919 | 112005 | 52626  | 82324  | 125428 | 23581  | 32466  | 58514  | 23470  | 87132  | 45381  | 50259  | 46398  |
| DG | DG 47:9              | 783.58551 | [M+Na] <sup>+</sup>               | 7.227 | 23696  | 35900  | 896    | 35003  | 30568  | 3123   | 22510  | 38491  | 4647   | 4845   | 16448  | 4410   | 25973  | 7295   | 13513  | 13786  |
| DG | DG 48:0              | 815.75891 | [M+Na] <sup>+</sup>               | 8.934 | 199    | 2392   | 945    | 1069   | 1508   | 1794   | 1988   | 348    | 2479   | 1669   | 1144   | 1694   | 2967   | 600    | 1607   | 599    |
| DG | DG 48:1              | 813.75128 | [M+Na] <sup>+</sup>               | 8.92  | 4100   | 2692   | 30920  | 1143   | 1075   | 3495   | 4929   | 2451   | 839    | 6807   | 1967   | 3151   | 1983   | 4868   | 4332   | 3610   |
| DG | DG 48:13             | 789.54791 | [M+Na] <sup>+</sup>               | 4.555 | 8756   | 13937  | 14255  | 54057  | 77127  | 7557   | 21154  | 3897   | 6726   | 44387  | 95001  | 61289  | 10307  | 124845 | 5175   | 5632   |
| DG | DG 48:6              | 803.64728 | [M+Na] <sup>+</sup>               | 8.538 | 1701   | 7856   | 1928   | 1830   | 1013   | 6296   | 1038   | 930    | 9994   | 1190   | 733    | 1190   | 436    | 892    | 3870   | 972    |
| DG | DG 48:9              | 797.61749 | [M+Na] <sup>+</sup>               | 5.654 | 183540 | 9683   | 102892 | 86229  | 379747 | 136164 | 88544  | 226408 | 104761 | 182715 | 248916 | 149100 | 111701 | 143802 | 9324   | 111248 |
| DG | DG 49:0              | 829.77686 | [M+Na] <sup>+</sup>               | 8.836 | 2113   | 1272   | 3206   | 2100   | 8862   | 2389   | 2621   | 2398   | 925    | 2415   | 5321   | 2412   | 7443   | 4488   | 2924   | 3909   |
| DG | DG 49:10             | 809.60059 | [M+Na] <sup>+</sup>               | 7.098 | 1664   | 21786  | 435    | 19437  | 16888  | 1765   | 1340   | 21577  | 627    | 1038   | 334    | 872    | 1432   | 598    | 553    | 644    |
| DG | DG 49:12             | 805.57239 | [M+Na] <sup>+</sup>               | 5.218 | 8817   | 6259   | 14185  | 6830   | 7775   | 2749   | 13039  | 10339  | 12484  | 3287   | 18230  | 8099   | 18038  | 10633  | 12046  | 4845   |
| DG | DG 49:6              | 817.66302 | [M+Na] <sup>+</sup>               | 8.49  | 30904  | 24465  | 24248  | 31711  | 39137  | 43162  | 33881  | 35905  | 51476  | 42693  | 32747  | 61625  | 40925  | 60768  | 37949  | 37488  |
| DG | DG 49:7              | 815.65076 | [M+Na] <sup>+</sup>               | 8.21  | 97795  | 86045  | 89783  | 115223 | 122523 | 100828 | 113342 | 138350 | 67315  | 92702  | 91984  | 84992  | 104551 | 103295 | 106199 | 90007  |
| DG | DG 49:8              | 813.63196 | [M+Na] <sup>+</sup>               | 7.92  | 157773 | 149979 | 123845 | 162306 | 175716 | 106078 | 145688 | 195773 | 60423  | 78755  | 112740 | 61571  | 137089 | 92773  | 106809 | 96375  |
| DG | DG 49:9              | 811.61438 | [M+Na] <sup>+</sup>               | 7.623 | 68296  | 90219  | 66522  | 86066  | 79500  | 30248  | 56499  | 104088 | 18331  | 24510  | 39347  | 19048  | 68587  | 31407  | 25438  | 33976  |
| DG | DG 50:0              | 843.76489 | [M+Na] <sup>+</sup>               | 9.151 | 1044   | 596    | 1545   | 787    | 6565   | 1790   | 3887   | 3277   | 1202   | 1069   | 4411   | 1368   | 7594   | 6977   | 3688   | 1302   |
| DG | DG 50:1              | 841.78174 | [M+Na] <sup>+</sup>               | 8.931 | 29218  | 7802   | 3085   | 30458  | 40964  | 30792  | 30536  | 32061  | 3449   | 17371  | 26435  | 32140  | 4583   | 20236  | 18537  | 29224  |
| DG | DG 50:10             | 823.63324 | [M+Na] <sup>+</sup>               | 5.812 | 5174   | 20546  | 38588  | 3611   | 7738   | 7400   | 6413   | 28867  | 9720   | 8307   | 6732   | 5306   | 57617  | 4613   | 56944  | 6934   |
| DG | DG 50:11             | 821.61523 | [M+Na] <sup>+</sup>               | 5.448 | 51086  | 24138  | 16559  | 9625   | 28185  | 42172  | 18194  | 18222  | 34206  | 33332  | 40364  | 37067  | 47258  | 4241   | 23169  | 7756   |
| DG | DG 50:14             | 815.56903 | [M+Na] <sup>+</sup>               | 4.745 | 28266  | 5798   | 14115  | 9262   | 30155  | 22905  | 22025  | 10407  | 34010  | 8722   | 6262   | 41512  | 23165  | 47070  | 11337  | 10283  |
| DG | DG 50:2              | 839.74554 | [M+Na] <sup>+</sup>               | 8.558 | 19612  | 28165  | 3734   | 38581  | 26308  | 15566  | 27441  | 33222  | 9568   | 16097  | 17442  | 7926   | 32858  | 20058  | 12286  | 21503  |
| DG | DG 50:2 DG 16:1_34:1 | 834.77966 | [M+NH <sub>4</sub> ] <sup>+</sup> | 8.998 | 68206  | 96173  | 118847 | 102570 | 120949 | 29114  | 50175  | 54106  | 50990  | 44852  | 30372  | 53267  | 50802  | 22887  | 2152   | 17916  |
| DG | DG 50:3              | 837.72742 | [M+Na] <sup>+</sup>               | 8.315 | 18568  | 25798  | 1745   | 25317  | 18375  | 2308   | 14368  | 22108  | 2871   | 5505   | 10211  | 1878   | 23882  | 4791   | 5811   | 7365   |

|         |                          |           |                      |       |                    |        |        |        |        |        |        |        |        |        |        |        |        |        |        |        |
|---------|--------------------------|-----------|----------------------|-------|--------------------|--------|--------|--------|--------|--------|--------|--------|--------|--------|--------|--------|--------|--------|--------|--------|
| DG      | DG 50:3 DG 18:1_32:2     | 832.76562 | [M+NH4] <sup>+</sup> | 8.921 | 29931              | 49692  | 40806  | 51334  | 52417  | 15361  | 35980  | 45173  | 13810  | 26347  | 24243  | 12182  | 25211  | 22841  | 10448  | 22471  |
| DG      | DG 50:4                  | 835.71655 | [M+Na] <sup>+</sup>  | 7.514 | 1413               | 1298   | 14390  | 46201  | 30199  | 1552   | 13717  | 33646  | 7052   | 10530  | 11332  | 3704   | 24703  | 9449   | 2483   | 1610   |
| DG      | DG 50:6                  | 831.67621 | [M+Na] <sup>+</sup>  | 8.65  | 13670              | 6694   | 892    | 15008  | 9014   | 11097  | 7997   | 17440  | 24560  | 19389  | 15639  | 20716  | 13174  | 7038   | 10932  | 17806  |
| DG      | DG 51:10                 | 837.63147 | [M+Na] <sup>+</sup>  | 7.681 | 50828              | 85866  | 65573  | 81159  | 69999  | 22236  | 40848  | 92421  | 15137  | 19353  | 31538  | 16083  | 72206  | 27508  | 22371  | 28692  |
| DG      | DG 51:2                  | 853.7699  | [M+Na] <sup>+</sup>  | 8.294 | 2194               | 6254   | 2442   | 990    | 2198   | 4260   | 1484   | 4245   | 1604   | 5030   | 3259   | 1697   | 899    | 3491   | 6508   | 1681   |
| DG      | DG 51:3                  | 851.75165 | [M+Na] <sup>+</sup>  | 8.024 | 1388               | 1381   | 4714   | 1887   | 1300   | 2082   | 1286   | 1682   | 1746   | 1003   | 1090   | 1513   | 6851   | 7651   | 993    | 3553   |
| DG      | DG 51:4                  | 849.73871 | [M+Na] <sup>+</sup>  | 7.689 | 1490               | 949    | 3564   | 1043   | 11988  | 5493   | 6079   | 10573  | 2275   | 1237   | 3211   | 2691   | 12892  | 1132   | 934    | 7317   |
| DG      | DG 51:6                  | 845.69141 | [M+Na] <sup>+</sup>  | 8.76  | 30963              | 23878  | 1823   | 36473  | 39772  | 31057  | 41094  | 38342  | 50231  | 27704  | 37115  | 57708  | 35829  | 61495  | 30156  | 28368  |
| DG      | DG 51:7                  | 843.6778  | [M+Na] <sup>+</sup>  | 8.503 | 12076 <sub>8</sub> | 99501  | 97910  | 124936 | 128546 | 117202 | 118265 | 133493 | 99363  | 112634 | 114618 | 105628 | 127113 | 129261 | 141664 | 113568 |
| DG      | DG 51:8                  | 841.66132 | [M+Na] <sup>+</sup>  | 8.238 | 23157 <sub>8</sub> | 205453 | 188842 | 240855 | 249669 | 208673 | 244237 | 242648 | 137174 | 170359 | 212855 | 151349 | 229919 | 185676 | 216544 | 205339 |
| DG      | DG 51:9                  | 839.64807 | [M+Na] <sup>+</sup>  | 7.959 | 18563 <sub>8</sub> | 207627 | 164681 | 221255 | 213983 | 100219 | 174411 | 229421 | 65778  | 87411  | 132217 | 66694  | 180015 | 109285 | 112218 | 116044 |
| DG      | DG 52:1                  | 869.78491 | [M+Na] <sup>+</sup>  | 9.321 | 289                | 14097  | 3440   | 13681  | 28833  | 6818   | 2317   | 2608   | 1358   | 15121  | 2368   | 3725   | 805    | 1142   | 920    | 5145   |
| DG      | DG 52:6                  | 859.7074  | [M+Na] <sup>+</sup>  | 8.936 | 18671              | 3810   | 4727   | 7408   | 15572  | 9375   | 14039  | 6752   | 13535  | 15949  | 13281  | 19708  | 17051  | 17420  | 11649  | 9046   |
| DG      | DG 52:7                  | 857.703   | [M+Na] <sup>+</sup>  | 8.568 | 6334               | 14536  | 1804   | 10800  | 8699   | 12205  | 5794   | 13286  | 3527   | 0      | 5132   | 3639   | 2737   | 7279   | 7792   | 5226   |
| EtherDG | DG O-27:1 DG O-13:0_14:1 | 500.46112 | [M+NH4] <sup>+</sup> | 3.963 | 9535               | 10319  | 11533  | 8355   | 7699   | 7417   | 10194  | 12430  | 8266   | 7755   | 8168   | 10411  | 11376  | 9711   | 12825  | 9921   |
| EtherDG | DG O-29:1 DG O-15:0_14:1 | 528.49109 | [M+NH4] <sup>+</sup> | 4.609 | 15631              | 16171  | 13523  | 17916  | 10883  | 8241   | 10449  | 28299  | 16302  | 9745   | 19981  | 7634   | 17216  | 14687  | 17284  | 10519  |
| EtherDG | DG O-31:1 DG O-17:0_14:1 | 556.52618 | [M+NH4] <sup>+</sup> | 5.236 | 35869 <sub>7</sub> | 400941 | 74963  | 370058 | 406542 | 357687 | 276374 | 364696 | 414207 | 413811 | 347079 | 405504 | 342585 | 394661 | 448326 | 450613 |
| EtherDG | DG O-35:1 DG O-17:0_18:1 | 612.58508 | [M+NH4] <sup>+</sup> | 6.741 | 365                | 1495   | 49570  | 700    | 455    | 465    | 298    | 1269   | 489    | 249    | 311    | 200    | 652    | 1878   | 660    | 300    |
| EtherDG | DG O-35:4 DG O-19:3_16:1 | 606.54626 | [M+NH4] <sup>+</sup> | 5.081 | 2723               | 8624   | 1598   | 2391   | 578    | 13888  | 4394   | 865    | 4791   | 1935   | 10680  | 1222   | 1735   | 7095   | 2232   | 13126  |
| EtherDG | DG O-36:2 DG O-20:2_16:0 | 624.59729 | [M+NH4] <sup>+</sup> | 5.438 | 11917              | 14803  | 25562  | 15144  | 19171  | 19129  | 12242  | 8833   | 19292  | 17293  | 15612  | 20397  | 16854  | 14392  | 14263  | 14436  |
| EtherDG | DG O-37:1 DG O-23:0_14:1 | 640.6192  | [M+NH4] <sup>+</sup> | 6.951 | 16521              | 24072  | 32447  | 17621  | 32931  | 22809  | 19131  | 27901  | 30088  | 24405  | 35166  | 24618  | 27512  | 27550  | 29738  | 27254  |
| EtherDG | DG O-37:3 DG O-19:2_18:1 | 636.60114 | [M+NH4] <sup>+</sup> | 5.564 | 1005               | 1277   | 1475   | 1024   | 8241   | 1709   | 746    | 815    | 930    | 1309   | 805    | 575    | 548    | 1118   | 1291   | 836    |
| EtherDG | DG O-45:1 DG O-17:1_28:0 | 752.7583  | [M+NH4] <sup>+</sup> | 8.107 | 4653               | 3297   | 2288   | 2973   | 1270   | 506    | 750    | 1443   | 499    | 1550   | 851    | 831    | 2095   | 898    | 1552   | 869    |
| MG      | MG 18:0                  | 376.34006 | [M+NH4] <sup>+</sup> | 2.25  | 67731              | 75969  | 77111  | 67218  | 76762  | 76616  | 48179  | 82669  | 87495  | 63189  | 79740  | 73699  | 72496  | 89202  | 82682  | 67555  |
| MG      | MG 29:0                  | 530.52344 | [M+NH4] <sup>+</sup> | 5.453 | 7317               | 13693  | 87     | 14315  | 22842  | 15305  | 11487  | 14397  | 17843  | 9292   | 12062  | 16836  | 15659  | 12061  | 12453  | 9427   |
| MG      | MG 31:1                  | 556.52283 | [M+NH4] <sup>+</sup> | 4.52  | 74872              | 77556  | 1018   | 47818  | 69077  | 70101  | 53381  | 71841  | 75884  | 75237  | 63608  | 85100  | 61308  | 76779  | 63032  | 58819  |
| MG      | MG 33:1                  | 584.55646 | [M+NH4] <sup>+</sup> | 5.245 | 48695              | 49897  | 585    | 49903  | 47011  | 53295  | 35589  | 51955  | 53167  | 51533  | 51038  | 56208  | 46363  | 56872  | 53899  | 66494  |

|      |                                    |           |              |       |            |         |         |         |         |        |        |         |        |        |        |        |         |        |        |        |
|------|------------------------------------|-----------|--------------|-------|------------|---------|---------|---------|---------|--------|--------|---------|--------|--------|--------|--------|---------|--------|--------|--------|
| MG   | MG 35:0                            | 614.61328 | [M+NH4]<br>+ | 6.962 | 5468       | 1757    | 965     | 2988    | 479     | 1502   | 243    | 1661    | 2154   | 1306   | 422    | 1550   | 3259    | 509    | 901    | 3622   |
| MG   | MG 35:1                            | 612.58838 | [M+NH4]<br>+ | 6.417 | 42216      | 48601   | 1468    | 43858   | 51474   | 47321  | 35177  | 54508   | 52965  | 45738  | 51393  | 52897  | 55757   | 58073  | 52437  | 49470  |
| MG   | MG 36:2                            | 624.5979  | [M+NH4]<br>+ | 6.021 | 356        | 14917   | 610     | 89      | 553     | 977    | 12242  | 1510    | 530    | 1331   | 3479   | 5800   | 637     | 14293  | 428    | 333    |
| OxTG | TG 46:2;O3 TG<br>14:0_14:0_18:2;O3 | 840.68512 | [M+NH4]<br>+ | 7.395 | 1339       | 1902    | 5307    | 854     | 4027    | 28834  | 1550   | 4942    | 25027  | 12229  | 9848   | 38322  | 1386    | 28524  | 18984  | 36242  |
| OxTG | TG 48:1;O TG<br>16:0_16:0_16:1;O   | 838.74255 | [M+NH4]<br>+ | 6.938 | 9357       | 7801    | 701     | 11728   | 11844   | 7253   | 7258   | 10043   | 15861  | 4881   | 4845   | 3615   | 17624   | 4358   | 6483   | 30667  |
| OxTG | TG 48:1;O TG<br>18:0_18:1_12:0;O   | 838.74097 | [M+NH4]<br>+ | 7.055 | 24282      | 53475   | 2294    | 75724   | 56966   | 23072  | 22472  | 29791   | 7618   | 10222  | 14766  | 3944   | 31167   | 12609  | 38474  | 18565  |
| OxTG | TG 48:1;O3 TG<br>16:0_16:0_16:1;O3 | 870.73694 | [M+NH4]<br>+ | 7.854 | 96113<br>7 | 1266324 | 1069174 | 1416183 | 1038465 | 748670 | 823401 | 1070188 | 740833 | 718979 | 790530 | 668810 | 1037972 | 742219 | 687143 | 825104 |
| OxTG | TG 48:2;O TG<br>15:0_15:0_18:2;O   | 836.72827 | [M+NH4]<br>+ | 7.833 | 2435       | 8370    | 12521   | 85466   | 67313   | 19956  | 29887  | 49172   | 2218   | 25323  | 33496  | 7845   | 46701   | 21642  | 11585  | 2384   |
| OxTG | TG 48:2;O TG<br>16:0_17:0_15:2;O   | 836.72656 | [M+NH4]<br>+ | 7.059 | 68565      | 93064   | 2932    | 98044   | 129939  | 69226  | 65838  | 66582   | 17795  | 16204  | 44802  | 11505  | 46133   | 38791  | 31100  | 28081  |
| OxTG | TG 48:3;O TG<br>18:1_17:2_13:0;O   | 834.71136 | [M+NH4]<br>+ | 7.577 | 24058      | 44207   | 1036    | 76810   | 54040   | 15827  | 21373  | 50204   | 9719   | 17875  | 23914  | 11746  | 45731   | 16272  | 16443  | 7528   |
| OxTG | TG 49:3;O TG<br>17:1_17:1_15:1;O   | 848.73175 | [M+NH4]<br>+ | 6.897 | 5931       | 8366    | 1805    | 13306   | 8947    | 1903   | 3794   | 11412   | 1519   | 4051   | 3033   | 4560   | 22101   | 12891  | 5602   | 3698   |
| OxTG | TG 49:4;O TG<br>16:0_16:1_17:3;O   | 846.70001 | [M+NH4]<br>+ | 8.728 | 10819      | 4518    | 1565    | 5347    | 25709   | 11561  | 16698  | 2871    | 7242   | 5748   | 14624  | 14507  | 8542    | 14583  | 5374   | 767    |
| OxTG | TG 49:4;O TG<br>16:1_16:1_17:2;O   | 846.73206 | [M+NH4]<br>+ | 7.498 | 16071      | 40695   | 788     | 1059    | 47381   | 10949  | 13378  | 1230    | 3290   | 1928   | 11638  | 4312   | 34831   | 3482   | 6046   | 531    |
| OxTG | TG 49:4;O2 TG<br>16:2_18:2_15:0;O2 | 862.72064 | [M+NH4]<br>+ | 8.165 | 2744       | 1898    | 10610   | 1686    | 0       | 1190   | 891    | 891     | 623    | 1737   | 1492   | 743    | 2631    | 595    | 993    | 1782   |
| OxTG | TG 49:6;O TG<br>14:1_18:2_17:3;O   | 842.70117 | [M+NH4]<br>+ | 7.516 | 47558<br>1 | 451302  | 476473  | 478272  | 439696  | 465163 | 475908 | 472060  | 527632 | 455800 | 449377 | 491134 | 447774  | 458077 | 440077 | 453152 |
| OxTG | TG 50:1;O TG<br>16:0_18:1_16:0;O   | 866.77277 | [M+NH4]<br>+ | 7.346 | 11153<br>7 | 102285  | 892     | 184782  | 105506  | 133747 | 78438  | 83132   | 5716   | 4117   | 44762  | 5202   | 96404   | 29828  | 31216  | 47417  |
| OxTG | TG 50:2;O TG<br>16:0_16:1_18:1;O   | 864.75983 | [M+NH4]<br>+ | 7.535 | 15347<br>9 | 203341  | 100150  | 573074  | 389597  | 113665 | 131535 | 249321  | 4489   | 42851  | 90961  | 6061   | 179340  | 87696  | 79387  | 66231  |
| OxTG | TG 50:2;O TG<br>16:0_18:1_16:1;O   | 864.75934 | [M+NH4]<br>+ | 7.225 | 13739<br>3 | 204621  | 42705   | 226892  | 233864  | 169919 | 142766 | 159224  | 10260  | 22180  | 66716  | 6678   | 135083  | 33146  | 86372  | 74521  |
| OxTG | TG 50:2;O TG<br>16:1_16:1_18:0;O   | 864.75879 | [M+NH4]<br>+ | 7.029 | 10201<br>1 | 105371  | 297     | 182144  | 158385  | 74011  | 97064  | 110695  | 13072  | 21497  | 60152  | 12274  | 71760   | 29495  | 62011  | 30726  |

|      |                                  |           |              |       |            |         |        |         |        |        |        |        |        |        |        |        |        |        |        |        |
|------|----------------------------------|-----------|--------------|-------|------------|---------|--------|---------|--------|--------|--------|--------|--------|--------|--------|--------|--------|--------|--------|--------|
| OxTG | TG 50:3;O TG<br>16:0_16:1_18:2;O | 862.74646 | [M+NH4]<br>+ | 7.156 | 10676<br>7 | 321106  | 56684  | 468979  | 176290 | 50686  | 73843  | 217676 | 10727  | 35761  | 52774  | 8909   | 236597 | 70663  | 59466  | 37231  |
| OxTG | TG 50:4;O TG<br>15:0_17:1_18:3;O | 860.72766 | [M+NH4]<br>+ | 6.919 | 26103      | 86299   | 2021   | 80512   | 65834  | 18273  | 14339  | 45698  | 11577  | 9198   | 27369  | 4285   | 81945  | 18845  | 9490   | 28535  |
| OxTG | TG 50:4;O TG<br>17:0_18:2_15:2;O | 860.73175 | [M+NH4]<br>+ | 6.598 | 7034       | 905     | 211    | 24504   | 18692  | 7481   | 15484  | 20192  | 1404   | 7993   | 5691   | 366    | 18386  | 606    | 9395   | 7695   |
| OxTG | TG 50:4;O TG<br>17:1_18:2_15:1;O | 860.72864 | [M+NH4]<br>+ | 7.324 | 1102       | 2046    | 2713   | 2602    | 1467   | 585    | 1176   | 23648  | 463    | 7945   | 418    | 1251   | 773    | 542    | 970    | 6995   |
| OxTG | TG 50:5;O TG<br>15:0_18:2_17:3;O | 858.73322 | [M+NH4]<br>+ | 8.1   | 4849       | 4995    | 9795   | 9684    | 22927  | 4528   | 3601   | 45014  | 3137   | 6430   | 14890  | 6622   | 9123   | 22643  | 10580  | 6121   |
| OxTG | TG 51:0;O TG<br>17:0_17:0_17:0;O | 882.82367 | [M+NH4]<br>+ | 9.053 | 13125<br>6 | 180446  | 2916   | 177273  | 188242 | 140631 | 128631 | 153879 | 67731  | 87249  | 104238 | 56845  | 128436 | 113220 | 88502  | 119571 |
| OxTG | TG 51:5;O TG<br>16:0_18:2_17:3;O | 872.72174 | [M+NH4]<br>+ | 8.733 | 26138      | 72739   | 2200   | 34390   | 23636  | 31893  | 34650  | 87493  | 49711  | 2598   | 89623  | 66792  | 64965  | 37696  | 60201  | 56325  |
| OxTG | TG 51:5;O TG<br>18:2_18:2_15:1;O | 872.74371 | [M+NH4]<br>+ | 7.652 | 8779       | 3645    | 0      | 44370   | 1915   | 13379  | 87516  | 8341   | 3427   | 3883   | 49188  | 6088   | 37258  | 5162   | 4838   | 101979 |
| OxTG | TG 52:2;O TG<br>16:0_16:0_20:2;O | 892.79205 | [M+NH4]<br>+ | 7.091 | 18633      | 53113   | 403    | 456003  | 23695  | 35638  | 6372   | 44340  | 3473   | 1734   | 4725   | 1248   | 32074  | 2755   | 6962   | 23336  |
| OxTG | TG 52:2;O TG<br>19:0_18:1_15:1;O | 892.79102 | [M+NH4]<br>+ | 7.789 | 21158<br>5 | 419383  | 118165 | 469926  | 571759 | 60542  | 170310 | 349107 | 26610  | 63248  | 154998 | 24710  | 243338 | 113317 | 157286 | 104089 |
| OxTG | TG 52:3;O TG<br>16:0_18:1_18:2;O | 890.77704 | [M+NH4]<br>+ | 7.328 | 60894<br>2 | 1096766 | 2489   | 511432  | 927697 | 777194 | 553102 | 675717 | 41107  | 71291  | 240441 | 13788  | 503656 | 110562 | 367214 | 313502 |
| OxTG | TG 52:3;O TG<br>16:0_19:1_17:2;O | 890.77966 | [M+NH4]<br>+ | 7.513 | 43011<br>2 | 1065179 | 6455   | 1466424 | 882089 | 373147 | 344879 | 661562 | 52831  | 71877  | 269005 | 29301  | 725977 | 118431 | 231737 | 239622 |
| OxTG | TG 52:4;O TG<br>16:0_18:2_18:2;O | 888.76215 | [M+NH4]<br>+ | 7.021 | 19691<br>5 | 418759  | 409    | 341327  | 269170 | 132476 | 150142 | 249965 | 14460  | 28254  | 81730  | 6907   | 156431 | 38704  | 97200  | 111419 |
| OxTG | TG 52:4;O TG<br>17:0_18:2_17:2;O | 888.76178 | [M+NH4]<br>+ | 7.253 | 10001<br>1 | 385931  | 262429 | 892524  | 181726 | 50639  | 66204  | 194038 | 13861  | 26110  | 57133  | 7300   | 332449 | 44618  | 25684  | 57305  |
| OxTG | TG 52:5;O TG<br>17:1_18:2_17:2;O | 886.74323 | [M+NH4]<br>+ | 6.945 | 18972      | 52078   | 57827  | 93240   | 27193  | 9339   | 9892   | 38019  | 10586  | 9387   | 14583  | 4781   | 60191  | 16221  | 7183   | 21000  |
| OxTG | TG 52:5;O TG<br>18:2_18:2_16:1;O | 886.74261 | [M+NH4]<br>+ | 6.61  | 12021      | 29172   | 304    | 1699    | 28398  | 7093   | 6580   | 16447  | 1307   | 1486   | 4195   | 888    | 21598  | 1270   | 7131   | 11791  |
| OxTG | TG 52:6;O TG<br>18:1_17:3_17:2;O | 884.74744 | [M+NH4]<br>+ | 7.733 | 1008       | 69851   | 919    | 50885   | 187745 | 267470 | 172913 | 234964 | 316349 | 327284 | 285188 | 311312 | 4813   | 31205  | 222594 | 24589  |
| TG   | TG 24:0 TG<br>8:0_8:0_8:0        | 488.38705 | [M+NH4]<br>+ | 8.643 | 23020      | 22457   | 21838  | 6390    | 19544  | 9121   | 20478  | 11497  | 14453  | 14814  | 9056   | 13536  | 16095  | 18475  | 22225  | 19675  |
| TG   | TG 36:0 TG<br>12:0_12:0_12:0     | 656.58551 | [M+NH4]<br>+ | 6.359 | 32921      | 15531   | 1341   | 31652   | 19773  | 37229  | 9897   | 85480  | 19191  | 31707  | 35039  | 23145  | 20939  | 16123  | 33986  | 32966  |



|    |                           |           |                      |       |             |         |         |         |         |         |         |         |         |         |         |         |         |         |         |         |
|----|---------------------------|-----------|----------------------|-------|-------------|---------|---------|---------|---------|---------|---------|---------|---------|---------|---------|---------|---------|---------|---------|---------|
| TG | TG 38:2 TG 10:0 10:0 18:2 | 680.57507 | [M+NH4] <sup>+</sup> | 6.428 | 47032       | 37275   | 25462   | 50528   | 36919   | 43836   | 41986   | 31452   | 47877   | 37630   | 56612   | 29998   | 51809   | 27285   | 58285   | 42437   |
| TG | TG 39:0 TG 9:0 13:0 17:0  | 698.6214  | [M+NH4] <sup>+</sup> | 6.899 | 19553       | 24886   | 3873    | 22588   | 27425   | 19961   | 24487   | 32387   | 15748   | 25442   | 30788   | 22909   | 24507   | 29252   | 19764   | 28773   |
| TG | TG 40:0 TG 10:0 14:0 16:0 | 712.6438  | [M+NH4] <sup>+</sup> | 7.496 | 40483<br>2  | 504048  | 4477    | 619236  | 608146  | 357903  | 456871  | 695457  | 238815  | 259169  | 311818  | 219968  | 462291  | 339608  | 288246  | 294347  |
| TG | TG 40:0 TG 12:0 12:0 16:0 | 712.63824 | [M+NH4] <sup>+</sup> | 8.394 | 16301       | 16364   | 342954  | 5218    | 8845    | 5682    | 4610    | 13637   | 6649    | 15453   | 9251    | 19463   | 12052   | 16646   | 11801   | 8446    |
| TG | TG 40:0 TG 12:0 14:0 14:0 | 717.59943 | [M+Na] <sup>+</sup>  | 7.482 | 75680       | 70869   | 25966   | 78632   | 84076   | 58991   | 79255   | 90130   | 48941   | 53337   | 78285   | 83172   | 79230   | 76931   | 88110   | 87357   |
| TG | TG 40:0 TG 8:0 14:0 18:0  | 712.63556 | [M+NH4] <sup>+</sup> | 9.001 | 8164        | 8760    | 10208   | 19813   | 4747    | 11501   | 5021    | 14854   | 13818   | 9296    | 5009    | 7391    | 3240    | 10803   | 8197    | 7946    |
| TG | TG 40:0 TG 9:0 9:0 22:0   | 712.63489 | [M+NH4] <sup>+</sup> | 6.898 | 2132        | 12548   | 7762    | 7959    | 4510    | 14625   | 11217   | 7899    | 9221    | 4053    | 4168    | 14564   | 5263    | 13622   | 8444    | 6703    |
| TG | TG 40:1 TG 12:0 12:0 16:1 | 715.5824  | [M+Na] <sup>+</sup>  | 7.13  | 67530       | 68848   | 8004    | 72188   | 70749   | 42196   | 64982   | 68773   | 14084   | 15792   | 31912   | 11246   | 53821   | 28237   | 44981   | 7322    |
| TG | TG 40:1 TG 8:0 14:0 18:1  | 710.62714 | [M+NH4] <sup>+</sup> | 7.14  | 48277<br>8  | 426642  | 154863  | 561259  | 416287  | 285167  | 379873  | 440889  | 85700   | 92836   | 172897  | 77507   | 305397  | 141173  | 233988  | 161482  |
| TG | TG 40:2 TG 8:0 16:1 16:1  | 708.60828 | [M+NH4] <sup>+</sup> | 6.805 | 16305<br>7  | 159373  | 74173   | 181774  | 74517   | 57402   | 86819   | 118078  | 12849   | 41159   | 45359   | 13681   | 69405   | 7517    | 41565   | 9894    |
| TG | TG 41:0 TG 12:0 13:0 16:0 | 726.65564 | [M+NH4] <sup>+</sup> | 7.663 | 15652<br>1  | 63211   | 143168  | 76995   | 107450  | 91030   | 152385  | 83812   | 86032   | 153261  | 155425  | 159478  | 93125   | 157640  | 153626  | 154758  |
| TG | TG 42:0 TG 12:0 14:0 16:0 | 740.67456 | [M+NH4] <sup>+</sup> | 7.859 | 11167<br>25 | 1308784 | 37905   | 1603442 | 1717512 | 1125474 | 1312810 | 1931227 | 701562  | 760530  | 955078  | 699179  | 1260708 | 1140404 | 886696  | 893683  |
| TG | TG 42:0 TG 14:0 14:0 14:0 | 745.62689 | [M+Na] <sup>+</sup>  | 7.865 | 70319       | 52560   | 91346   | 67485   | 96844   | 95050   | 92636   | 96407   | 79149   | 85878   | 95166   | 92705   | 92425   | 114607  | 102016  | 98227   |
| TG | TG 42:1 TG 10:0 16:0 16:1 | 738.6593  | [M+NH4] <sup>+</sup> | 7.538 | 20633<br>63 | 2246678 | 929740  | 2721968 | 2311568 | 1175290 | 1790696 | 2458970 | 296323  | 411820  | 771700  | 257574  | 1394859 | 575367  | 826101  | 619490  |
| TG | TG 42:1 TG 12:0 12:0 18:1 | 743.61664 | [M+Na] <sup>+</sup>  | 7.533 | 14481<br>9  | 165276  | 114240  | 163250  | 179794  | 96848   | 141616  | 204528  | 2952    | 29467   | 75077   | 2621    | 130773  | 56341   | 88714   | 67737   |
| TG | TG 42:2 TG 10:0 16:1 16:1 | 741.59827 | [M+Na] <sup>+</sup>  | 7.195 | 93273       | 113739  | 69854   | 115178  | 95250   | 51522   | 82227   | 134141  | 4770    | 18611   | 43650   | 11057   | 81828   | 29183   | 47568   | 34987   |
| TG | TG 42:2 TG 8:0 16:1 18:1  | 736.6438  | [M+NH4] <sup>+</sup> | 7.208 | 77023<br>8  | 1007625 | 312019  | 1081838 | 712612  | 344952  | 625110  | 960463  | 80166   | 108224  | 233182  | 58834   | 521583  | 150028  | 244595  | 189964  |
| TG | TG 42:3 TG 8:0 10:0 24:3  | 734.62421 | [M+NH4] <sup>+</sup> | 6.873 | 79718       | 113100  | 40713   | 114712  | 68262   | 48372   | 57696   | 95382   | 12910   | 20537   | 36006   | 4545    | 70782   | 20533   | 31594   | 28532   |
| TG | TG 43:0 TG 13:0 14:0 16:0 | 754.68787 | [M+NH4] <sup>+</sup> | 8.006 | 48650<br>6  | 440925  | 451547  | 445961  | 441916  | 573720  | 518612  | 501741  | 607051  | 566289  | 521312  | 531613  | 442596  | 558227  | 585120  | 530519  |
| TG | TG 43:1 TG 13:0 13:0 17:1 | 752.66791 | [M+NH4] <sup>+</sup> | 8.067 | 15222       | 6815    | 234110  | 14556   | 19288   | 4612    | 8955    | 21428   | 8361    | 10760   | 15083   | 12870   | 22295   | 6940    | 7532    | 16105   |
| TG | TG 43:1 TG 14:0 15:0 14:1 | 752.67242 | [M+NH4] <sup>+</sup> | 7.713 | 24779<br>4  | 301278  | 3376    | 311257  | 297499  | 256852  | 241027  | 276801  | 197364  | 211626  | 231794  | 199632  | 232858  | 236251  | 223911  | 212089  |
| TG | TG 43:2 TG 9:0 16:0 18:2  | 750.65649 | [M+NH4] <sup>+</sup> | 7.403 | 63839       | 109068  | 72020   | 116314  | 89766   | 51920   | 74330   | 84925   | 39092   | 54827   | 51386   | 48714   | 75604   | 66824   | 57581   | 46423   |
| TG | TG 44:0 TG 14:0 14:0 16:0 | 768.70514 | [M+NH4] <sup>+</sup> | 8.182 | 30619<br>56 | 3562542 | 96749   | 4168564 | 5005359 | 2985107 | 3473976 | 5549296 | 2147010 | 2232034 | 2673454 | 2554708 | 3628181 | 3644690 | 2353478 | 2537376 |
| TG | TG 44:1 TG 10:0 16:0 18:1 | 766.6911  | [M+NH4] <sup>+</sup> | 7.89  | 64154<br>54 | 7581680 | 4058650 | 9089954 | 8473755 | 4247192 | 5852486 | 8960455 | 1522216 | 2291311 | 3339102 | 1504977 | 5194932 | 2952499 | 3124081 | 2906952 |
| TG | TG 44:1 TG 13:0 13:0 18:1 | 771.64386 | [M+Na] <sup>+</sup>  | 7.887 | 27364<br>4  | 276523  | 248321  | 279659  | 346285  | 265544  | 300716  | 367712  | 146293  | 198072  | 244417  | 157903  | 274550  | 246222  | 260609  | 234082  |
| TG | TG 44:2 TG 10:0 16:0 18:2 | 764.6745  | [M+NH4] <sup>+</sup> | 7.589 | 42746<br>24 | 5552469 | 2285090 | 5952326 | 4884596 | 1863861 | 3445228 | 5596812 | 525122  | 766792  | 1665613 | 484261  | 3204354 | 1206034 | 1299756 | 1241796 |
| TG | TG 44:2 TG 10:0 16:1 18:1 | 764.66949 | [M+NH4] <sup>+</sup> | 6.934 | 3669        | 679     | 277     | 1480    | 1908    | 4656    | 3896    | 464     | 898     | 626     | 63203   | 2007    | 4232    | 29759   | 54238   | 1207    |

|    |                           |           |                      |       |              |              |         |              |              |              |              |              |         |              |              |              |              |              |              |         |
|----|---------------------------|-----------|----------------------|-------|--------------|--------------|---------|--------------|--------------|--------------|--------------|--------------|---------|--------------|--------------|--------------|--------------|--------------|--------------|---------|
| TG | TG 44:2 TG 16:0_14:1_14:1 | 769.62836 | [M+Na] <sup>+</sup>  | 7.59  | 29198<br>5   | 352367       | 308021  | 348282       | 364309       | 159068       | 268992       | 418820       | 62172   | 103595       | 177094       | 64613        | 286668       | 146677       | 150419       | 151959  |
| TG | TG 44:3 TG 10:0_16:1_18:2 | 762.65771 | [M+NH4] <sup>+</sup> | 7.273 | 58609<br>3   | 965554       | 356243  | 947618       | 656919       | 214979       | 442438       | 857428       | 74752   | 92223        | 192685       | 75340        | 502354       | 101499       | 141890       | 161879  |
| TG | TG 44:3 TG 8:0_18:1_18:2  | 767.61267 | [M+Na] <sup>+</sup>  | 7.264 | 59873        | 102840       | 68548   | 97383        | 80131        | 24847        | 51490        | 111230       | 3537    | 13197        | 28126        | 9893         | 70148        | 21582        | 23950        | 25255   |
| TG | TG 44:4 TG 8:0_18:2_18:2  | 760.6463  | [M+NH4] <sup>+</sup> | 6.878 | 8017         | 63555        | 8292    | 125827       | 70617        | 0            | 0            | 44009        | 0       | 0            | 0            | 0            | 58027        | 0            | 0            | 0       |
| TG | TG 45:0 TG 13:0_15:0_17:0 | 782.71399 | [M+NH4] <sup>+</sup> | 8.692 | 58608        | 69513        | 699553  | 92828        | 59487        | 146401       | 70921        | 72969        | 88709   | 103178       | 70188        | 80697        | 59465        | 82349        | 84290        | 66608   |
| TG | TG 45:0 TG 14:0_15:0_16:0 | 782.72034 | [M+NH4] <sup>+</sup> | 8.355 | 70652<br>4   | 592823       | 3081    | 589776       | 726444       | 1043852      | 884527       | 720088       | 742684  | 1049059      | 923356       | 1226551      | 450505       | 1075677      | 1118325      | 979581  |
| TG | TG 45:0 TG 15:0_15:0_15:0 | 782.7149  | [M+NH4] <sup>+</sup> | 9.031 | 45322        | 54825        | 12300   | 22551        | 68577        | 21580        | 57547        | 68863        | 26246   | 24960        | 61212        | 25485        | 23196        | 23746        | 52305        | 74562   |
| TG | TG 45:1 TG 14:0_14:0_17:1 | 780.69672 | [M+NH4] <sup>+</sup> | 8.812 | 5454         | 7301         | 44116   | 3921         | 18225        | 8509         | 24862        | 3291         | 19710   | 9641         | 8699         | 9741         | 16523        | 31804        | 38346        | 8433    |
| TG | TG 45:1 TG 14:0_15:0_16:1 | 780.70441 | [M+NH4] <sup>+</sup> | 8.054 | 58591<br>3   | 580755       | 544388  | 552992       | 652636       | 683084       | 636803       | 642178       | 626201  | 598154       | 579497       | 607199       | 400045       | 625212       | 619771       | 556347  |
| TG | TG 45:2 TG 11:0_16:1_18:1 | 778.68652 | [M+NH4] <sup>+</sup> | 7.765 | 32362<br>1   | 350495       | 277384  | 346487       | 285467       | 263692       | 298105       | 380191       | 211443  | 215945       | 261218       | 214934       | 301336       | 240324       | 234997       | 244552  |
| TG | TG 45:2 TG 13:0_16:1_16:1 | 783.64154 | [M+Na] <sup>+</sup>  | 7.763 | 29342        | 26981        | 32415   | 31483        | 35426        | 30054        | 24403        | 38767        | 29247   | 29384        | 30095        | 29829        | 33163        | 26565        | 33178        | 30788   |
| TG | TG 45:3 TG 11:0_18:1_16:2 | 776.67114 | [M+NH4] <sup>+</sup> | 7.427 | 31338        | 48322        | 1450    | 46325        | 39230        | 20613        | 24696        | 48081        | 4962    | 11744        | 18477        | 9251         | 7022         | 16655        | 15901        | 12895   |
| TG | TG 45:3 TG 14:1_14:1_17:1 | 776.67145 | [M+NH4] <sup>+</sup> | 7.538 | 33911        | 30975        | 47577   | 31809        | 45554        | 18020        | 24471        | 38326        | 13254   | 19890        | 24380        | 13760        | 39238        | 24620        | 6164         | 8328    |
| TG | TG 46:0 TG 14:0_14:0_18:0 | 801.68927 | [M+Na] <sup>+</sup>  | 7.959 | 84282        | 99888        | 62147   | 115690       | 66536        | 9959         | 36325        | 61041        | 1247    | 9937         | 31919        | 5313         | 46164        | 33337        | 11644        | 31351   |
| TG | TG 46:0 TG 14:0_16:0_16:0 | 796.73627 | [M+NH4] <sup>+</sup> | 8.486 | 62128<br>66  | 5945794      | 5698410 | 7725410      | 9899977      | 6476900      | 7254222      | 8267996      | 5204896 | 4783751      | 5402924      | 5481098      | 7136621      | 8486062      | 4775761      | 5488769 |
| TG | TG 46:1 TG 14:0_14:0_18:1 | 799.67456 | [M+Na] <sup>+</sup>  | 7.261 | 3003         | 36788        | 2169    | 1721         | 3422         | 4384         | 3103         | 5492         | 2626    | 12856        | 2843         | 3062         | 30828        | 3630         | 13787        | 2613    |
| TG | TG 46:1 TG 14:0_16:0_16:1 | 794.72235 | [M+NH4] <sup>+</sup> | 8.204 | 21726<br>564 | 2050340<br>6 | 105782  | 2723145<br>6 | 2844953<br>4 | 1259671<br>7 | 1961057<br>4 | 2737381<br>2 | 5559012 | 7220444<br>4 | 1108902<br>4 | 5821958<br>9 | 1619749<br>5 | 1036788<br>4 | 1001349<br>4 | 9068324 |
| TG | TG 46:2 TG 14:0_16:1_16:1 | 797.66156 | [M+Na] <sup>+</sup>  | 7.917 | 51785<br>9   | 486326       | 470180  | 556024       | 561372       | 351616       | 487600       | 643874       | 216275  | 278632       | 386700       | 227085       | 476571       | 338778       | 404278       | 342149  |
| TG | TG 46:2 TG 16:0_14:1_16:1 | 792.70667 | [M+NH4] <sup>+</sup> | 7.922 | 14588<br>665 | 1530721<br>1 | 8568308 | 1899947<br>4 | 1593750<br>9 | 5959992      | 1163363<br>8 | 1793864<br>4 | 2489363 | 3461337      | 5973896      | 2339334<br>9 | 1018061<br>9 | 4318652      | 5038884      | 4529476 |
| TG | TG 46:2 TG 16:0_15:1_15:1 | 792.70551 | [M+NH4] <sup>+</sup> | 9.118 | 15705        | 28853        | 12997   | 14072        | 11554        | 38338        | 23108        | 26581        | 14575   | 9970         | 39996        | 27093        | 20073        | 21892        | 10558        | 22839   |
| TG | TG 46:3 TG 14:1_14:1_18:1 | 795.64551 | [M+Na] <sup>+</sup>  | 7.628 | 21874<br>0   | 307795       | 256749  | 278938       | 254205       | 84371        | 188087       | 351908       | 47732   | 68285        | 127354       | 41208        | 229125       | 84415        | 89450        | 91926   |
| TG | TG 46:3 TG 14:1_16:1_16:1 | 790.68958 | [M+NH4] <sup>+</sup> | 7.623 | 25987<br>93  | 3953291      | 1678381 | 3894727      | 2907333      | 716778       | 1907959      | 3789844      | 303777  | 411367       | 861537       | 287622       | 2028468      | 540546       | 530429       | 614736  |
| TG | TG 46:4 TG 10:0_18:1_18:3 | 788.67426 | [M+NH4] <sup>+</sup> | 7.31  | 23127<br>3   | 530988       | 192950  | 494193       | 295631       | 75209        | 177140       | 467009       | 32512   | 38361        | 96830        | 32380        | 309188       | 64884        | 51499        | 74727   |
| TG | TG 46:4 TG 14:1_14:1_18:2 | 793.63037 | [M+Na] <sup>+</sup>  | 7.348 | 29730        | 54978        | 45579   | 52574        | 38926        | 10315        | 18981        | 55774        | 1423    | 8754         | 16447        | 3331         | 39910        | 3413         | 1713         | 15059   |
| TG | TG 47:0 TG 15:0_15:0_17:0 | 815.70331 | [M+Na] <sup>+</sup>  | 8.682 | 30858        | 18433        | 1648    | 31793        | 34543        | 44828        | 51421        | 39538        | 78626   | 66383        | 50319        | 82233        | 6469         | 66036        | 72311        | 62710   |
| TG | TG 47:0 TG 15:0_16:0_16:0 | 810.75189 | [M+NH4] <sup>+</sup> | 8.658 | 91391<br>5   | 815421       | 52190   | 919052       | 1079547      | 1204473      | 1116726      | 1036616      | 1599539 | 1318484      | 1120666      | 1594154      | 1075143      | 1399185      | 1320341      | 1199626 |
| TG | TG 47:1 TG 15:0_15:0_17:1 | 813.69104 | [M+Na] <sup>+</sup>  | 8.41  | 41379        | 2840         | 3774    | 41286        | 46895        | 60281        | 53134        | 47303        | 64336   | 54031        | 54278        | 75954        | 39420        | 52637        | 61418        | 45288   |

|    |                           |           |                      |       |          |          |          |          |          |          |          |          |          |          |          |          |          |          |          |          |
|----|---------------------------|-----------|----------------------|-------|----------|----------|----------|----------|----------|----------|----------|----------|----------|----------|----------|----------|----------|----------|----------|----------|
| TG | TG 47:1 TG 15:0_16:0_16:1 | 808.73572 | [M+NH4] <sup>+</sup> | 8.39  | 1101682  | 988414   | 809652   | 1080392  | 1243024  | 1199387  | 1222205  | 1264092  | 1006172  | 978409   | 1014845  | 1023273  | 959938   | 1042977  | 1061383  | 999826   |
| TG | TG 47:1 TG 15:0_17:0_15:1 | 808.755   | [M+NH4] <sup>+</sup> | 8.085 | 0        | 747      | 832      | 1013     | 1502     | 0        | 0        | 4463     | 4454     | 0        | 0        | 0        | 0        | 0        | 0        | 0        |
| TG | TG 47:2 TG 14:0_16:1_17:1 | 806.71826 | [M+NH4] <sup>+</sup> | 8.1   | 768203   | 835798   | 641447   | 830623   | 955248   | 650275   | 733658   | 923356   | 549199   | 577230   | 630606   | 545363   | 722642   | 604728   | 598928   | 322210   |
| TG | TG 47:2 TG 15:0_16:1_16:1 | 811.67169 | [M+Na] <sup>+</sup>  | 8.118 | 48079    | 12450    | 2677     | 26359    | 33856    | 28196    | 22732    | 45133    | 33541    | 24107    | 26703    | 37468    | 27564    | 37727    | 18489    | 14362    |
| TG | TG 47:3 TG 14:1_16:1_17:1 | 804.70233 | [M+NH4] <sup>+</sup> | 7.816 | 185342   | 259007   | 151856   | 228326   | 159523   | 108244   | 140633   | 162512   | 102979   | 62844    | 62554    | 103940   | 183818   | 56672    | 96715    | 113309   |
| TG | TG 48:0 TG 16:0_16:0_16:0 | 824.76965 | [M+NH4] <sup>+</sup> | 8.771 | 7934322  | 6409070  | 6824676  | 9194855  | 13964936 | 7430062  | 9589894  | 7963126  | 7438686  | 5329888  | 6713880  | 8216963  | 8209052  | 11034608 | 6016668  | 5035220  |
| TG | TG 48:1 TG 14:0_14:0_20:1 | 827.70227 | [M+Na] <sup>+</sup>  | 8.069 | 189802   | 270046   | 430247   | 299122   | 220868   | 69550    | 109671   | 221446   | 40983    | 53478    | 85306    | 31397    | 194127   | 70074    | 49847    | 72818    |
| TG | TG 48:1 TG 14:0_16:0_18:1 | 822.75262 | [M+NH4] <sup>+</sup> | 8.505 | 49620064 | 45724612 | 106280   | 5824632  | 63489868 | 39626624 | 49182944 | 53854228 | 18204574 | 25637516 | 35300464 | 16329451 | 41731184 | 33638120 | 32677634 | 30847460 |
| TG | TG 48:2 TG 14:0_16:1_18:1 | 820.73602 | [M+NH4] <sup>+</sup> | 8.244 | 70336232 | 68138584 | 45194580 | 81959848 | 75951408 | 33510110 | 58108516 | 75493328 | 13747421 | 19094670 | 34376748 | 12621315 | 47977844 | 24280426 | 27944278 | 25104020 |
| TG | TG 48:2 TG 16:0_16:1_16:1 | 825.69318 | [M+Na] <sup>+</sup>  | 8.224 | 973635   | 892462   | 32534    | 1090449  | 1118453  | 740239   | 961908   | 1125132  | 471114   | 561514   | 740928   | 506362   | 858607   | 656153   | 739430   | 655820   |
| TG | TG 48:3 TG 14:0_16:1_18:2 | 818.72125 | [M+NH4] <sup>+</sup> | 7.961 | 18815086 | 23512882 | 13134621 | 25363152 | 19690994 | 5268630  | 12966302 | 21709620 | 2598814  | 3828032  | 7010739  | 2401253  | 13402560 | 4620148  | 4510688  | 5485903  |
| TG | TG 48:3 TG 16:1_16:1_16:1 | 823.67358 | [M+Na] <sup>+</sup>  | 7.959 | 657619   | 674193   | 617819   | 727944   | 725642   | 360769   | 579353   | 756539   | 223466   | 307830   | 435718   | 224268   | 593759   | 359766   | 376860   | 415246   |
| TG | TG 48:4 TG 14:0_14:0_20:4 | 821.65912 | [M+Na] <sup>+</sup>  | 7.681 | 162263   | 276960   | 256065   | 269843   | 214209   | 55446    | 123008   | 273647   | 33869    | 45155    | 87992    | 42019    | 227608   | 79636    | 51986    | 81368    |
| TG | TG 48:4 TG 14:1_16:1_18:2 | 816.70648 | [M+NH4] <sup>+</sup> | 7.68  | 1796849  | 3590330  | 1763857  | 3694850  | 2382521  | 409527   | 1205978  | 2794820  | 235672   | 277091   | 588243   | 193851   | 2088035  | 472172   | 324485   | 493183   |
| TG | TG 48:5 TG 12:0_12:0_24:5 | 819.63983 | [M+Na] <sup>+</sup>  | 7.442 | 7789     | 27109    | 34345    | 34883    | 28679    | 11098    | 8709     | 17033    | 9890     | 12494    | 7428     | 11997    | 3749     | 2085     | 11678    | 17412    |
| TG | TG 48:5 TG 12:0_18:2_18:3 | 814.68115 | [M+NH4] <sup>+</sup> | 7.474 | 69071    | 104797   | 105850   | 107058   | 62037    | 14677    | 52514    | 106044   | 11166    | 40349    | 71829    | 15727    | 64034    | 42714    | 10847    | 73992    |
| TG | TG 48:5 TG 14:1_16:1_18:3 | 814.68726 | [M+NH4] <sup>+</sup> | 7.359 | 109241   | 195871   | 70494    | 244069   | 151602   | 51442    | 87680    | 205347   | 29370    | 23380    | 58657    | 18039    | 164834   | 67107    | 32574    | 62865    |
| TG | TG 48:6 TG 14:0_14:1_20:5 | 812.68927 | [M+NH4] <sup>+</sup> | 6.912 | 3463     | 1666     | 888      | 29195    | 2919     | 9551     | 14459    | 16875    | 25970    | 6973     | 10221    | 15031    | 4670     | 14446    | 9428     | 11330    |
| TG | TG 49:0 TG 15:0_16:0_18:0 | 838.80438 | [M+NH4] <sup>+</sup> | 9.461 | 0        | 0        | 18641    | 7780     | 34830    | 0        | 8052     | 0        | 45153    | 0        | 0        | 40026    | 0        | 0        | 0        | 0        |
| TG | TG 49:0 TG 16:0_16:0_17:0 | 838.78247 | [M+NH4] <sup>+</sup> | 8.922 | 894604   | 996161   | 808270   | 990904   | 1315298  | 933713   | 1020238  | 979606   | 1142016  | 906988   | 958193   | 1095473  | 1021544  | 1217657  | 903937   | 893303   |
| TG | TG 49:1 TG 15:0_16:0_18:1 | 836.76752 | [M+NH4] <sup>+</sup> | 8.673 | 3010465  | 3422033  | 2090618  | 3787065  | 4335392  | 2647066  | 3039865  | 3413660  | 1546299  | 1650640  | 2259368  | 1451515  | 2446939  | 2163187  | 1739879  | 1895659  |
| TG | TG 49:1 TG 16:0_16:0_17:1 | 841.71674 | [M+Na] <sup>+</sup>  | 8.675 | 84843    | 81815    | 63599    | 85888    | 101296   | 92494    | 95649    | 97684    | 70214    | 83003    | 89650    | 75819    | 81174    | 95377    | 84727    | 83124    |
| TG | TG 49:2 TG 15:0_17:1_17:1 | 839.70721 | [M+Na] <sup>+</sup>  | 8.415 | 102268   | 98459    | 73954    | 91519    | 109604   | 91403    | 107368   | 115527   | 65760    | 71401    | 90976    | 65365    | 91354    | 89291    | 89317    | 77032    |
| TG | TG 49:2 TG 16:0_16:1_17:1 | 834.75018 | [M+NH4] <sup>+</sup> | 8.415 | 3171736  | 3679071  | 2006212  | 3596576  | 3805958  | 1925619  | 2833012  | 3561396  | 1096571  | 1262079  | 1886586  | 1047919  | 2522528  | 1608992  | 1407648  | 1550937  |
| TG | TG 49:3 TG 16:1_16:1_17:1 | 832.7334  | [M+NH4] <sup>+</sup> | 8.126 | 739955   | 1134783  | 2087     | 1080712  | 976489   | 383222   | 629823   | 926369   | 259925   | 316243   | 462824   | 246346   | 762336   | 380708   | 246091   | 419147   |
| TG | TG 49:4 TG 16:1_18:1_15:2 | 830.71661 | [M+NH4] <sup>+</sup> | 7.844 | 110520   | 170420   | 108724   | 152545   | 137192   | 38218    | 69537    | 142865   | 30886    | 37394    | 56368    | 22064    | 144134   | 47269    | 65298    | 50156    |
| TG | TG 50:0 TG 16:0_16:0_18:0 | 852.79742 | [M+NH4] <sup>+</sup> | 9.047 | 8837683  | 9947078  | 6875827  | 11991377 | 15723116 | 8249982  | 9516434  | 8679914  | 6451688  | 4150860  | 6788964  | 6161598  | 7633019  | 9902254  | 5178685  | 4444080  |

|    |                              |           |                                   |       |               |               |               |               |               |               |               |               |              |               |               |              |               |               |               |               |
|----|------------------------------|-----------|-----------------------------------|-------|---------------|---------------|---------------|---------------|---------------|---------------|---------------|---------------|--------------|---------------|---------------|--------------|---------------|---------------|---------------|---------------|
| TG | TG 50:1 TG<br>14:0_18:0_18:1 | 855.72552 | [M+Na] <sup>+</sup>               | 8.262 | 14667         | 26738         | 3690          | 14002         | 33452         | 62291         | 4188          | 13600         | 3725         | 49846         | 36199         | 32404        | 10732         | 9298          | 59428         | 5599          |
| TG | TG 50:1 TG<br>16:0_16:0_18:1 | 850.78485 | [M+NH <sub>4</sub> ] <sup>+</sup> | 8.779 | 76819<br>640  | 7010584<br>0  | 5931740<br>8  | 8938683<br>2  | 9887492<br>8  | 6426774<br>4  | 7455362<br>4  | 7482877<br>6  | 3410778<br>4 | 4625633<br>6  | 5618068<br>0  | 3107980<br>6 | 6130708<br>8  | 5746350<br>8  | 5205833<br>6  | 5250453<br>2  |
| TG | TG 50:2 TG<br>14:0_18:1_18:1 | 853.72192 | [M+Na] <sup>+</sup>               | 8.516 | 14234<br>46   | 1225247       | 340282        | 1373521       | 1309222       | 1396395       | 1448886       | 1367564       | 779220       | 959315        | 1294510       | 748706       | 1264474       | 1055922       | 1358814       | 1151624       |
| TG | TG 50:2 TG<br>16:0_16:0_18:2 | 848.75916 | [M+NH <sub>4</sub> ] <sup>+</sup> | 8.969 | 17926<br>6    | 98910         | 144912        | 94788         | 89191         | 91240         | 73289         | 60712         | 124904       | 50232         | 101299        | 41977        | 82628         | 76077         | 60326         | 89362         |
| TG | TG 50:2 TG<br>16:0_16:1_18:1 | 848.76685 | [M+NH <sub>4</sub> ] <sup>+</sup> | 8.538 | 12880<br>9920 | 1295023<br>28 | 9867763<br>2  | 1448885<br>92 | 1470758<br>88 | 9793242<br>4  | 1197252<br>16 | 1288004<br>88 | 4251391<br>2 | 6072050<br>0  | 8500412<br>8  | 3725497<br>2 | 9622274<br>4  | 6614393<br>2  | 7894461<br>6  | 7509024<br>0  |
| TG | TG 50:3 TG<br>16:0_16:0_18:3 | 851.70581 | [M+Na] <sup>+</sup>               | 8.262 | 13032<br>15   | 1240521       | 47294         | 1419547       | 1434870       | 774949        | 1072086       | 1367970       | 519813       | 630055        | 857934        | 533808       | 1008999       | 673906        | 708993        | 831689        |
| TG | TG 50:3 TG<br>16:0_16:1_18:2 | 846.75336 | [M+NH <sub>4</sub> ] <sup>+</sup> | 8.278 | 86834<br>064  | 9628766<br>4  | 6852436<br>0  | 9936884<br>0  | 9248082<br>4  | 3186677<br>8  | 6117055<br>2  | 8387144<br>0  | 1629668<br>7 | 2304285<br>0  | 3897158<br>0  | 1442733<br>6 | 6061578<br>4  | 2530198<br>8  | 2361545<br>2  | 3155743<br>0  |
| TG | TG 50:3 TG<br>16:1_16:1_18:1 | 851.70477 | [M+Na] <sup>+</sup>               | 7.823 | 30169         | 73992         | 1060307       | 111035        | 48200         | 15959         | 17716         | 52384         | 6663         | 9258          | 16509         | 6530         | 51686         | 15806         | 8717          | 11094         |
| TG | TG 50:4 TG<br>16:0_16:0_18:4 | 849.69049 | [M+Na] <sup>+</sup>               | 8.007 | 61056<br>4    | 749568        | 686921        | 751304        | 663781        | 314765        | 481715        | 679170        | 227642       | 310158        | 431882        | 217120       | 656632        | 354391        | 315875        | 422584        |
| TG | TG 50:4 TG<br>16:1_16:1_18:2 | 844.73639 | [M+NH <sub>4</sub> ] <sup>+</sup> | 8.003 | 17722<br>916  | 2921488<br>8  | 11421         | 2945091<br>2  | 1991649<br>0  | 4813951       | 1042914<br>0  | 2047868<br>0  | 2972722      | 4369378       | 7309924       | 2560499      | 1751033<br>8  | 5182096       | 3674438       | 6562660       |
| TG | TG 50:5 TG<br>14:0_18:2_18:3 | 842.72089 | [M+NH <sub>4</sub> ] <sup>+</sup> | 7.711 | 17420<br>96   | 3944438       | 2337394       | 4631592       | 2421777       | 511051        | 1021206       | 2726995       | 334947       | 472879        | 741543        | 319680       | 2392554       | 702238        | 360796        | 848723        |
| TG | TG 50:5 TG<br>16:1_16:1_18:3 | 847.67554 | [M+Na] <sup>+</sup>               | 7.737 | 18070<br>6    | 318251        | 309877        | 301413        | 218772        | 86487         | 140004        | 262327        | 52324        | 86066         | 107955        | 58530        | 262262        | 112672        | 65849         | 135752        |
| TG | TG 50:6 TG<br>14:0_18:3_18:3 | 840.70648 | [M+NH <sub>4</sub> ] <sup>+</sup> | 7.48  | 72418         | 173638        | 122744        | 294046        | 66758         | 13911         | 40865         | 178155        | 13545        | 16316         | 24055         | 10992        | 148976        | 22712         | 13186         | 29656         |
| TG | TG 51:0 TG<br>16:0_17:0_18:0 | 866.81274 | [M+NH <sub>4</sub> ] <sup>+</sup> | 9.177 | 46136<br>2    | 561315        | 396637        | 562650        | 668662        | 426493        | 464959        | 463325        | 464882       | 371231        | 441867        | 400589       | 465388        | 508019        | 380316        | 392368        |
| TG | TG 51:1 TG<br>16:0_17:0_18:1 | 864.79803 | [M+NH <sub>4</sub> ] <sup>+</sup> | 8.937 | 33751<br>80   | 5232403       | 2620268       | 4655514       | 5705662       | 2770794       | 2845188       | 3790653       | 1325660      | 1620173       | 2528121       | 1174508      | 2906356       | 2278580       | 1451363       | 2234145       |
| TG | TG 51:2 TG<br>15:0_18:1_18:1 | 867.73511 | [M+Na] <sup>+</sup>               | 8.688 | 25257<br>6    | 297451        | 204998        | 282466        | 270921        | 224620        | 237099        | 267720        | 120705       | 131427        | 209347        | 112161       | 221617        | 168101        | 172318        | 191090        |
| TG | TG 51:2 TG<br>16:0_16:0_19:2 | 867.72534 | [M+Na] <sup>+</sup>               | 7.229 | 1892          | 1485          | 1218          | 114380        | 0             | 3729          | 952           | 2929          | 1708         | 4169          | 1577          | 3053         | 888           | 2380          | 1804          | 1899          |
| TG | TG 51:2 TG<br>16:0_17:1_18:1 | 862.78357 | [M+NH <sub>4</sub> ] <sup>+</sup> | 8.685 | 10657<br>934  | 1681309<br>0  | 8117816       | 1405794<br>8  | 1410195<br>8  | 7590186       | 8711014       | 1129279<br>7  | 2481240      | 3356373       | 6132578       | 2069611      | 7677303       | 4224289       | 3663336       | 5133904       |
| TG | TG 51:3 TG<br>16:0_17:1_18:2 | 860.76831 | [M+NH <sub>4</sub> ] <sup>+</sup> | 8.436 | 51158<br>94   | 9061875       | 4385826       | 6736501       | 6460430       | 1981062       | 3635168       | 5573241       | 1127331      | 1452158       | 2814876       | 940217       | 5185600       | 1870963       | 1164424       | 2308378       |
| TG | TG 51:3 TG<br>17:1_17:1_17:1 | 865.71918 | [M+Na] <sup>+</sup>               | 8.439 | 16455<br>6    | 219878        | 159332        | 192766        | 185299        | 96750         | 133930        | 174412        | 70277        | 81682         | 141591        | 71329        | 181530        | 102705        | 75320         | 113661        |
| TG | TG 51:4 TG<br>15:0_18:2_18:2 | 858.75189 | [M+NH <sub>4</sub> ] <sup>+</sup> | 8.174 | 73783<br>9    | 1837854       | 939989        | 1393489       | 1094176       | 271702        | 494876        | 929704        | 209858       | 273957        | 482095        | 166506       | 1329728       | 372026        | 168624        | 425708        |
| TG | TG 51:5 TG<br>15:0_18:2_18:3 | 856.7301  | [M+NH <sub>4</sub> ] <sup>+</sup> | 7.908 | 72466         | 267974        | 9306          | 266483        | 180811        | 88057         | 95709         | 184890        | 76215        | 81975         | 127618        | 42624        | 256969        | 108797        | 56192         | 117902        |
| TG | TG 52:0 TG<br>16:0_18:0_18:0 | 880.82892 | [M+NH <sub>4</sub> ] <sup>+</sup> | 9.293 | 39870<br>42   | 6270236       | 3577952       | 5900882       | 7873582       | 4541880       | 3939822       | 4333912       | 3329017      | 2398930       | 3396263       | 3101693      | 4090274       | 4544941       | 2573708       | 2623009       |
| TG | TG 52:1 TG<br>12:0_22:0_18:1 | 883.76788 | [M+Na] <sup>+</sup>               | 9.044 | 80604<br>2    | 958020        | 317288        | 1013861       | 1186064       | 880691        | 814612        | 977714        | 475027       | 679052        | 808899        | 499290       | 797929        | 771067        | 756701        | 806718        |
| TG | TG 52:1 TG<br>16:0_18:0_18:1 | 878.81372 | [M+NH <sub>4</sub> ] <sup>+</sup> | 9.06  | 52710<br>792  | 6952516<br>0  | 4273031<br>2  | 7316428<br>8  | 7901986<br>4  | 5620188<br>4  | 4455540<br>0  | 5528622<br>8  | 1936425<br>8 | 3051896<br>4  | 4029079<br>2  | 1628378<br>1 | 4063796<br>0  | 3764524<br>8  | 3027932<br>6  | 3894401<br>2  |
| TG | TG 52:2 TG<br>16:0_18:1_18:1 | 876.80048 | [M+NH <sub>4</sub> ] <sup>+</sup> | 8.806 | 19355<br>1952 | 2404657<br>60 | 1656917<br>76 | 2306872<br>48 | 2353379<br>36 | 1714736<br>64 | 1686558<br>08 | 1980412<br>64 | 6978783<br>2 | 1011505<br>60 | 1424393<br>60 | 5793244<br>8 | 1554687<br>84 | 1041434<br>96 | 1224656<br>32 | 1371907<br>68 |

|               |        |                           |           |                      |       |               |               |              |               |               |              |               |               |              |              |               |              |               |              |              |              |
|---------------|--------|---------------------------|-----------|----------------------|-------|---------------|---------------|--------------|---------------|---------------|--------------|---------------|---------------|--------------|--------------|---------------|--------------|---------------|--------------|--------------|--------------|
| Prenol lipids | TG     | TG 52:3 TG 16:0_18:1_18:2 | 874.78455 | [M+NH4] <sup>+</sup> | 8.568 | 15565<br>1552 | 2057464<br>16 | 1690569      | 1834359<br>84 | 1804711<br>52 | 8836256<br>0 | 1121214<br>32 | 1573282<br>88 | 5219080<br>4 | 7504644<br>8 | 1062027<br>36 | 4596336<br>4 | 1409522<br>88 | 7974619<br>2 | 6186723<br>6 | 9481317<br>6 |
|               | TG     | TG 52:3 TG 17:1_17:1_18:1 | 879.73846 | [M+Na] <sup>+</sup>  | 8.097 | 24821<br>0    | 566758        | 3219         | 520931        | 293632        | 82448        | 136712        | 298951        | 73051        | 94332        | 159696        | 58889        | 458090        | 107133       | 51134        | 125355       |
|               | TG     | TG 52:4 TG 16:0_18:2_18:2 | 877.72058 | [M+Na] <sup>+</sup>  | 8.325 | 14846<br>55   | 1996536       | 1773773      | 1926305       | 1756150       | 832100       | 1086637       | 1710285       | 723578       | 860621       | 1232800       | 703308       | 1764691       | 1059084      | 725960       | 1119528      |
|               | TG     | TG 52:4 TG 16:1_18:1_18:2 | 872.76898 | [M+NH4] <sup>+</sup> | 8.327 | 85586<br>056  | 1316058<br>56 | 9552839<br>2 | 1184394<br>56 | 9948188<br>8  | 3137763<br>6 | 5298188<br>4  | 8997172<br>0  | 2321156<br>4 | 3199007<br>6 | 5226837<br>2  | 1949456<br>8 | 9515441<br>6  | 3782180<br>0 | 1927168<br>0 | 4401594<br>0 |
|               | TG     | TG 52:4 TG 8:0_22:2_22:2  | 877.72009 | [M+Na] <sup>+</sup>  | 7.702 | 42744         | 124690        | 445          | 144659        | 1200          | 20122        | 519           | 64363         | 8612         | 3307         | 28762         | 2552         | 96519         | 21114        | 4956         | 509          |
|               | TG     | TG 52:5 TG 16:0_16:0_20:5 | 875.70306 | [M+Na] <sup>+</sup>  | 8.062 | 64185<br>0    | 915678        | 814631       | 970186        | 849381        | 395703       | 504510        | 790668        | 303149       | 382996       | 542612        | 280095       | 751471        | 480826       | 340747       | 573207       |
|               | TG     | TG 52:5 TG 16:1_18:2_18:2 | 870.75006 | [M+NH4] <sup>+</sup> | 8.074 | 18708<br>458  | 3937667<br>2  | 2544695<br>8 | 4123073<br>6  | 2620199<br>4  | 7114787      | 1145183<br>3  | 2331430<br>0  | 4949870      | 6371618      | 1096044<br>5  | 3978668      | 2303734<br>6  | 8549844      | 4683278      | 1096014<br>7 |
|               | TG     | TG 52:6 TG 16:0_18:3_18:3 | 873.69    | [M+Na] <sup>+</sup>  | 7.786 | 14487<br>9    | 259734        | 294861       | 329844        | 201744        | 62031        | 75086         | 205888        | 39309        | 50353        | 98596         | 37292        | 249443        | 73969        | 52057        | 133594       |
|               | TG     | TG 52:6 TG 16:1_18:2_18:3 | 868.73737 | [M+NH4] <sup>+</sup> | 7.789 | 16791<br>44   | 4117751       | 2667570      | 5773926       | 2534017       | 611213       | 962852        | 2593274       | 365164       | 453888       | 875306        | 277348       | 2714516       | 667876       | 365220       | 1058100      |
|               | TG     | TG 52:6 TG 18:1_16:2_18:3 | 868.72394 | [M+NH4] <sup>+</sup> | 7.985 | 18465         | 88960         | 20598        | 45204         | 36393         | 28794        | 88025         | 22418         | 10824        | 23927        | 183756        | 20174        | 24003         | 17004        | 19052        | 9067         |
|               | TG     | TG 53:1 TG 17:0_18:0_18:1 | 892.8291  | [M+NH4] <sup>+</sup> | 9.182 | 68701<br>7    | 1280920       | 607528       | 1076494       | 1397653       | 689889       | 519509        | 824542        | 357260       | 463550       | 558203        | 294761       | 693893        | 536989       | 338680       | 603114       |
|               | TG     | TG 53:2 TG 17:0_18:1_18:1 | 890.81494 | [M+NH4] <sup>+</sup> | 8.945 | 52867<br>14   | 1040412<br>3  | 4539936      | 7271512       | 8693996       | 3827976      | 3617131       | 5737331       | 1269626      | 1980621      | 3364820       | 1002883      | 4186968       | 2200361      | 1691556      | 3023224      |
|               | TG     | TG 53:3 TG 17:1_18:1_18:1 | 888.79956 | [M+NH4] <sup>+</sup> | 8.709 | 55051<br>68   | 1104657<br>2  | 5512027      | 7205304       | 7981942       | 2750715      | 3494888       | 5997610       | 1284052      | 1964160      | 3323108       | 993682       | 5137620       | 2069676      | 1179885      | 2895988      |
|               | TG     | TG 53:4 TG 17:0_17:0_19:4 | 891.73639 | [M+Na] <sup>+</sup>  | 8.456 | 75611         | 156314        | 110955       | 120841        | 96922         | 36094        | 55313         | 85987         | 39211        | 52226        | 73511         | 34471        | 140576        | 56682        | 19729        | 72921        |
|               | TG     | TG 53:4 TG 17:1_18:1_18:2 | 886.78333 | [M+NH4] <sup>+</sup> | 8.457 | 20229<br>34   | 5071118       | 2517254      | 3235180       | 2679346       | 592247       | 1153223       | 2127158       | 552537       | 735657       | 1351306       | 425140       | 3198261       | 825631       | 329865       | 1120845      |
|               | TG     | TG 53:5 TG 17:1_18:2_18:2 | 884.76782 | [M+NH4] <sup>+</sup> | 8.195 | 33331<br>9    | 1042290       | 590968       | 718775        | 444762        | 189470       | 218090        | 397357        | 158877       | 189924       | 285583        | 137835       | 772537        | 214770       | 120352       | 289683       |
|               | TG     | TG 53:6 TG 17:1_18:2_18:3 | 882.74591 | [M+NH4] <sup>+</sup> | 7.955 | 48571         | 145062        | 104049       | 168775        | 97528         | 35678        | 50692         | 82246         | 29658        | 31360        | 49460         | 25156        | 127063        | 39749        | 26795        | 59043        |
| Prenol lipids | VAE    | VAE 21:0                  | 617.5387  | [M+Na] <sup>+</sup>  | 5.286 | 2796          | 5777          | 836          | 2523          | 6472          | 9912         | 9153          | 8934          | 8331         | 4649         | 6063          | 12730        | 14902         | 8033         | 12944        | 12284        |
|               | VAE    | VAE 22:4                  | 623.49573 | [M+Na] <sup>+</sup>  | 8.249 | 8148          | 14382         | 4157         | 27848         | 14515         | 13955        | 7866          | 24593         | 7766         | 4574         | 17977         | 2567         | 7057          | 14619        | 1601         | 6981         |
| Others        | Others | NATau 15:0;O              | 364.2088  | [M-H] <sup>-</sup>   | 3.44  | 6502          | 5401          | 4706         | 4616          | 4813          | 4107         | 3552          | 3569          | 4304         | 2584         | 3402          | 5316         | 7204          | 3618         | 2826         | 2471         |
|               | Others | 13-Docosenamide           | 338.34256 | [M+H] <sup>+</sup>   | 2.862 | 13978<br>416  | 1371790<br>6  | 1296102<br>0 | 1255357<br>4  | 2231139<br>6  | 2338957<br>4 | 1350703<br>2  | 2012219<br>8  | 1309134<br>8 | 1547945<br>2 | 2869008<br>8  | 2252128<br>6 | 1974167<br>6  | 1528191<br>6 | 2119058<br>0 | 1879785<br>8 |

**Table S3.** Significantly changed lipid molecules between the low and high intramuscular fat groups (n=8).

| Lipid molecule                 | Ion mode | P-value | FDR    | VIP  |
|--------------------------------|----------|---------|--------|------|
| ASG 28:1;O;Hex;FA 21:0         | Negative | 0.0092  | 0.0417 | 1.64 |
| Cer 12:1;O3/32:5(2OH)          | Negative | 0.0045  | 0.0300 | 1.75 |
| Cer 16:1;O3/38:6(2OH)          | Negative | 0.0003  | 0.0074 | 2.25 |
| Cer 16:2;O3/38:6(2OH)          | Negative | 0.0012  | 0.0161 | 2.28 |
| Cer 18:1;O3/38:6(2OH)          | Negative | 0.0007  | 0.0124 | 1.43 |
| Cer 18:2;O3/38:6(2OH)          | Negative | 0.0005  | 0.0090 | 2.22 |
| Cer 20:1;O3/38:6(2OH)          | Negative | 0.0015  | 0.0173 | 2.00 |
| Cer 20:2;O3/38:6(2OH)          | Negative | 0.0001  | 0.0055 | 1.77 |
| Cer 44:4;O2 Cer 20:1;O2/24:3   | Positive | 0.0094  | 0.0421 | 1.86 |
| Cer 44:4;O2 Cer 28:2;O2/16:2   | Positive | 0.0061  | 0.0354 | 1.51 |
| Cer 45:2;O2 Cer 18:1;O2/27:1   | Positive | 0.0004  | 0.0087 | 1.86 |
| Cer 47:3;O3 Cer 29:3;O2/18:0;O | Positive | 0.0016  | 0.0180 | 1.40 |
| CL 12:0_15:0_18:0_28:0         | Negative | 0.0094  | 0.0421 | 1.33 |
| CL 12:0_28:0_28:0_28:0         | Negative | 0.0011  | 0.0161 | 1.22 |
| CL 16:0_28:0_28:0_28:0         | Negative | 0.0003  | 0.0072 | 1.59 |
| CL 28:0_16:2_28:0_28:0         | Negative | 0.0069  | 0.0367 | 1.32 |
| DG 30:1                        | Positive | 0.0004  | 0.0082 | 1.42 |
| DG 32:1 DG 16:0_16:1           | Positive | 0.0006  | 0.0103 | 1.09 |
| DG 33:0                        | Positive | 0.0023  | 0.0224 | 2.15 |
| DG 40:4                        | Positive | 0.0124  | 0.0460 | 1.59 |
| DG 45:10                       | Positive | 0.0109  | 0.0441 | 1.55 |
| DG 49:10                       | Positive | 0.0075  | 0.0381 | 2.62 |
| DG 52:6                        | Positive | 0.0057  | 0.0337 | 1.26 |
| FA 16:1                        | Negative | 0.0008  | 0.0136 | 1.41 |
| LPG O-24:6                     | Negative | 0.0001  | 0.0055 | 1.75 |
| NAGly 28:2;O(FA 28:6)          | Negative | 0.0006  | 0.0110 | 2.46 |
| NAGlySer 20:0;O(FA 28:1)       | Negative | 0.0000  | 0.0021 | 1.38 |
| PC 15:4_24:6                   | Negative | 0.0002  | 0.0062 | 1.50 |
| PC 17:0_18:1;O4                | Negative | 0.0109  | 0.0441 | 2.19 |
| PC 30:0                        | Positive | 0.0037  | 0.0267 | 1.06 |
| PC 31:0                        | Positive | 0.0039  | 0.0277 | 1.00 |
| PC 32:2 PC 16:1_16:1           | Positive | 0.0003  | 0.0068 | 1.25 |
| PC 33:1                        | Positive | 0.0036  | 0.0267 | 1.32 |
| PC 33:2 PC 15:0_18:2           | Positive | 0.0001  | 0.0055 | 1.53 |
| PC 34:4                        | Positive | 0.0035  | 0.0267 | 1.06 |
| PC 35:1                        | Positive | 0.0064  | 0.0356 | 1.59 |
| PC 35:2 PC 17:0_18:2           | Positive | 0.0000  | 0.0016 | 1.29 |
| PC 35:3                        | Positive | 0.0033  | 0.0260 | 1.15 |
| PC 36:3 PC 18:1_18:2           | Positive | 0.0009  | 0.0141 | 1.08 |
| PC 36:5 PC 18:2_18:3           | Positive | 0.0037  | 0.0267 | 1.88 |
| PC 37:2 PC 19:0_18:2           | Positive | 0.0031  | 0.0255 | 1.02 |
| PC 38:2                        | Positive | 0.0095  | 0.0421 | 1.02 |
| PC 40:6                        | Positive | 0.0077  | 0.0388 | 1.82 |
| PC O-32:1 PC O-16:1_16:0       | Positive | 0.0046  | 0.0305 | 1.02 |
| PC O-32:3                      | Positive | 0.0004  | 0.0087 | 1.29 |

|                                 |          |        |        |      |
|---------------------------------|----------|--------|--------|------|
| PC O-34:4 PC O-18:4_16:0        | Positive | 0.0107 | 0.0441 | 2.09 |
| PC O-37:6 PC O-18:4_19:2        | Positive | 0.0118 | 0.0452 | 2.31 |
| PC O-37:8 PC O-15:2_22:6        | Positive | 0.0000 | 0.0016 | 1.27 |
| PC O-39:3                       | Positive | 0.0028 | 0.0239 | 1.21 |
| PE 34:1                         | Positive | 0.0111 | 0.0441 | 3.08 |
| PE 36:4 PE 18:2_18:2            | Positive | 0.0025 | 0.0226 | 1.22 |
| PE 38:5 PE 18:0_20:5            | Negative | 0.0089 | 0.0410 | 1.06 |
| PE 42:0_6:0                     | Negative | 0.0001 | 0.0061 | 2.30 |
| PE 6:0_42:1                     | Negative | 0.0005 | 0.0093 | 2.09 |
| PE O-16:0_28:0;O1               | Negative | 0.0000 | 0.0006 | 4.11 |
| PE O-18:0_28:0;O1               | Negative | 0.0001 | 0.0055 | 1.74 |
| PE O-35:5 PE O-15:1_20:4        | Negative | 0.0014 | 0.0170 | 1.11 |
| PE O-37:6 PE O-17:2_20:4        | Negative | 0.0010 | 0.0148 | 1.15 |
| PE P-38:4 PE P-18:0_20:4        | Positive | 0.0019 | 0.0196 | 1.09 |
| PG O-15:0_28:3                  | Negative | 0.0013 | 0.0164 | 4.15 |
| PG O-15:0_28:7                  | Negative | 0.0026 | 0.0226 | 1.10 |
| PS 36:0 PS 18:0_18:0            | Negative | 0.0083 | 0.0402 | 1.45 |
| PS 36:1 PS 18:0_18:1            | Negative | 0.0004 | 0.0088 | 1.17 |
| PS 40:5                         | Negative | 0.0002 | 0.0062 | 1.37 |
| PS O-8:0_16:2                   | Negative | 0.0100 | 0.0425 | 2.83 |
| SM 12:1;O2/35:0                 | Negative | 0.0000 | 0.0021 | 1.46 |
| SM 33:1;O2                      | Positive | 0.0121 | 0.0454 | 1.11 |
| SM 34:0;O2                      | Positive | 0.0121 | 0.0454 | 1.04 |
| SM 40:1;O2                      | Positive | 0.0131 | 0.0476 | 1.89 |
| SM 42:2;O2 SM 18:1;O2/24:1      | Positive | 0.0110 | 0.0441 | 1.11 |
| SM 42:3;O2                      | Positive | 0.0097 | 0.0422 | 1.99 |
| SM 45:0;O3                      | Negative | 0.0036 | 0.0267 | 3.36 |
| SM 45:1;O3                      | Negative | 0.0109 | 0.0441 | 1.14 |
| TG 40:1 TG 8:0_14:0_18:1        | Positive | 0.0009 | 0.0136 | 1.07 |
| TG 40:2 TG 8:0_16:1_16:1        | Positive | 0.0011 | 0.0161 | 2.01 |
| TG 42:1 TG 10:0_16:0_16:1       | Positive | 0.0001 | 0.0055 | 1.46 |
| TG 42:2 TG 10:0_16:1_16:1       | Positive | 0.0037 | 0.0267 | 1.59 |
| TG 42:2 TG 8:0_16:1_18:1        | Positive | 0.0002 | 0.0061 | 1.83 |
| TG 42:3 TG 8:0_10:0_24:3        | Positive | 0.0033 | 0.0260 | 1.45 |
| TG 44:2 TG 10:0_16:0_18:2       | Positive | 0.0001 | 0.0055 | 1.60 |
| TG 44:3 TG 10:0_16:1_18:2       | Positive | 0.0001 | 0.0055 | 1.82 |
| TG 44:3 TG 8:0_18:1_18:2        | Positive | 0.0034 | 0.0267 | 1.66 |
| TG 46:2;O3 TG 14:0_14:0_18:2;O3 | Positive | 0.0086 | 0.0410 | 3.01 |
| TG 46:2 TG 16:0_14:1_16:1       | Positive | 0.0001 | 0.0055 | 1.28 |
| TG 46:3 TG 14:1_14:1_18:1       | Positive | 0.0025 | 0.0226 | 1.11 |
| TG 46:3 TG 14:1_16:1_16:1       | Positive | 0.0002 | 0.0062 | 1.83 |
| TG 46:4 TG 10:0_18:1_18:3       | Positive | 0.0012 | 0.0161 | 1.78 |
| TG 46:4 TG 14:1_14:1_18:2       | Positive | 0.0051 | 0.0318 | 2.24 |
| TG 48:1 TG 14:0_14:0_20:1       | Positive | 0.0037 | 0.0267 | 1.36 |
| TG 48:2 TG 14:0_16:1_18:1       | Positive | 0.0001 | 0.0055 | 1.08 |
| TG 48:3 TG 14:0_16:1_18:2       | Positive | 0.0003 | 0.0069 | 1.49 |
| TG 48:4 TG 14:0_14:0_20:4       | Positive | 0.0086 | 0.0410 | 1.14 |

|                               |          |        |        |      |
|-------------------------------|----------|--------|--------|------|
| TG 48:4 TG 14:1_16:1_18:2     | Positive | 0.0013 | 0.0164 | 1.88 |
| TG 48:5 TG 14:1_16:1_18:3     | Positive | 0.0088 | 0.0410 | 1.16 |
| TG 50:2;O TG 16:0_18:1_16:1;O | Positive | 0.0078 | 0.0390 | 1.82 |
| TG 50:3 TG 16:0_16:1_18:2     | Positive | 0.0002 | 0.0062 | 1.18 |
| TG 50:5 TG 14:0_18:2_18:3     | Positive | 0.0066 | 0.0360 | 1.45 |
| TG 51:2 TG 16:0_17:1_18:1     | Positive | 0.0000 | 0.0021 | 1.17 |
| TG 51:3 TG 16:0_17:1_18:2     | Positive | 0.0016 | 0.0184 | 1.16 |
| TG 52:4;O TG 17:0_18:2_17:2;O | Positive | 0.0137 | 0.0494 | 2.09 |
| TG 52:5 TG 16:1_18:2_18:2     | Positive | 0.0088 | 0.0410 | 1.13 |
| TG 52:6 TG 16:1_18:2_18:3     | Positive | 0.0099 | 0.0422 | 1.46 |
| TG 53:2 TG 17:0_18:1_18:1     | Positive | 0.0003 | 0.0069 | 1.16 |
| TG 53:3 TG 17:1_18:1_18:1     | Positive | 0.0015 | 0.0174 | 1.19 |
| VAE 21:0                      | Positive | 0.0073 | 0.0380 | 1.62 |

Abbreviations: FDR, false discovery rate; VIP, variable importance in projection.



**Table S4.** Significantly changed and FC>2/FC<0.5 lipid molecules between the low and high intramuscular fat groups (n=8).

| Metabolite name              | FC (H/L) | log2(FC) | FDR    | VIP  |
|------------------------------|----------|----------|--------|------|
| PE O-16:0_28:0;O1            | 12.06    | 3.59     | 0.0006 | 1.46 |
| Cer 18:2;O3/38:6(2OH)        | 4.07     | 2.02     | 0.0090 | 1.06 |
| Cer 16:1;O3/38:6(2OH)        | 3.99     | 2.00     | 0.0074 | 1.02 |
| PE 42:0_6:0                  | 3.86     | 1.95     | 0.0061 | 1.46 |
| PE 6:0_42:1                  | 3.41     | 1.77     | 0.0093 | 1.46 |
| Cer 20:2;O3/38:6(2OH)        | 3.15     | 1.65     | 0.0055 | 1.06 |
| PE O-18:0_28:0;O1            | 3.04     | 1.61     | 0.0055 | 1.49 |
| TG 46:3 TG 14:1_16:1_16:1    | 3.01     | 1.59     | 0.0062 | 2.01 |
| TG 44:3 TG 10:0_16:1_18:2    | 2.93     | 1.55     | 0.0055 | 1.88 |
| TG 42:2 TG 8:0_16:1_18:1     | 2.85     | 1.51     | 0.0061 | 1.83 |
| LPG O-24:6                   | 2.73     | 1.45     | 0.0055 | 1.16 |
| CL 16:0_28:0_28:0_28:0       | 2.60     | 1.38     | 0.0072 | 1.11 |
| TG 44:2 TG 10:0_16:0_18:2    | 2.53     | 1.34     | 0.0055 | 1.86 |
| TG 48:3 TG 14:0_16:1_18:2    | 2.48     | 1.31     | 0.0069 | 2.19 |
| SM 12:1;O2/35:0              | 2.41     | 1.27     | 0.0021 | 1.62 |
| DG 30:1                      | 2.40     | 1.26     | 0.0082 | 1.11 |
| TG 42:1 TG 10:0_16:0_16:1    | 2.34     | 1.22     | 0.0055 | 1.82 |
| NAGlySer 20:0;O(FA 28:1)     | 2.28     | 1.19     | 0.0021 | 1.17 |
| TG 46:2 TG 16:0_14:1_16:1    | 2.17     | 1.12     | 0.0055 | 1.99 |
| TG 50:3 TG 16:0_16:1_18:2    | 2.06     | 1.04     | 0.0062 | 2.30 |
| TG 51:2 TG 16:0_17:1_18:1    | 2.01     | 1.01     | 0.0021 | 2.46 |
| PC 32:2 PC 16:1_16:1         | 0.48     | -1.06    | 0.0068 | 1.22 |
| PC O-37:8 PC O-15:2_22:6     | 0.46     | -1.11    | 0.0016 | 1.42 |
| PC 35:2 PC 17:0_18:2         | 0.45     | -1.14    | 0.0016 | 1.28 |
| PC O-32:3                    | 0.44     | -1.19    | 0.0087 | 1.38 |
| PS 40:5                      | 0.43     | -1.23    | 0.0062 | 1.59 |
| PC 15:4_24:6                 | 0.41     | -1.29    | 0.0062 | 1.17 |
| PC 33:2 PC 15:0_18:2         | 0.41     | -1.30    | 0.0055 | 1.25 |
| Cer 45:2;O2 Cer 18:1;O2/27:1 | 0.37     | -1.43    | 0.0087 | 1.08 |

Abbreviations: H, high intramuscular fat group; L, low intramuscular fat group.

**Table S5.** Aroma compounds identified in donkey meats (n=8).

| Compound class                       | LRI                        |                         | <sup>3</sup> Concentration (µg/kg) |                         | VIP  |
|--------------------------------------|----------------------------|-------------------------|------------------------------------|-------------------------|------|
|                                      | <sup>1</sup> Calculated RI | <sup>2</sup> Library RI | HIMF                               | LIMF                    |      |
| <i>Aldehydes</i>                     |                            |                         |                                    |                         |      |
| (E)-2-Undecenal                      | 1750                       | 1766                    | 3.01±0.37                          | 3.22±0.39               | 0.03 |
| 2,4-Decadienal, (E,E)-               | 1763                       | 1812                    | 4.55±0.76 <sup>b</sup>             | 8.26±0.63 <sup>a</sup>  | 0.75 |
| 2,4-Heptadienal, (E,E)-              | 1459                       | 1463                    | 0.44±0.07                          | 0.57±0.05               | 0.12 |
| 2-Butenal, 3-methyl-                 | 1197                       | 1215                    | 2.19±0.22                          | 2.42±0.14               | 0.02 |
| 2-Decenal, (E)-                      | 1642                       | 1659                    | 3.84±0.44                          | 3.88±0.44               | 0.1  |
| 2-Heptenal, (E)-                     | 1323                       | 1326                    | 60.26±9.73                         | 56.76±4.75              | 0.32 |
| 2-Hexenal, (E)-                      | 1217                       | 1230                    | 0.53±0.05 <sup>a</sup>             | 0.33±0.02 <sup>b</sup>  | 0.32 |
| 2-Nonenal, (E)-                      | 1534                       | 1536                    | 3.33±0.49                          | 3.65±0.37               | 0.03 |
| 2-Octenal, (E)-                      | 1428                       | 1430                    | 41.34±6.92                         | 42.68±4.17              | 0.06 |
| 2-Octenal, 2-butyl-                  | 1666                       | 1682                    | 2.24±0.75 <sup>b</sup>             | 18.19±3.36 <sup>a</sup> | 3.05 |
| 2-Pentenal, (E)-                     | 1127                       | 1127                    | 3.76±0.41 <sup>a</sup>             | 2.45±0.43 <sup>b</sup>  | 0.81 |
| 5-Ethyl-2-furaldehyde                | 1637                       | 1645                    | 0.27±0.05                          | 0.34±0.04               | 0.09 |
| Benzaldehyde                         | 1526                       | 1531                    | 397.68±48.22                       | 527.61±61.23            | 0.96 |
| Benzaldehyde, 2-hydroxy-             | 1683                       | 1672                    | 3.32±0.30                          | 3.45±0.20               | 0.06 |
| Benzaldehyde, 2-methyl-              | 1622                       | 1632                    | 0.32±0.03                          | 0.33±0.01               | 0.02 |
| Benzaldehyde, 3,5-dimethyl-          | 1818                       | 1837                    | 0.14±0.01                          | 0.12±0.01               | 0.1  |
| Benzaldehyde, 4-ethyl-               | 1711                       | 1745                    | 10.5±1.66 <sup>b</sup>             | 15.63±1.60 <sup>a</sup> | 0.61 |
| Benzaldehyde, 4-pentyl-              | 2008                       | 2003                    | 1.64±0.33 <sup>b</sup>             | 4.23±0.48 <sup>a</sup>  | 0.96 |
| Benzeneacetaldehyde                  | 1645                       | 1651                    | 0.84±0.07 <sup>a</sup>             | 0.63±0.06 <sup>b</sup>  | 0.27 |
| Butanal                              | 860                        | 883                     | 2.85±0.29                          | 2.33±0.14               | 0.29 |
| Decanal                              | 1496                       | 1500                    | 4.53±0.41 <sup>b</sup>             | 5.93±0.18 <sup>a</sup>  | 0.23 |
| Dodecanal                            | 1707                       | 1710                    | 3.34±0.50 <sup>b</sup>             | 7.8±0.81 <sup>a</sup>   | 1.01 |
| E-Citral                             | 1729                       | 1744                    | 0.4±0.07 <sup>b</sup>              | 1.12±0.10 <sup>a</sup>  | 0.65 |
| Furfural                             | 1463                       | 1465                    | 1.17±0.11                          | 0.99±0.07               | 0.2  |
| Heptanal                             | 1182                       | 1185                    | 111.73±17.50                       | 116.4±10.28             | 0.51 |
| Hexadecanal                          | 2130                       | 2149                    | 1.15±0.08                          | 1.59±0.28               | 0.14 |
| Hexanal                              | 1083                       | 1086                    | 2344.96±274.77                     | 2235.94±134.23          | 1.12 |
| Nonanal                              | 1392                       | 1396                    | 366.76±36.15                       | 447.64±21.26            | 0.66 |
| Octanal                              | 1287                       | 1289                    | 112.17±6.44 <sup>a</sup>           | 89.13±9.67 <sup>b</sup> | 1.24 |
| Pentanal                             | 1008                       | 969                     | 431.81±30.76 <sup>a</sup>          | 338.9±18.5 <sup>b</sup> | 1.82 |
| Trans,trans-Nona-2,4-dienal          | 1700                       | 1713                    | 0.99±0.19                          | 1.32±0.17               | 0.18 |
| Undecanal                            | 1601                       | 1616                    | 5.82±1.10 <sup>b</sup>             | 8.68±0.49 <sup>a</sup>  | 0.54 |
| 3-Cyclohexene-1-carboxaldehyde       | 1459                       | 1490                    | 3.56±1.13                          | 3.18±0.84               | 0.15 |
| 5-Ethylcyclopent-1-enecarboxaldehyde | 1418                       | 1410                    | 31.79±4.32                         | 27.18±2.09              | 0.52 |
| <i>Ketones</i>                       |                            |                         |                                    |                         |      |
| 1-Octen-3-one                        | 1298                       | 1310                    | 3.65±0.30 <sup>a</sup>             | 2.33±0.15 <sup>b</sup>  | 0.58 |
| 1-Propanone, 1-(1-cyclohexen-1-yl)-  | 1590                       | 1620                    | 1.26±0.21 <sup>b</sup>             | 3.45±0.34 <sup>a</sup>  | 0.92 |
| 2(3H)-Furanone, 5-butyldihydro-      | 1920                       | 1938                    | 0.03±0.01                          | 0.03±0.01               | 0.07 |
| 2(3H)-Furanone, 5-ethyldihydro-      | 1706                       | 1723                    | 0.032±0.00 <sup>a</sup>            | 0.025±0.00 <sup>b</sup> | 0.08 |
| 2(3H)-Furanone, dihydro-5-pentyl-    | 2033                       | 2051                    | 0.06±0.01                          | 0.05±0.00               | 0.07 |
| 2(3H)-Furanone, dihydro-5-propyl-    | 1808                       | 1817                    | 0.02±0.00                          | 0.02±0.00               | 0.09 |
| 2,3-Octanedione                      | 1320                       | 1323                    | 724.27±160.99                      | 980.71±61.07            | 2.4  |
| 2,3-Pentanedione                     | 1063                       | 1065                    | 2.45±0.79                          | 4.00±0.45               | 1.06 |

|                                                              |      |      |                           |                          |      |
|--------------------------------------------------------------|------|------|---------------------------|--------------------------|------|
| 2,5-Hexanedione                                              | 1502 | 1500 | 0.14±0.09                 | 0.03±0.00                | 0.32 |
| 2-Butanone                                                   | 889  | 908  | 5.11±2.29 <sup>a</sup>    | 0.18±0.03 <sup>b</sup>   | 1.96 |
| 2-Heptanone                                                  | 1178 | 1181 | 21.18±1.91                | 22.77±1.4                | 0.02 |
| 2-Heptanone, 4,6-dimethyl-                                   | 1257 | 1262 | 16.26±1.26 <sup>b</sup>   | 18.14±0.74 <sup>a</sup>  | 0.85 |
| 2-Heptanone, 6-methyl-                                       | 1234 | 1245 | 0.51±0.15                 | 1.10±0.14                | 0.04 |
| 2-Nonanone                                                   | 1386 | 1397 | 0.73±0.05                 | 0.66±0.10                | 0.58 |
| 2-Octanone                                                   | 1282 | 1293 | 1.48±0.25 <sup>b</sup>    | 2.2±0.11 <sup>a</sup>    | 0.33 |
| 2-Pyrrolidinone                                              | 2036 | 2043 | 0.48±0.14                 | 0.28±0.04                | 0.27 |
| 2-Pyrrolidinone, 1-methyl-                                   | 1672 | 1665 | 0.06±0.02 <sup>a</sup>    | 0.02±0.00 <sup>b</sup>   | 0.27 |
| 3(2H)-Furanone, 4-hydroxy-5-methyl-                          | 2112 | 2120 | 0.27±0.26                 | 0.005±0.00               | 0.42 |
| 3,5-Octadien-2-one                                           | 1516 | 1522 | 6.15±1.28 <sup>b</sup>    | 9.56±0.78 <sup>a</sup>   | 0.68 |
| 3-Octanone                                                   | 1251 | 1264 | 3.51±0.56                 | 4.77±0.75                | 0.01 |
| 3-Octen-2-one                                                | 1405 | 1407 | 8.04±2.77                 | 11.41±1.89               | 0.66 |
| 5,9-Undecadien-2-one, 6,10-dimethyl-, (Z)-                   | 1849 | 1863 | 2.39±0.21 <sup>b</sup>    | 4.88±0.30 <sup>a</sup>   | 0.04 |
| 6-Methyl-5-hepten-2-one                                      | 1334 | 1335 | 12.85±12.31               | 13.91±13.00              | 0.25 |
| 6-Undecanone                                                 | 1524 | 1528 | 0.14±0.03 <sup>b</sup>    | 0.6±0.06 <sup>a</sup>    | 0.73 |
| Acetoin                                                      | 1283 | 1298 | 0.49±0.29                 | 0.47±0.14                | 0.27 |
| Cyclohexanone                                                | 1293 | 1291 | 0.25±0.02                 | 0.3±0.08                 | 0.01 |
| Ethanone, 1,1'-(1,3-phenylene)bis-                           | 2338 | 2333 | 0.03±0.01                 | 0.03±0.01                | 0.04 |
| Isophorone                                                   | 1595 | 1591 | 0.13±0.05                 | 0.05±0.01                | 0.3  |
| 2,6-Di-tert-butyl-4-hydroxy-4-methylcyclohexa-2,5-dien-1-one | 2086 | 2116 | 15±6.40                   | 9.32±1.97                | 0.46 |
| <b>Alcohols</b>                                              |      |      |                           |                          |      |
| 1-Pentanol                                                   | 1240 | 1253 | 219.82±22.28 <sup>a</sup> | 157.22±8.62 <sup>b</sup> | 1.73 |
| 1-Octen-3-ol                                                 | 1439 | 1451 | 137.01±20.37              | 150.08±6.28              | 0.21 |
| (S)-(+)-3-Methyl-1-pentanol                                  | 1535 | 1557 | 9.36±2.45                 | 7.6±0.52                 | 0.21 |
| 1-Hexanol                                                    | 1343 | 1355 | 9.00±1.20                 | 8.63±0.37                | 0.15 |
| 1-Decanol                                                    | 1763 | 1760 | 0.98±0.21 <sup>b</sup>    | 2.01±0.20 <sup>a</sup>   | 0.6  |
| 1-Dodecanol                                                  | 1955 | 1969 | 0.98±0.18                 | 1.34±0.23                | 0.16 |
| Benzenemethanol                                              | 1872 | 1890 | 0.8±0.07                  | 0.66±0.09                | 0.21 |
| Ethanol, 2-phenoxy-                                          | 2140 | 2121 | 0.14±0.03                 | 0.12±0.02                | 0.1  |
| 5-Octen-1-ol, (Z)-                                           | 1604 | 1615 | 1.34±0.27                 | 1.86±0.11                | 0.28 |
| 1,6-Heptadien-4-ol                                           | 1312 | 1330 | 1.96±0.31 <sup>a</sup>    | 1.00±0.05 <sup>b</sup>   | 0.62 |
| Nerol                                                        | 1834 | 1850 | 0.31±0.03 <sup>b</sup>    | 0.41±0.03 <sup>a</sup>   | 0.1  |
| <b>Acids</b>                                                 |      |      |                           |                          |      |
| Hexanoic acid                                                | 1841 | 1864 | 18.97±1.72                | 22.97±1.83               | 0.2  |
| Acetic acid                                                  | 1456 | 1449 | 3.60±1.22                 | 1.89±0.53                | 0.72 |
| Decanoic acid                                                | 2265 | 2289 | 2.91±0.28 <sup>a</sup>    | 1.8±0.12 <sup>b</sup>    | 0.57 |
| Octanoic acid                                                | 2053 | 2065 | 2.03±0.15 <sup>a</sup>    | 1.45±0.10 <sup>b</sup>   | 0.4  |
| Heptanoic acid                                               | 1947 | 1970 | 1.45±0.17                 | 1.08±0.07                | 0.32 |
| Pentanoic acid                                               | 1735 | 1733 | 0.76±0.04 <sup>a</sup>    | 0.64±0.03 <sup>b</sup>   | 0.18 |
| Butanoic acid                                                | 1627 | 1649 | 0.56±0.15                 | 0.29±0.04 <sup>b</sup>   | 0.37 |
| Hexanoic acid, 2-ethyl-                                      | 1942 | 1964 | 0.20±0.03 <sup>a</sup>    | 0.25±0.07 <sup>b</sup>   | 0    |
| Dodecanoic acid                                              | 2476 | 2497 | 0.18±0.04 <sup>a</sup>    | 0.09±0.01 <sup>b</sup>   | 0.29 |
| <b>Esters</b>                                                |      |      |                           |                          |      |
| Formic acid, octyl ester                                     | 1444 | 1428 | 29.03±2.97 <sup>a</sup>   | 20.13±1.12 <sup>b</sup>  | 0.94 |

|                                                         |      |      |                          |                           |      |
|---------------------------------------------------------|------|------|--------------------------|---------------------------|------|
| 1,2-Benzenedicarboxylic acid, bis(2-methylpropyl) ester | 2536 | 2536 | 15.12±2.4                | 13.51±1.74                | 0.37 |
| n-Caproic acid vinyl ester                              | 1222 | 1233 | 0.76±0.21                | 1.19±0.97                 | 0.34 |
| Decanoic acid, ethyl ester                              | 1633 | 1644 | 0.21±0.08                | 0.12±0.03                 | 0.24 |
| Hexadecanoic acid, methyl ester                         | 2210 | 2208 | 0.14±0.01                | 0.2±0.03                  | 0.08 |
| Nonanoic acid, ethyl ester                              | 1531 | 1531 | 0.37±0.33                | 0.1±0.08                  | 0.38 |
| Pentanoic acid, pentyl ester                            | 1410 | 1401 | 0.06±0.01 <sup>b</sup>   | 0.2±0.02 <sup>a</sup>     | 0.42 |
| Acetic acid, cyclohexyl ester                           | 1352 | 1361 | 0.07±0.02 <sup>b</sup>   | 0.2±0.01 <sup>a</sup>     | 0.54 |
| Benzoic acid, 2-hydroxy-, methyl ester                  | 1781 | 1796 | 0.15±0.01                | 0.13±0.01                 | 0.08 |
| Octanoic acid, ethyl ester                              | 1431 | 1440 | 0.19±0.15                | 0.08±0.05                 | 0.23 |
| Nonanoic acid, methyl ester                             | 1488 | 1491 | 0.14±0.07                | 0.18±0.12                 | 0.01 |
| Propanoic acid, 2-methyl-, butyl ester                  | 1151 | 1148 | 0.27±0.12                | 0.04±0.02                 | 0.72 |
| Decanoic acid, methyl ester                             | 1590 | 1593 | 0.07±0.03                | 0.06±0.02                 | 0.08 |
| Hexanedioic acid, bis(2-methylpropyl) ester             | 2119 | 2126 | 0.04±0.01                | 0.03±0.00                 | 0.06 |
| Butanoic acid, butyl ester                              | 1214 | 1220 | 0.09±0.03 <sup>a</sup>   | 0.02±0.01 <sup>b</sup>    | 0.52 |
| Dodecanoic acid, ethyl ester                            | 1837 | 1841 | 0.02±0.01                | 0.02±0.01                 | 0.07 |
| Trans-Methyl Dihydrojasmonate                           | 2281 | 2264 | 0.05±0.02                | 0.05±0.01                 | 0.01 |
| 1-Methoxy-2-propyl acetate                              | 1217 | 1233 | 0.12±0.06                | 0.08±0.05                 | 0.3  |
| Triacetin                                               | 2059 | 2077 | 0.11±0.03                | 0.04±0.00                 | 0.29 |
| Diethyl Phthalate                                       | 2369 | 2366 | 0.16±0.05                | 0.13±0.02                 | 0.1  |
| Anisyl propionate                                       | 2168 | 2190 | 0.18±0.04                | 0.2±0.03                  | 0.02 |
| Tributyl phosphate                                      | 2108 | 2114 | 0.23±0.05                | 0.22±0.10                 | 0.15 |
| Dimethyl phthalate                                      | 2299 | 2303 | 0.6±0.17                 | 0.51±0.07                 | 0.11 |
| Hexanoic acid, thio-, S-butyl ester                     | 1578 | 1608 | 1.45±0.33 <sup>b</sup>   | 3.64±0.34 <sup>a</sup>    | 0.91 |
| Hexanethioic acid, S-methyl ester                       | 1402 | 1412 | 0.34±0.06 <sup>b</sup>   | 0.52±0.05 <sup>a</sup>    | 0.34 |
| <b>Furans</b>                                           |      |      |                          |                           |      |
| Furan, 3-methyl-                                        | 854  | 853  | 0.03±0.02 <sup>b</sup>   | 0.07±0.01 <sup>a</sup>    | 0.47 |
| Furan, 2-ethyl-                                         | 978  | 960  | 5.83±0.70                | 6.17±0.45                 | 0.02 |
| Furan, 2-pentyl-                                        | 1230 | 1232 | 118.4±28.79 <sup>b</sup> | 287.83±51.79 <sup>a</sup> | 3.46 |
| trans-Linalool oxide (furanoid)                         | 1466 | 1452 | 1.95±0.40 <sup>b</sup>   | 4.52±0.31 <sup>a</sup>    | 0.92 |
| 1-Propanone, 1-(5-methyl-2-furanyl)-                    | 1712 | 1670 | 0.25±0.05 <sup>b</sup>   | 0.38±0.03 <sup>a</sup>    | 0.19 |
| 1-Pentanone, 1-(2-furanyl)-                             | 1760 | 1747 | 0.17±0.04 <sup>b</sup>   | 0.49±0.05 <sup>a</sup>    | 0.53 |
| 2-Butylfuran                                            | 1128 | 1142 | 4.81±2.97                | 0.15±0.01                 | 1.43 |
| Furan, 2-hexyl-                                         | 1330 | 1321 | 0.12±0.03                | 0.24±0.18                 | 0.08 |
| <b>Sulfur-containing compounds</b>                      |      |      |                          |                           |      |
| Dimethyl sulfone                                        | 1902 | 1913 | 2.65±0.61 <sup>a</sup>   | 1.08±0.17 <sup>b</sup>    | 0.85 |
| Thiophene, 2-pentyl-                                    | 1460 | 1473 | 3.59±0.71 <sup>b</sup>   | 11.06±1.13 <sup>a</sup>   | 1.54 |
| 5-Methyl-2-thiophenecarboxaldehyde                      | 1732 | 1767 | 3.88±0.56                | 2.63±0.54                 | 0.65 |
| 2-Thiophenecarboxaldehyde                               | 1697 | 1684 | 0.22±0.02                | 0.21±0.01                 | 0.05 |
| Thiophene, 2-methyl-                                    | 1117 | 1122 | 0.04±0.01                | 0.04±0.01                 | 0.01 |
| Propanal, 3-(methylthio)-                               | 1455 | 1457 | 1.38±0.35 <sup>a</sup>   | 0.58±0.05 <sup>b</sup>    | 0.65 |
| 2-Acetyl-2-thiazoline                                   | 1761 | 1763 | 18.48±2.90 <sup>a</sup>  | 10.9±1.43 <sup>b</sup>    | 1.2  |
| Benzothiazole                                           | 1963 | 1967 | 0.21±0.02                | 0.2±0.02                  | 0.07 |
| <b>Nitrogen-containing compounds</b>                    |      |      |                          |                           |      |
| Ethanone, 1-(2-pyridinyl)-                              | 1603 | 1606 | 2.92±2.03 <sup>b</sup>   | 110.24±8.89 <sup>a</sup>  | 7.98 |
| Pyridine, 2-pentyl-                                     | 1570 | 1584 | 2.26±0.30 <sup>b</sup>   | 3.68±0.22 <sup>a</sup>    | 0.45 |

|                                      |      |      |                         |                         |      |
|--------------------------------------|------|------|-------------------------|-------------------------|------|
| Formamide, N,N-dibutyl-              | 1767 | 1757 | 1.41±0.22               | 2.26±0.39               | 0.35 |
| Pyridine, 3-ethyl-                   | 1377 | 1377 | 0.4±0.04                | 0.34±0.02               | 0.12 |
| Pyrazine, 2,3-dimethyl-              | 1318 | 1325 | 0.36±0.15 <sup>a</sup>  | 0.02±0.00 <sup>b</sup>  | 0.81 |
| Pyridine, 2-ethyl-                   | 1278 | 1278 | 0.09±0.01               | 0.09±0.01               | 0    |
| <b>Hydrocarbons</b>                  |      |      |                         |                         |      |
| (3Z,5E)-1,3,5-Undecatriene           | 1404 | 1408 | 3.36±0.89 <sup>b</sup>  | 7.3±0.80 <sup>a</sup>   | 1.01 |
| 4-Octyne                             | 980  | 1000 | 5.17±0.63               | 6.17±0.42               | 0.15 |
| Benzene                              | 959  | 949  | 2.37±0.33               | 2.33±0.15               | 0.07 |
| Benzene, 1,2,3,5-tetramethyl-        | 1414 | 1422 | 0.23±0.03 <sup>a</sup>  | 0.16±0.01 <sup>b</sup>  | 0.21 |
| Benzene, 1,2,3-trimethyl-            | 1340 | 1340 | 0.46±0.06               | 0.32±0.04               | 0.26 |
| Benzene, 1,3-bis(1,1-dimethylethyl)- | 1427 | 1427 | 2.13±0.67               | 1.4±0.64                | 0.53 |
| Benzene, 1,3-dimethyl-               | 1186 | 1143 | 11.72±2.49 <sup>a</sup> | 5.02±0.96 <sup>b</sup>  | 1.32 |
| Benzene, 1-ethyl-2,3-dimethyl-       | 1371 | 1369 | 0.84±0.10 <sup>a</sup>  | 0.51±0.05 <sup>b</sup>  | 0.4  |
| Benzene, 1-ethyl-2,4-dimethyl-       | 1355 | 1348 | 0.18±0.03 <sup>a</sup>  | 0.1±0.01 <sup>b</sup>   | 0.27 |
| Benzene, 1-ethyl-2-methyl-           | 1263 | 1258 | 1.17±0.25               | 0.96±0.10               | 0.19 |
| Benzene, 1-ethyl-3,5-dimethyl-       | 1327 | 1319 | 0.59±0.09 <sup>a</sup>  | 0.32±0.04 <sup>b</sup>  | 0.4  |
| Benzene, 1-methyl-3-propyl-          | 1305 | 1297 | 1.46±0.29 <sup>a</sup>  | 0.5±0.08 <sup>b</sup>   | 0.87 |
| Benzene, 2-ethyl-1,3-dimethyl-       | 1362 | 1359 | 1.34±0.18 <sup>a</sup>  | 0.86±0.03 <sup>b</sup>  | 0.41 |
| Decane                               | 1021 | 1000 | 4.78±1.42 <sup>a</sup>  | 0.96±0.11 <sup>b</sup>  | 1.52 |
| Decane, 5-methyl-                    | 1055 | 1049 | 0.26±0.11               | 0.05±0.01               | 0.63 |
| Dodecane                             | 1197 | 1200 | 9.67±2.96               | 5.85±0.97               | 0.52 |
| Ethylbenzene                         | 1132 | 1129 | 13.6±2.38 <sup>a</sup>  | 6.16±1.73 <sup>b</sup>  | 1.43 |
| Mesitylene                           | 1283 | 1251 | 9.65±1.94               | 7.8±1.17                | 0.45 |
| Octane, 2,4,6-trimethyl-             | 1043 | 1058 | 14.43±5.35 <sup>a</sup> | 2.57±0.35 <sup>b</sup>  | 2.23 |
| o-Xylene                             | 1184 | 1186 | 2.94±0.26 <sup>a</sup>  | 1.31±0.22 <sup>b</sup>  | 0.89 |
| p-Xylene                             | 1135 | 1138 | 27.52±6.47 <sup>a</sup> | 5.21±2.01 <sup>b</sup>  | 2.98 |
| Styrene                              | 1257 | 1270 | 10.32±2.23 <sup>b</sup> | 17.18±1.84 <sup>a</sup> | 0.84 |
| Toluene                              | 1052 | 1049 | 38.62±4.75              | 36.21±4.21              | 0.4  |
| Tridecane                            | 1292 | 1300 | 1.74±0.15               | 1.45±0.12               | 0.26 |
| <b>Others</b>                        |      |      |                         |                         |      |
| 1,8-Cineole                          | 1207 | 1213 | 0.1±0.02                | 0.15±0.02               | 0.11 |
| Butylated Hydroxytoluene             | 1908 | 1909 | 2.36±0.67               | 1.39±0.19               | 0.47 |
| p-Cresol                             | 2079 | 2089 | 1.07±0.41               | 0.62±0.05               | 0.31 |
| Phenol                               | 2003 | 2014 | 0.39±0.04 <sup>a</sup>  | 0.27±0.01 <sup>b</sup>  | 0.21 |

<sup>1</sup> Calculated data based on a homologous series of n-alkanes (C7-C40).

<sup>2</sup> Data obtained from the online database: <http://www.flavornet.org/>, <https://pubchem.ncbi.nlm.nih.gov/>.

<sup>3</sup> Different letters in the same row represent significant differences.

HIMF, high intramuscular fat group; LIMF, low intramuscular fat group; LRI, Linear retention index; VIP, variable importance in projection.

**Table S6.** Odor thresholds and odor active values of odorants in low and high intramuscular fat groups (n=8).

| Class and Component Name             | Concentration<br>(µg/kg) |         | Odor<br>threshold <sup>1</sup> | Odor active<br>values |      |
|--------------------------------------|--------------------------|---------|--------------------------------|-----------------------|------|
|                                      | HIMF                     | LIMF    |                                | HIMF                  | LIMF |
| <i>Aldehydes</i>                     |                          |         |                                |                       |      |
| Pentanal                             | 431.81                   | 338.90  | 12                             | 36                    | 28   |
| Octanal                              | 112.17                   | 89.13   | 3.4                            | 33                    | 26   |
| 2,4-Heptadienal,(E,E)-               | 0.44                     | 0.57    | N/A                            | N/A                   | N/A  |
| 2,4-Decadienal, (E,E)-               | 4.55                     | 8.26    | 0.027                          | 169                   | 306  |
| 2-Butenal, 3-methyl-                 | 2.19                     | 2.42    | N/A                            | N/A                   | N/A  |
| 2-Decenal, (E)-                      | 3.84                     | 3.88    | 0.3                            | 13                    | 13   |
| 2-Hexenal, (E)-                      | 0.53                     | 0.33    | 82                             | 0                     | 0    |
| 2-Octenal, (E)-                      | 41.34                    | 42.68   | 4                              | 10                    | 11   |
| 2-Nonenal, (E)-                      | 3.33                     | 3.65    | 0.09                           | 37                    | 41   |
| Hexanal                              | 2344.96                  | 2235.94 | 5                              | 469                   | 447  |
| Nonanal                              | 366.76                   | 447.64  | 1.1                            | 333                   | 407  |
| Trans,trans-Nona-2,4-dienal          | 0.99                     | 1.32    | 0.1                            | 10                    | 13   |
| 2-Octenal, 2-butyl-                  | 2.24                     | 18.19   | N/A                            | N/A                   | N/A  |
| 2-Pentenal, (E)-                     | 3.76                     | 2.45    | 310                            | 0                     | 0    |
| 5-Ethyl-2-furaldehyde                | 0.27                     | 0.34    | N/A                            | N/A                   | N/A  |
| Benzaldehyde                         | 397.68                   | 527.61  | 350                            | 1                     | 2    |
| Benzaldehyde, 2-hydroxy-             | 3.32                     | 3.45    | 30                             | 0                     | 0    |
| Benzaldehyde, 2-methyl-              | 0.32                     | 0.33    | N/A                            | N/A                   | N/A  |
| Benzaldehyde, 3,5-dimethyl-          | 0.14                     | 0.12    | N/A                            | N/A                   | N/A  |
| Benzaldehyde, 4-ethyl-               | 10.50                    | 15.63   | N/A                            | N/A                   | N/A  |
| Benzaldehyde, 4-pentyl-              | 1.64                     | 4.23    | N/A                            | N/A                   | N/A  |
| Benzeneacetaldehyde                  | 0.84                     | 0.63    | 2                              | 0                     | 0    |
| Butanal                              | 2.85                     | 2.33    | 8.2                            | 0                     | 0    |
| 2-Heptenal, (E)-                     | 60.26                    | 56.76   | 13                             | 5                     | 4    |
| Dodecanal                            | 3.34                     | 7.80    | 10                             | 0                     | 1    |
| E-Citral                             | 0.40                     | 1.12    | 32                             | 0                     | 0    |
| Furfural                             | 1.17                     | 0.99    | 282                            | 0                     | 0    |
| Heptanal                             | 111.73                   | 116.40  | 2.8                            | 40                    | 42   |
| (E)-2-Undecenal                      | 3.01                     | 3.22    | 0.78                           | 4                     | 4    |
| Hexadecanal                          | 1.15                     | 1.59    | N/A                            | N/A                   | N/A  |
| Decanal                              | 4.53                     | 5.93    | 3                              | 2                     | 2    |
| Undecanal                            | 5.82                     | 8.68    | 12.5                           | 0                     | 1    |
| 3-Cyclohexene-1-carboxaldehyde       | 3.56                     | 3.18    | N/A                            | N/A                   | N/A  |
| 5-Ethylcyclopent-1-enecarboxaldehyde | 31.79                    | 27.18   | N/A                            | N/A                   | N/A  |
| <i>Ketones</i>                       |                          |         |                                |                       |      |
| 1-Octen-3-one                        | 3.65                     | 2.33    | 0.016                          | 228                   | 146  |
| 1-Propanone, 1-(1-cyclohexen-1-yl)-  | 1.26                     | 3.45    | N/A                            | N/A                   | N/A  |
| 2(3H)-Furanone, 5-butyldihydro-      | 0.03                     | 0.03    | 6.5                            | 0                     | 0    |
| 2(3H)-Furanone, 5-ethyldihydro-      | 0.03                     | 0.03    | 260                            | 0                     | 0    |
| 2(3H)-Furanone, dihydro-5-pentyl-    | 0.06                     | 0.05    | 9.7                            | 0                     | 0    |
| 2(3H)-Furanone, dihydro-5-propyl-    | 0.02                     | 0.02    | 400                            | 0                     | 0    |
| 3(2H)-Furanone, 4-hydroxy-5-methyl-  | 0.27                     | 0.00    | N/A                            | N/A                   | N/A  |

|                                                              |        |        |       |     |     |
|--------------------------------------------------------------|--------|--------|-------|-----|-----|
| 2,3-Octanedione                                              | 724.27 | 980.71 | N/A   | N/A | N/A |
| 2,3-Pentanedione                                             | 2.45   | 4.00   | 20    | 0   | 0   |
| 2,5-Hexanedione                                              | 0.14   | 0.03   | N/A   | N/A | N/A |
| 2-Butanone                                                   | 5.11   | 0.18   | 35000 | 0   | 0   |
| 2-Heptanone                                                  | 21.18  | 22.77  | 140   | 0   | 0   |
| 2-Heptanone, 4,6-dimethyl-                                   | 16.26  | 18.14  | N/A   | N/A | N/A |
| 2-Heptanone, 6-methyl-                                       | 0.51   | 1.10   | 8.1   | 0   | 0   |
| 2-Nonanone                                                   | 0.73   | 0.66   | 5     | 0   | 0   |
| 2-Octanone                                                   | 1.48   | 2.20   | 5     | 0   | 0   |
| 2-Pyrrolidinone                                              | 0.48   | 0.28   | N/A   | N/A | N/A |
| 2-Pyrrolidinone, 1-methyl-                                   | 0.06   | 0.02   | N/A   | N/A | N/A |
| 3,5-Octadien-2-one                                           | 6.15   | 9.56   | N/A   | N/A | N/A |
| 3-Octanone                                                   | 3.51   | 4.77   | 21.4  | 0   | 0   |
| 3-Octen-2-one                                                | 8.04   | 11.41  | N/A   | N/A | N/A |
| 5,9-Undecadien-2-one, 6,10-dimethyl-, (Z)-                   | 2.39   | 4.88   | N/A   | N/A | N/A |
| 6-Methyl-5-hepten-2-one                                      | 12.85  | 13.91  | 50    | 0   | 0   |
| 6-Undecanone                                                 | 0.14   | 0.60   | 85    | 0   | 0   |
| Acetoin                                                      | 0.49   | 0.47   | 14    | 0   | 0   |
| Cyclohexanone                                                | 0.25   | 0.30   | 280   | 0   | 0   |
| Ethanone, 1,1'-(1,3-phenylene)bis-                           | 0.03   | 0.03   | N/A   | N/A | N/A |
| Isophorone                                                   | 0.13   | 0.05   | 11000 | 0   | 0   |
| 2,6-Di-tert-butyl-4-hydroxy-4-methylcyclohexa-2,5-dien-1-one | 15.00  | 9.32   | N/A   | N/A | N/A |
| <b>Alcohols</b>                                              |        |        |       |     |     |
| 1-Pentanol                                                   | 219.82 | 157.22 | 150   | 1   | 1   |
| 1-Octen-3-ol                                                 | 137.01 | 150.08 | 45    | 3   | 3   |
| (S)-(+)-3-Methyl-1-pentanol                                  | 9.36   | 7.60   | N/A   | N/A | N/A |
| 1-Hexanol                                                    | 9.00   | 8.63   | 500   | 0   | 0   |
| 1-Decanol                                                    | 0.98   | 2.01   | 47    | 0   | 0   |
| 1-Dodecanol                                                  | 0.98   | 1.34   | 16    | 0   | 0   |
| Benzenemethanol                                              | 0.80   | 0.66   | 2500  | 0   | 0   |
| Ethanol, 2-phenoxy-                                          | 0.14   | 0.12   | N/A   | N/A | N/A |
| 5-Octen-1-ol, (Z)-                                           | 1.34   | 1.86   | 6     | 0   | 0   |
| 1,6-Heptadien-4-ol                                           | 1.96   | 1.00   | N/A   | N/A | N/A |
| Nerol                                                        | 0.31   | 0.41   | 680   | 0   | 0   |
| <b>Acids</b>                                                 |        |        |       |     |     |
| Hexanoic acid                                                | 18.97  | 22.97  | 3000  | 0   | 0   |
| Acetic acid                                                  | 3.60   | 1.89   | 99000 | 0   | 0   |
| Decanoic acid                                                | 2.91   | 1.80   | 130   | 0   | 0   |
| Octanoic acid                                                | 2.03   | 1.45   | 1400  | 0   | 0   |
| Heptanoic acid                                               | 1.45   | 1.08   | 640   | 0   | 0   |
| Pentanoic acid                                               | 0.76   | 0.64   | 24    | 0   | 0   |
| Butanoic acid                                                | 0.56   | 0.29   | 204   | 0   | 0   |
| Hexanoic acid, 2-ethyl-                                      | 0.20   | 0.25   | 27000 | 0   | 0   |
| Dodecanoic acid                                              | 0.18   | 0.09   | N/A   | N/A | N/A |
| <b>Esters</b>                                                |        |        |       |     |     |
| Formic acid, octyl ester                                     | 29.03  | 20.13  | N/A   | N/A | N/A |

|                                                         |        |        |      |     |     |
|---------------------------------------------------------|--------|--------|------|-----|-----|
| 1,2-Benzenedicarboxylic acid, bis(2-methylpropyl) ester | 15.12  | 13.51  | N/A  | N/A | N/A |
| n-Caproic acid vinyl ester                              | 0.76   | 1.19   | N/A  | N/A | N/A |
| Decanoic acid, ethyl ester                              | 0.21   | 0.12   | 5    | 0   | 0   |
| Hexadecanoic acid, methyl ester                         | 0.14   | 0.20   | 2000 | 0   | 0   |
| Nonanoic acid, ethyl ester                              | 0.37   | 0.10   | 370  | 0   | 0   |
| Pentanoic acid, pentyl ester                            | 0.06   | 0.20   | 26   | 0   | 0   |
| Acetic acid, cyclohexyl ester                           | 0.07   | 0.20   | N/A  | N/A | N/A |
| Benzoic acid, 2-hydroxy-, methyl ester                  | 0.15   | 0.13   | 40   | 0   | 0   |
| Octanoic acid, ethyl ester                              | 0.19   | 0.08   | 19   | 0   | 0   |
| Nonanoic acid, methyl ester                             | 0.14   | 0.18   | N/A  | N/A | N/A |
| Propanoic acid, 2-methyl-, butyl ester                  | 0.27   | 0.04   | 93   | 0   | 0   |
| Decanoic acid, methyl ester                             | 0.07   | 0.06   | 4.3  | 0   | 0   |
| Hexanedioic acid, bis(2-methylpropyl) ester             | 0.04   | 0.03   | N/A  | N/A | N/A |
| Butanoic acid, butyl ester                              | 0.09   | 0.02   | 400  | 0   | 0   |
| Dodecanoic acid, ethyl ester                            | 0.02   | 0.02   | 400  | 0   | 0   |
| Trans-Methyl Dihydrojasmonate                           | 0.05   | 0.05   | N/A  | N/A | N/A |
| 1-Methoxy-2-propyl acetate                              | 0.12   | 0.08   | N/A  | N/A | N/A |
| Triacetin                                               | 0.11   | 0.04   | N/A  | N/A | N/A |
| Diethyl Phthalate                                       | 0.16   | 0.13   | N/A  | N/A | N/A |
| Anisyl propionate                                       | 0.18   | 0.20   | N/A  | N/A | N/A |
| Tributyl phosphate                                      | 0.23   | 0.22   | N/A  | N/A | N/A |
| Dimethyl phthalate                                      | 0.60   | 0.51   | N/A  | N/A | N/A |
| Hexanoic acid, thio-, S-butyl ester                     | 1.45   | 3.64   | N/A  | N/A | N/A |
| Hexanethioic acid, S-methyl ester                       | 0.34   | 0.52   | 0.3  | 1   | 2   |
| <b>Furans</b>                                           |        |        |      |     |     |
| Furan, 2-pentyl-                                        | 118.40 | 287.83 | 5.8  | 20  | 50  |
| Furan, 3-methyl-                                        | 0.03   | 0.07   | N/A  | N/A | N/A |
| Furan, 2-ethyl-                                         | 5.83   | 6.17   | N/A  | N/A | N/A |
| trans-Linalool oxide (furanoid)                         | 1.95   | 4.52   | 60   | 0   | 0   |
| 1-Propanone, 1-(5-methyl-2-furanyl)-                    | 0.25   | 0.38   | N/A  | N/A | N/A |
| 1-Pentanone, 1-(2-furanyl)-                             | 0.17   | 0.49   | N/A  | N/A | N/A |
| 2-Butylfuran                                            | 4.81   | 0.15   | 5    | 1   | 0   |
| Furan, 2-hexyl-                                         | 0.12   | 0.24   | N/A  | N/A | N/A |
| <b>Sulfur-containing compounds</b>                      |        |        |      |     |     |
| Dimethyl sulfone                                        | 2.65   | 1.08   | N/A  | N/A | N/A |
| Thiophene, 2-pentyl-                                    | 3.59   | 11.06  | N/A  | N/A | N/A |
| 5-Methyl-2-thiophenecarboxaldehyde                      | 3.88   | 2.63   | N/A  | N/A | N/A |
| 2-Thiophenecarboxaldehyde                               | 0.22   | 0.21   | 5000 | 0   | 0   |
| Thiophene, 2-methyl-                                    | 0.04   | 0.04   | N/A  | N/A | N/A |
| 2-Acetyl-2-thiazoline                                   | 18.48  | 10.90  | 0.12 | 154 | 91  |
| Benzothiazole                                           | 0.21   | 0.20   | 80   | 0   | 0   |
| Propanal, 3-(methylthio)-                               | 1.38   | 0.58   | 0.2  | 7   | 3   |
| <b>Nitrogen-containing compounds</b>                    |        |        |      |     |     |
| Pyridine, 2-pentyl-                                     | 2.26   | 3.68   | 0.6  | 4   | 6   |
| Ethanone, 1-(2-pyridinyl)-                              | 2.92   | 110.24 | 19   | 0   | 6   |
| Formamide, N,N-dibutyl-                                 | 1.41   | 2.26   | N/A  | N/A | N/A |
| Pyridine, 3-ethyl-                                      | 0.40   | 0.34   | N/A  | N/A | N/A |



|                                      |       |       |       |     |     |
|--------------------------------------|-------|-------|-------|-----|-----|
| Pyrazine, 2,3-dimethyl-              | 0.36  | 0.02  | 400   | 0   | 0   |
| Pyridine, 2-ethyl-                   | 0.09  | 0.09  | N/A   | N/A | N/A |
| <b>Hydrocarbons</b>                  |       |       |       |     |     |
| (3Z,5E)-1,3,5-Undecatriene           | 3.36  | 7.30  | N/A   | N/A | N/A |
| 4-Octyne                             | 5.17  | 6.17  | N/A   | N/A | N/A |
| Benzene                              | 2.37  | 2.33  | 72    | 0   | 0   |
| Benzene, 1,2,3,5-tetramethyl-        | 0.23  | 0.16  | N/A   | N/A | N/A |
| Benzene, 1,2,3-trimethyl-            | 0.46  | 0.32  | N/A   | N/A | N/A |
| Benzene, 1,3-bis(1,1-dimethylethyl)- | 2.13  | 1.40  | N/A   | N/A | N/A |
| Benzene, 1,3-dimethyl-               | 11.72 | 5.02  | N/A   | N/A | N/A |
| Benzene, 1-ethyl-2,3-dimethyl-       | 0.84  | 0.51  | N/A   | N/A | N/A |
| Benzene, 1-ethyl-2,4-dimethyl-       | 0.18  | 0.10  | N/A   | N/A | N/A |
| Benzene, 1-ethyl-2-methyl-           | 1.17  | 0.96  | N/A   | N/A | N/A |
| Benzene, 1-ethyl-3,5-dimethyl-       | 0.59  | 0.32  | N/A   | N/A | N/A |
| Benzene, 1-methyl-3-propyl-          | 1.46  | 0.50  | N/A   | N/A | N/A |
| Benzene, 2-ethyl-1,3-dimethyl-       | 1.34  | 0.86  | N/A   | N/A | N/A |
| Decane                               | 4.78  | 0.96  | 130   | 0   | 0   |
| Decane, 5-methyl-                    | 0.26  | 0.05  | N/A   | N/A | N/A |
| Dodecane                             | 9.67  | 5.85  | 10000 | 0   | 0   |
| Ethylbenzene                         | 13.60 | 6.16  | 22000 | 0   | 0   |
| Mesitylene                           | 9.65  | 7.80  | 700   | 0   | 0   |
| Octane, 2,4,6-trimethyl-             | 14.43 | 2.57  | N/A   | N/A | N/A |
| o-Xylene                             | 2.94  | 1.31  | 450   | 0   | 0   |
| p-Xylene                             | 27.52 | 5.21  | 1000  | 0   | 0   |
| Styrene                              | 10.32 | 17.18 | 65    | 0   | 0   |
| Toluene                              | 38.62 | 36.21 | 527   | 0   | 0   |
| Tridecane                            | 1.74  | 1.45  | N/A   | N/A | N/A |
| <b>Others</b>                        |       |       |       |     |     |
| 1,8-Cineole                          | 0.10  | 0.15  | 1.1   | 0   | 0   |
| Butylated Hydroxytoluene             | 2.36  | 1.39  | 1     | 2   | 1   |
| p-Cresol                             | 1.07  | 0.62  | 3.9   | 0   | 0   |
| Phenol                               | 0.39  | 0.27  | 500   | 0   | 0   |

<sup>1</sup>Odor threshold in water obtained from the literature [van Gemert, L. J. (2011). Compilations of odour threshold values in air, water and other media. (Edition 2011 ed.). The Netherlands: Oliemans Punter & Partners BV, Zeist.]

HIMF, high intramuscular fat group; LIMF, low intramuscular fat group. N/A, Not Available

**Table S7.** Odorants (OAV>1) in the low and high intramuscular fat groups (n=8).

| NO.    | Odorants name                     | OAV  |      |
|--------|-----------------------------------|------|------|
|        |                                   | HIMF | LIMF |
| Odor1  | Hexanal                           | 469  | 447  |
| Odor2  | Nonanal                           | 333  | 407  |
| Odor3  | 1-Octen-3-one                     | 228  | 146  |
| Odor4  | 2,4-Decadienal, ( <i>E,E</i> )-   | 169  | 306  |
| Odor5  | 2-Acetyl-2-thiazoline             | 154  | 91   |
| Odor6  | Heptanal                          | 40   | 42   |
| Odor7  | 2-Nonenal, ( <i>E</i> )-          | 37   | 41   |
| Odor8  | Pentanal                          | 36   | 28   |
| Odor9  | Octanal                           | 33   | 26   |
| Odor10 | Furan, 2-pentyl-                  | 20   | 50   |
| Odor11 | 2-Decenal, ( <i>E</i> )-          | 13   | 13   |
| Odor12 | 2-Octenal, ( <i>E</i> )-          | 10   | 11   |
| Odor13 | Trans,trans-Nona-2,4-dienal       | 10   | 13   |
| Odor14 | Propanal, 3-(methylthio)-         | 7    | 3    |
| Odor15 | 2-Heptenal, ( <i>E</i> )-         | 5    | 4    |
| Odor16 | ( <i>E</i> )-2-Undecenal          | 4    | 4    |
| Odor17 | Pyridine, 2-pentyl-               | 4    | 6    |
| Odor18 | 1-Octen-3-ol                      | 3    | 3    |
| Odor19 | Decanal                           | 2    | 2    |
| Odor20 | Ethanone, 1-(2-pyridinyl)-        | 0    | 6    |
| Odor21 | Butylated Hydroxytoluene          | 2    | 1    |
| Odor22 | Benzaldehyde                      | 1    | 2    |
| Odor23 | Hexanethioic acid, S-methyl ester | 1    | 2    |

Abbreviations: HIMF, high intramuscular fat group; LIMF, low intramuscular fat group; OAV, odor active values.

**Table S8.** Significantly changed odorants between the low and high intramuscular fat groups (n=8).

| Odorants name              | OAV  |      | <i>P</i> -value | VIP  |
|----------------------------|------|------|-----------------|------|
|                            | HIMF | LIMF |                 |      |
| Pentanal                   | 36   | 28   | 0.0215          | 1.82 |
| 2-Acetyl-2-thiazoline      | 154  | 91   | 0.0345          | 1.20 |
| Furan, 2-pentyl-           | 20   | 50   | 0.0126          | 3.46 |
| Ethanone, 1-(2-pyridinyl)- | 0    | 6    | 0.0000          | 7.98 |
| Octanal                    | 33   | 26   | 0.0470          | 1.24 |

Abbreviations: HIMF, high intramuscular fat group; LIMF, low intramuscular fat group; VIP, variable importance in projection, OAV, odor active values

**Table S9.** Correlation between the fatty acids and differential odorants.

| Correlation coefficient   |                       |         |                            |                  |          |          |         |          |          |           |          |          |            |          |          |          |          |          |          |          |          |          |          |          |           |          |          |
|---------------------------|-----------------------|---------|----------------------------|------------------|----------|----------|---------|----------|----------|-----------|----------|----------|------------|----------|----------|----------|----------|----------|----------|----------|----------|----------|----------|----------|-----------|----------|----------|
|                           | 2-Acetyl-2-thiazoline | Octanal | Ethanone, 1-(2-pyridinyl)- | Furan, 2-pentyl- | Pentanal | C14:1    | C15:0   | C16:1    | C17:0    | C18:0     | C18:1n9c | C18:2n6c | C21:0      | C20:2    | C20:3n6  | C20:4n6  | C20:3n3  | C22:0    | C20:5n3  | C23:0    | C24:0    | C24:1    | C22:6n3  | SFA      | MUF A     | PUFA     |          |
| 2-Acetyl-2-thiazoline     | 1                     | 0.61176 | -0.6                       | -0.6571          | 0.61471  | 0.49521  | -0.5012 | 0.62647  | -0.42984 | -0.64412  | 0.73824  | -0.68235 | -0.47717   | -0.74224 | -0.75812 | -0.78056 | -0.33838 | -0.17192 | -0.40296 | -0.62377 | -0.62972 | -0.44    | -0.62622 | -0.66126 | -0.359893 | 0.74118  | -0.67059 |
| Octanal                   |                       | 1       | -0.46471                   | 0.7171           | 0.71471  | 0.38771  | -0.1137 | 0.39706  | -0.18759 | -0.42941  | 0.51765  | -0.41471 | -0.43004   | -0.5852  | -0.58555 | -0.58468 | -0.34736 | -0.37823 | -0.30108 | -0.58997 | -0.46572 | -0.44413 | -0.35893 | -0.34808 | 0.52059   | -0.45    |          |
| Ethanone, 1-(2-pyridinyl) |                       |         | 1                          | 0.42647          | -0.71118 | -0.36257 | 0.47271 | -0.53235 | 0.59825  | 0.62989   | -0.75266 | 0.62052  | 0.61267    | 0.70817  | 0.72419  | 0.69572  | 0.42284  | 0.52922  | 0.62396  | 0.75822  | 0.75918  | 0.69876  | 0.81168  | 0.47493  | -0.69706  | 0.68235  |          |
| Furan, 2-pentyl-          |                       |         |                            | 1                | -0.39118 | -0.64407 | 0.63585 | -0.77941 | 0.58789  | 0.71176   | -0.64118 | 0.66471  | 0.70398    | 0.74224  | 0.6062   | 0.59941  | 0.71419  | 0.15249  | 0.62801  | 0.59612  | 0.63859  | 0.57884  | 0.48701  | 0.18289  | -0.72941  | 0.65588  |          |
| Pentanal                  |                       |         |                            |                  | 1        | 0.56448  | -0.4234 | 0.56471  | -0.6647  | -0.7707   | 0.68824  | -0.44706 | -0.52283   | -0.81928 | -0.66372 | -0.75258 | -0.58542 | -0.69516 | -0.6569  | -0.74822 | -0.76719 | -0.74169 | -0.6419  | -0.77286 | 0.68824   | -0.50882 |          |
| C14:1                     |                       |         |                            |                  |          | 1        | 0.7878  | 0.86072  | -0.72169 | -0.75608  | 0.51732  | -0.52469 | -0.58893   | -0.62659 | -0.51987 | -0.6537  | -0.72102 | -0.14983 | -0.30327 | -0.56818 | -0.37926 | -0.61054 | -0.35748 | -0.31042 | 0.62344   | -0.57038 |          |
| C15:0                     |                       |         |                            |                  |          |          | 1       | 0.80191  | 0.82125  | -0.801769 | -0.78444 | 0.6946   | -0.7670442 | -0.72189 | -0.78895 | -0.6634  | -0.73431 | -0.72724 | -0.1596  | -0.49132 | -0.67645 | -0.56352 | -0.68001 | -0.55212 | -0.28687  | 0.79448  |          |
| C16:1                     |                       |         |                            |                  |          |          |         | 1        | 0.3535   | 0.7171    | 265      | 6565     | -0.72117   | -0.78872 | -0.66391 | -0.73472 | -0.72766 | -0.15697 | -0.49116 | -0.67601 | -0.5632  | -0.68099 | -0.55254 | -0.28614 | 0.79412   |          |          |
| C17:0                     |                       |         |                            |                  |          |          |         |          | 1        | 0.87889   | -0.66766 | 0.55687  | 0.51627    | 0.7314   | 0.60667  | 0.65681  | 0.7527   | 0.47901  | 0.60865  | 0.5625   | 0.66741  | 0.75762  | 0.62156  | 0.6163   | -0.70459  | 0.61448  |          |
| C18:0                     |                       |         |                            |                  |          |          |         |          |          | 1         | 0.83235  | 0.62941  | 0.60678    | 0.86965  | 0.84219  | 0.84683  | 0.80252  | 0.52324  | 0.64322  | 0.72057  | 0.8145   | 0.90454  | 0.75955  | 0.69027  | -0.85882  | 0.70882  |          |
| C18:1n9c                  |                       |         |                            |                  |          |          |         |          |          |           | 1        | -0.86765 | -0.68041   | -0.81336 | -0.93953 | -0.91605 | -0.58542 | -0.43803 | -0.62801 | -0.72364 | -0.84258 | -0.87493 | -0.90849 | -0.58702 | 0.97059   | -0.89412 |          |
| C18:2n6c                  |                       |         |                            |                  |          |          |         |          |          |           |          | 1        | 0.70398    | 0.67706  | 0.78319  | 0.82327  | 0.41923  | 0.07475  | 0.42273  | 0.58536  | 0.62233  | 0.65434  | 0.69254  | 0.20944  |           | 0.97941  |          |
| C21:0                     |                       |         |                            |                  |          |          |         |          |          |           |          |          | 1          | 0.7923   | 0.56278  | 0.56342  | 0.68075  | 0.39315  | 0.59386  | 0.71089  | 0.70689  | 0.69682  | 0.55634  | 0.19498  | -0.69514  | 0.6922   |          |
| C20:2                     |                       |         |                            |                  |          |          |         |          |          |           |          |          |            | 1        | 0.76078  | 0.77746  | 0.72628  | 0.62653  | 0.72766  | 0.79016  | 0.90097  | 0.85981  | 0.7442   | 0.54532  | -0.82076  | 0.69928  |          |
| C20:3n6                   |                       |         |                            |                  |          |          |         |          |          |           |          |          |            |          | 1        | 0.93058  | 0.53384  | 0.3711   | 0.51701  | 0.73656  | 0.79022  | 0.85153  | 0.83648  | 0.55769  | -0.92331  | 0.85989  |          |
| C20:4n6                   |                       |         |                            |                  |          |          |         |          |          |           |          |          |            |          |          | 1        | 0.48807  | 0.32189  | 0.46218  | 0.72009  | 0.73724  | 0.83248  | 0.79498  | 0.56869  | -0.9352   | 0.87924  |          |
| C20:3n3                   |                       |         |                            |                  |          |          |         |          |          |           |          |          |            |          |          |          | 1        | 0.50076  | 0.56626  | 0.65092  | 0.65092  | 0.64209  | 0.4784   | 0.47903  | -0.64232  | 0.46714  |          |
| C22:0                     |                       |         |                            |                  |          |          |         |          |          |           |          |          |            |          |          |          |          | 1        | 0.65079  | 0.73429  | 0.76175  | 0.60595  | 0.60542  | 0.56428  | -0.61722  | 0.43907  |          |
| C20:5n3                   |                       |         |                            |                  |          |          |         |          |          |           |          |          |            |          |          |          |          |          | 1        | 0.73475  | 0.68295  | 0.85742  | 0.82598  | 0.62129  | -0.79837  | 0.66046  |          |
| C23:0                     |                       |         |                            |                  |          |          |         |          |          |           |          |          |            |          |          |          |          |          |          | 1        | 0.6161   | 0.85714  | 0.84259  | 0.65182  | -0.82163  | 0.71652  |          |
| C24:0                     |                       |         |                            |                  |          |          |         |          |          |           |          |          |            |          |          |          |          |          |          |          | 1        | 0.82514  | 0.84259  | 0.58582  | -0.81663  | 0.72652  |          |
| C24:1                     |                       |         |                            |                  |          |          |         |          |          |           |          |          |            |          |          |          |          |          |          |          |          | 1        | 0.5954   | 0.8215   | -0.81615  | 0.72679  |          |
| C22:6n3                   |                       |         |                            |                  |          |          |         |          |          |           |          |          |            |          |          |          |          |          |          |          |          |          | 1        | 0.5415   | -0.81615  | 0.72679  |          |

|      |          |          |          |          |          |          |          |          |          |          |          |         |          |          |          |         |          |          |          |          |          |          |          |          |          |          |
|------|----------|----------|----------|----------|----------|----------|----------|----------|----------|----------|----------|---------|----------|----------|----------|---------|----------|----------|----------|----------|----------|----------|----------|----------|----------|----------|
| SFA  | -0.35988 | -0.34808 | 0.47493  | 0.18289  | -0.77286 | -0.31042 | 0.35412  | -0.28614 | 0.6163   | 0.69027  | -0.58702 | 0.20944 | 0.19498  | 0.54532  | 0.55769  | 0.56869 | 0.47903  | 0.67322  | 0.56429  | 0.50388  | 0.6212   | 0.65182  | 0.58554  | -0.5571  | 0.28652  | 0.28614  |
| MUFA | 0.74118  | 0.52059  | -0.69706 | -0.72941 | 0.68824  | 0.62344  | -0.62687 | 0.79412  | -0.70459 | -0.85882 | 0.97059  | -0.9    | -0.69514 | -0.82076 | -0.92331 | -0.9352 | -0.64232 | -0.33936 | -0.61737 | -0.72671 | -0.79824 | -0.82163 | -0.81615 | -0.55752 | 1        | -0.92941 |
| PUFA | -0.67059 | -0.45    | 0.68235  | 0.65588  | -0.50882 | -0.57038 | 0.58348  | -0.79412 | 0.61448  | 0.70882  | -0.89412 | 0.97941 | 0.6922   | 0.69928  | 0.85989  | 0.87924 | 0.46714  | 0.12707  | 0.43946  | 0.65297  | 0.66076  | 0.71652  | 0.72679  | 0.28614  | -0.92941 | 1        |

| P-value                      |                           |               |                                   |                         |                |               |                |                     |              |                     |              |                |                |                       |                             |                             |                |               |                |                     |                     |                     |                           |               |                |                    |
|------------------------------|---------------------------|---------------|-----------------------------------|-------------------------|----------------|---------------|----------------|---------------------|--------------|---------------------|--------------|----------------|----------------|-----------------------|-----------------------------|-----------------------------|----------------|---------------|----------------|---------------------|---------------------|---------------------|---------------------------|---------------|----------------|--------------------|
| Label                        | 2-Acetyl-2-thi<br>azoline | Octan<br>al   | Ethanone,<br>1-(2-pyridi<br>nyl)- | Furan,<br>2-pent<br>yl- | Penta<br>nal   | C14:1         | C15:0          | C16:1<br>0.009<br>4 | C17:0        | C18:0<br>0.007<br>1 | C18:1<br>n9c | C18:2<br>n6c   | C21:0          | C20:2<br>9.90E<br>-04 | C20:3<br>n6<br>6.70E<br>-04 | C20:4<br>n6<br>3.60E<br>-04 | C20:3<br>n3    | C22:0         | C20:5<br>n3    | C23:0<br>0.009<br>8 | C24:0<br>0.008<br>9 | C24:1<br>0.009<br>5 | C22:6<br>n3<br>0.005<br>3 | SFA           | MUF<br>A       | PUFA<br>0.004<br>5 |
| 2-Acetyl-2-thi<br>azoline    | 0                         | 0.012         | 0.014                             | 0.0064                  | 0.011<br>0.001 | 0.051         | 0.048          | 0.009<br>4          | 0.097        | 0.007<br>1          | 0.0011       | 0.0036         | 0.062          | 9.90E<br>-04          | 6.70E<br>-04                | 3.60E<br>-04                | 0.2            | 0.52          | 0.12           | 0.009<br>8          | 0.008<br>9          | 0.009<br>5          | 0.005<br>3                | 0.17          | 0.001          | 0.004<br>5         |
| Octanal                      | 0.012                     | 0             | 0.07                              | 0.42                    | 0.009          | 0.14          | 0.68           | 0.13                | 0.49         | 0.097               | 0.04         | 0.11           | 0.096          | 0.017                 | 0.017                       | 0.017                       | 0.19           | 0.15          | 0.26           | 0.016               | 0.069               | 0.085               | 0.17                      | 0.19          | 0.039          | 0.08               |
| Ethanone,<br>1-(2-pyridinyl) |                           |               |                                   |                         |                |               |                |                     |              | 7.60E-<br>04        |              |                |                | 0.002<br>1            | 0.001<br>5                  | 0.002<br>8                  |                |               | 0.009<br>9     | 6.50E<br>-04        | 6.40E<br>-04        | 0.002<br>6          | 1.30E<br>-04              |               | 0.002<br>7     | 0.003<br>6         |
| Furan,<br>2-pentyl-          | 0.014                     | 0.07          | 0                                 | 0.099                   | 0.002          | 0.17<br>0.007 | 0.064<br>0.008 | 0.034<br>3.70E      | 0.014        | 0.009               | 0.0074       | 0.005          | 0.002<br>3     | 9.90E<br>-04          | 0.013<br>1.00E              | 0.014<br>7.70E              | 0.001<br>9     | 0.57<br>0.002 | 0.009<br>2     | 0.015<br>8.60E      | 8<br>5.20E          | 0.019<br>0.007      | 0.056<br>4.50E            | 0.5<br>0.003  | 0.001<br>0.003 | 0.005<br>8         |
| Pentanal                     | 0.0064                    | 0.42<br>0.001 | 0.099                             | 0                       | 0.13           | 1             | 1              | -04                 | 0.017        | 0.002<br>4.80E      | 0.0032       | 0.083          | 0.038          | -04<br>0.009          | 1                           | -04                         | 0.017<br>0.001 | 8             | 7              | -04<br>-04          | -04                 | 0.001               | 3                         | -04           | 2              | 0.044              |
| C14:1                        | 0.051                     | 0.14          | 0.17                              | 0.0071                  | 0.023          | 0             | 0.02           | -05<br>1.90E        | 6<br>9.60E   | -04<br>5.00E        | 0.04         | 0.037          | 0.016          | 4<br>0.005            | 0.039                       | 0.006                       | 6              | 0.58          | 0.25           | 0.022               | 0.15                | 0.012               | 0.17                      | 0.24          | 9              | 0.021              |
| C15:0                        | 0.048                     | 0.68          | 0.064                             | 0.0081                  | 0.1            | 0.02          | 0              | -04<br>1.90E        | -05<br>9.60E | -04<br>5.00E        | 0.014        | 0.027          | 0.086          | 9                     | 0.023                       | 0.035                       | 0.004          | 0.46          | 0.027          | 0.073               | 0.022               | 0.01                | 6                         | 0.18          | 4              | 0.018              |
| C16:1                        | 0.0094                    | 0.13          | 0.034                             | 3.70E-<br>04            | 0.023          | 1.90E<br>-05  | 1.90E<br>-04   | 0                   | 3.20E<br>-04 | 1.20E<br>-04        | 0.0029       | 5.20E-<br>04   | 0.001<br>6     | 2.90E<br>-04          | 0.005<br>1                  | 0.001<br>2                  | 0.001<br>4     | 0.56          | 0.053          | 0.004               | 0.023<br>7          | 0.026               | 0.28                      | -04           | 2.40E<br>-04   |                    |
| C17:0                        | 0.097                     | 0.49          | 0.014                             | 0.017                   | 0.005          | 9.60E<br>-05  | 9.60E<br>-04   | 3.20E<br>-04        | 0            | 7.40E<br>-06        | 0.0047       | 0.025          | 0.041          | 3                     | 0.013                       | 7                           | 7.70E<br>-04   | 0.06          | 0.012          | 0.023<br>7          | 0.004<br>6.70E      | 0.01                | 0.011                     | 3             | 0.011          |                    |
| C18:0                        | 0.0071                    | 0.097         | 0.009                             | 0.002                   | 4.80E<br>-04   | 7.00E<br>-04  | 5.00E<br>-04   | 1.20E<br>-04        | 7.40E<br>-06 | 6.30E-<br>05        | 0.009        | 0.009          | 0.013          | 1.20E<br>-05          | 4.30E<br>-05                | 3.50E<br>-05                | 1.80E<br>-04   | 0.038         | 0.007<br>2     | 0.001<br>6          | 1.20E<br>-04        | 1.50E<br>-06        | 6.40E<br>-04              | 0.003<br>1    | 2.00E<br>-05   |                    |
| C18:1n9c                     | 0.0011                    | 0.04          | 7.60E-04                          | 0.0074                  | 0.003<br>2     | 0.04          | 0.014          | 0.002<br>9          | 0.004<br>7   | 6.30E<br>-05        | 1.30E<br>-05 | 0.003<br>05    | 0.003<br>7     | 1.30E<br>-04          | 6.70E<br>-08                | 6.30E<br>-07                | 0.017          | 0.009<br>2    | 0.009<br>2     | 0.001<br>5          | 4.20E<br>-05        | 9.20E<br>-06        | 1.10E<br>-06              | 0.017         | 4.70E<br>-10   |                    |
| C18:2n6c                     | 0.0036                    | 0.11          | 0.01                              | 0.005                   | 0.083          | 0.037         | 0.027          | 5.20E<br>-04        | 0.025        | 0.009               | 1.30E-<br>05 | 0              | 3              | 0.004<br>2.50E        | 3.30E<br>-04                | 8.90E<br>-05                | 0.11<br>0.003  | 0.78          | 0.1            | 0.017               | 0.01<br>0.002       | 0.006<br>0.002      | 9                         | 0.44          | -06            |                    |
| C21:0                        | 0.062                     | 0.096         | 0.012                             | 0.0023                  | 0.038          | 0.016         | 0.086          | 0.001<br>6          | 0.041        | 0.013               | 0.0037       | 0.0023         | 0              | -04                   | 0.023                       | 0.023                       | 7              | 0.13          | 0.015          | 0.002<br>2          | 0.002<br>7          | 0.025               | 0.47                      | 8             | 0.003          |                    |
| C20:2                        | 9.90E-04                  | 0.017         | 0.0021                            | 0.04                    | 1.00E-<br>04   | 0.009<br>4    | 0.005<br>9     | 2.90E<br>-04        | 0.001<br>3   | 1.20E<br>-05        | 1.30E-<br>04 | 0.004<br>0.004 | 2.50E<br>-04   | 0                     | 6.20E<br>-04                | 3.90E<br>-04                | 0.001<br>4     | 0.009<br>4    | 0.001<br>4     | 2.70E<br>-04        | 1.90E<br>-06        | 2.00E<br>-05        | 9.50E<br>-04              | 9.80E<br>-029 | 0.002<br>-05   |                    |
| C20:3n6                      | 6.70E-04                  | 0.017         | 0.0015                            | 0.013                   | 1              | 0.039         | 0.023          | 0.005<br>1          | 0.013        | -05                 | 6.70E-<br>08 | 3.30E-<br>04   | 0.023          | 6.20E<br>-04          | 0                           | 1.70E<br>-07                | 0.033          | 0.16          | 0.04           | 0.001<br>1          | 2.70E<br>-04        | 2.90E<br>-05        | 5.40E<br>-05              | 0.025         | 3.40E<br>-07   |                    |
| C20:4n6                      | 3.60E-04                  | 0.017         | 0.0028                            | 0.014                   | 7.70E-<br>04   | 0.006         | 0.035          | 0.001<br>2          | 0.005<br>7   | 3.50E<br>-05        | 6.30E-<br>07 | 8.90E-<br>05   | 0.023<br>0.003 | 3.90E<br>-04          | 1.70E<br>-07                | 0                           | 0.055          | 0.22          | 0.071<br>0.002 | 7                   | 1<br>0.006          | -05<br>0.007        | -04                       | 0.022         | -07            |                    |
| C20:3n3                      | 0.2                       | 0.19          | 0.1                               | 0.0019                  | 0.017<br>0.002 | 6             | 0.004          | 0.001<br>4          | 7.70E<br>-04 | 1.80E<br>-04        | 0.017        | 0.11           | 7              | 4                     | 0.033                       | 0.055                       | 0              | 0.048         | 6              | 0.022               | 3                   | 3                   | 0.061                     | 0.06          | 3              | 0.068              |
| C22:0                        | 0.52                      | 0.15          | 0.035                             | 0.57                    | 8<br>0.005     | 0.58          | 0.46           | 0.56                | 0.06         | 0.038<br>0.007      | 0.09         | 0.78           | 0.13           | 4<br>0.001            | 0.16                        | 0.22                        | 0.048<br>0.002 | 0             | 3              | 0.042<br>0.001      | 1<br>6.00E          | 0.011               | 0.041                     | 3             | 0.2            | 0.64               |
| C20:5n3                      | 0.12                      | 0.26          | 0.0099                            | 0.0092                  | 7<br>8.60E     | 0.25          | 0.027          | 0.053               | 0.012        | 2<br>0.001          | 0.0092       | 0.1            | 0.015          | 4<br>2.70E            | 0.04<br>0.001               | 0.071<br>0.001              | 6<br>0.001     | 3             | 0              | 2                   | -04<br>0.003        | 0.013<br>4.70E      | 0.013<br>0.007            | 0.023         | 0.011          | 0.089              |
| C23:0                        | 0.0098                    | 0.016         | 6.50E-04                          | 0.015                   | -04            | 0.022         | 0.073          | 0.004               | 0.023        | 6                   | 0.0015       | 0.017          | 0.002          | -04                   | 1                           | 7                           | 0.022          | 0.042         | 2              | 0                   | 6                   | -04                 | 8                         | 0.047         | 4              | 1                  |

|         |        |       |          |        |          |       |        |          |          |          |          |          |        |          |          |          |        |        |          |          |          |          |          |          |          |          |
|---------|--------|-------|----------|--------|----------|-------|--------|----------|----------|----------|----------|----------|--------|----------|----------|----------|--------|--------|----------|----------|----------|----------|----------|----------|----------|----------|
| C24:0   | 0.0089 | 0.069 | 6.40E-04 | 0.0078 | 5.20E-04 | 0.15  | 0.022  | 0.023    | 0.0047   | 1.20E-04 | 4.20E-05 | 0.01     | 0.0022 | 1.90E-06 | 2.70E-04 | 0.0011   | 0.0063 | 0.0031 | 6.00E-04 | 0.0036   | 0        | 2.20E-05 | 8.20E-05 | 0.01     | 2.10E-04 | 0.0053   |
| C24:1   | 0.0095 | 0.085 | 0.0026   | 0.019  | 0.001    | 0.012 | 0.01   | 0.0037   | 6.70E-04 | 1.50E-06 | 9.20E-06 | 0.006    | 0.0027 | 2.00E-05 | 2.90E-05 | 6.30E-05 | 0.0073 | 0.011  | 0.013    | 4.70E-04 | 2.20E-05 | 0        | 4.20E-05 | 0.0062   | 9.50E-05 | 0.0018   |
| C22:6n3 | 0.0053 | 0.17  | 1.30E-04 | 0.056  | 0.0073   | 0.17  | 0.0096 | 0.026    | 0.01     | 6.40E-04 | 1.10E-06 | 0.0029   | 0.025  | 9.50E-04 | 5.40E-05 | 2.30E-04 | 0.061  | 0.041  | 0.013    | 0.0078   | 8.20E-05 | 4.20E-05 | 0        | 0.017    | 1.20E-04 | 0.0014   |
| SFA     | 0.17   | 0.19  | 0.063    | 0.5    | 4.50E-04 | 0.24  | 0.18   | 0.28     | 0.011    | 0.0031   | 0.017    | 0.44     | 0.47   | 0.029    | 0.025    | 0.022    | 0.063  | 0.004  | 0.023    | 0.047    | 0.012    | 0.006    | 0.017    | 0        | 0.025    | 0.28     |
| MUFA    | 0.001  | 0.039 | 0.0027   | 0.0013 | 0.0032   | 0.009 | 0.009  | 2.40E-04 | 0.0023   | 2.00E-05 | 4.70E-10 | 2.10E-06 | 0.0028 | 9.80E-05 | 3.40E-07 | 1.10E-07 | 0.0073 | 0.2    | 0.011    | 0.0014   | 2.10E-04 | 9.50E-05 | 1.20E-04 | 0.025    | 0        | 1.90E-07 |
| PUFA    | 0.0045 | 0.08  | 0.0036   | 0.0058 | 0.044    | 0.021 | 0.018  | 2.40E-04 | 0.011    | 0.0021   | 3.00E-06 | 4.00E-11 | 0.0036 | 0.002    | 1.90E-05 | 7.30E-06 | 0.006  | 0.64   | 0.089    | 0.0061   | 0.0053   | 0.0018   | 0.0014   | 1.90E-04 | 0.28     | 0        |

Table S10. Correlation between the differential lipids and differential odorants.

| Correlation coefficient       |                           |         |                               |                     |          |          |                    |                   |                    |                    |                    |                    |                    |                    |                    |                    |                    |                    |                    |                    |                    |                    |                    |                    |                    |                  |                  |            |                   |                     |                     |                     |                     |                    |           |           |           |
|-------------------------------|---------------------------|---------|-------------------------------|---------------------|----------|----------|--------------------|-------------------|--------------------|--------------------|--------------------|--------------------|--------------------|--------------------|--------------------|--------------------|--------------------|--------------------|--------------------|--------------------|--------------------|--------------------|--------------------|--------------------|--------------------|------------------|------------------|------------|-------------------|---------------------|---------------------|---------------------|---------------------|--------------------|-----------|-----------|-----------|
| Label                         | 2-Acetyl<br>-2-thiazoline | Octanal | Ethanone,<br>1-(2-pyridinyl)- | Furan,<br>2-pentyl- | Pentanal | DG 30:1  | TG<br>10:0<br>16:1 | TG<br>8:0<br>16:1 | TG<br>10:0<br>16:2 | TG<br>10:0<br>16:2 | TG<br>16:0<br>14:1 | TG<br>14:1<br>16:1 | TG<br>16:0<br>16:1 | TG<br>16:0<br>16:1 | TG<br>16:0<br>16:1 | CL<br>16:0<br>28:2 | PC<br>15:4<br>24:6 | PC<br>16:1<br>16:1 | PC<br>15:0<br>18:2 | PC<br>17:0<br>18:2 | PC<br>18:0<br>18:2 | PC<br>18:0<br>18:2 | PC<br>18:0<br>18:2 | PC<br>18:0<br>18:2 | PC<br>18:0<br>18:2 | PE<br>O-1<br>6:0 | PE<br>O-1<br>8:0 | PS<br>40:5 | LPG<br>O-2<br>4:6 | NAG<br>16:1<br>20:0 | Cer<br>16:1<br>18:2 | Cer<br>18:2<br>20:2 | Cer<br>20:2<br>20:2 | SM<br>12:1<br>12:1 |           |           |           |
|                               |                           |         |                               |                     |          |          | 0_16               | 1_18              | 0_18               | 1_18               | 1_16               | 1_16               | 1_18               | 0_28               | 15_24              | 16_16              | 15_18              | 17_18              | 18_18              | 18_18              | 18_18              | 18_18              | 18_18              | 18_18              | 18_18              | 18_18            | 18_18            | 18_18      | 18_18             | 18_18               | 18_18               | 18_18               | 18_18               | 18_18              | 18_18     | 18_18     | 18_18     |
| 2-Acetyl-2-thiazoline         | 1                         | 0.61176 | -0.65                         | -0.65               | 0.61471  | 0.58235  | 0.53824            | 0.56471           | 0.62353            | 0.57647            | 0.60294            | 0.63824            | 0.72941            | 0.75588            | 0.64706            | -0.58529           | -0.63235           | -0.69412           | -0.62941           | -0.69118           | -0.69118           | -0.69118           | -0.69118           | -0.69118           | -0.69118           | -0.69118         | -0.69118         | -0.69118   | -0.69118          | -0.69118            | -0.69118            | -0.69118            | -0.69118            | -0.69118           | -0.69118  | -0.69118  | -0.69118  |
| Octanal                       | 0.61176                   | 1       | -0.46471                      | -0.46471            | 0.71471  | 0.61176  | 0.30294            | 0.30882           | 0.34706            | 0.34706            | 0.33824            | 0.3303             | 0.32824            | 0.43765            | 0.51765            | 0.66176            | -0.53824           | -0.54706           | -0.61471           | -0.61471           | -0.61471           | -0.61471           | -0.61471           | -0.61471           | -0.61471           | -0.61471         | -0.61471         | -0.61471   | -0.61471          | -0.61471            | -0.61471            | -0.61471            | -0.61471            | -0.61471           | -0.61471  | -0.61471  | -0.61471  |
| Ethanone,<br>1-(2-pyridinyl)- | -0.6                      | 0.471   | 1                             | 0.42647             | -0.71176 | -0.58235 | -0.66176           | -0.60588          | -0.60588           | -0.60588           | -0.60588           | -0.60588           | -0.60588           | -0.60588           | -0.60588           | -0.60588           | -0.60588           | -0.60588           | -0.60588           | -0.60588           | -0.60588           | -0.60588           | -0.60588           | -0.60588           | -0.60588           | -0.60588         | -0.60588         | -0.60588   | -0.60588          | -0.60588            | -0.60588            | -0.60588            | -0.60588            | -0.60588           | -0.60588  | -0.60588  | -0.60588  |
| Furan,<br>2-pentyl-           | -0.65                     | 0.471   | 0.42647                       | 1                   | -0.39118 | -0.45882 | -0.71765           | -0.70294          | -0.70588           | -0.70588           | -0.70588           | -0.70588           | -0.70588           | -0.70588           | -0.70588           | -0.70588           | -0.70588           | -0.70588           | -0.70588           | -0.70588           | -0.70588           | -0.70588           | -0.70588           | -0.70588           | -0.70588           | -0.70588         | -0.70588         | -0.70588   | -0.70588          | -0.70588            | -0.70588            | -0.70588            | -0.70588            | -0.70588           | -0.70588  | -0.70588  | -0.70588  |
| Pentanal                      | 0.61471                   | 0.7171  | -0.71176                      | 0.9118              | 1        | 0.412    | 0.69118            | 0.73235           | 0.74706            | 0.77353            | 0.71765            | 0.75294            | 0.74118            | 0.83824            | 0.89118            | -0.76176           | -0.86176           | -0.856176          | -0.856176          | -0.856176          | -0.856176          | -0.856176          | -0.856176          | -0.856176          | -0.856176          | -0.856176        | -0.856176        | -0.856176  | -0.856176         | -0.856176           | -0.856176           | -0.856176           | -0.856176           | -0.856176          | -0.856176 | -0.856176 | -0.856176 |
| DG 30:1                       | 0.58235                   | 0.76    | -0.58235                      | 0.5882              | 0.412    | 1        | 0.824              | 0.235             | 0.118              | 0.235              | 0.882              | 0.412              | 0.706              | 0.529              | 0.235              | 0.471              | 0.4412             | 0.8529             | 0.9118             | 0.0294             | 0.0588             | 0.2353             | 0.176              | 0.235              | 0.824              | 0.529            | 0.2353           | 0.941      | 0.82              | 0.7                 | 0.412               | 0.706               | 0.9118              | 0.765              | 0.824     | 0.824     |           |
| TG<br>10:0_16:0_1<br>6:1      | 0.53824                   | 0.30294 | -0.66176                      | 0.1765              | 0.118    | 0.824    | 1                  | 0.059             | 0.0765             | 0.0529             | 0.235              | 0.059              | 0.882              | 0.412              | 0.235              | 0.235              | 0.8235             | 0.2059             | 0.3235             | -0.75              | -0.79706           | -0.79706           | -0.79706           | -0.79706           | -0.79706           | -0.79706         | -0.79706         | -0.79706   | -0.79706          | -0.79706            | -0.79706            | -0.79706            | -0.79706            | -0.79706           | -0.79706  | -0.79706  | -0.79706  |
| TG<br>8:0_16:1_18<br>1        | 0.56471                   | 0.30882 | -0.60588                      | 0.0294              | 0.235    | 0.235    | 0.059              | 1                 | 0.0706             | 0.0647             | 0.0647             | 0.0765             | 0.0529             | 0.85294            | 0.87647            | 0.75588            | -0.80294           | -0.72647           | -0.76176           | -0.75294           | -0.74412           | -0.741176          | -0.74294           | -0.74412           | -0.741176          | -0.74294         | -0.74412         | -0.741176  | -0.74294          | -0.74412            | -0.741176           | -0.74294            | -0.74412            | -0.741176          | -0.74294  | -0.74412  |           |
| TG<br>10:0_16:0_1<br>8:2      | 0.6                       | 0.34706 | -0.63824                      | 0.0588              | 0.0706   | 0.07118  | 0.0765             | 0.0706            | 1                  | 0.0941             | 0.0941             | 0.09353            | 0.09706            | 0.087353           | 0.089118           | 0.77059            | -0.82059           | -0.74412           | -0.78235           | -0.76471           | -0.75294           | -0.743529          | -0.74882           | -0.74588           | -0.74588           | -0.74588         | -0.74588         | -0.74588   | -0.74588          | -0.74588            | -0.74588            | -0.74588            | -0.74588            | -0.74588           | -0.74588  | -0.74588  |           |
| TG<br>10:0_16:1_1<br>8:2      | 0.62353                   | 0.34118 | -0.65588                      | 0.1176              | 0.353    | 0.235    | 0.529              | 0.647             | 0.941              | 1                  | 0.588              | 0.824              | 0.176              | 0.882              | 0.824              | 0.588              | -0.85882           | -0.78235           | -0.80294           | -0.79706           | -0.788235          | -0.78824           | -0.78706           | -0.78765           | -0.787118          | -0.78765         | -0.787118        | -0.78765   | -0.787118         | -0.78765            | -0.787118           | -0.78765            | -0.787118           | -0.78765           | -0.787118 | -0.78765  |           |
| TG<br>16:0_14:1_1<br>6:1      | 0.57647                   | 0.33824 | -0.66471                      | 0.9412              | 0.765    | 0.882    | 0.235              | 0.647             | 0.941              | 0.588              | 1                  | 0.588              | 0.471              | 0.059              | 0.176              | 0.118              | -0.7941            | -0.74706           | -0.76765           | -0.75294           | -0.74706           | -0.74118           | -0.74471           | -0.74059           | -0.74471           | -0.74059         | -0.74471         | -0.74059   | -0.74471          | -0.74059            | -0.74471            | -0.74059            | -0.74471            | -0.74059           | -0.74471  | -0.74059  |           |
| TG<br>14:1_16:1_1<br>6:1      | 0.60294                   | 0.3     | -0.66176                      | 0.8824              | 0.75     | 0.412    | 0.059              | 0.0765            | 0.353              | 0.824              | 0.588              | 1                  | 0.941              | 0.941              | 0.353              | 0.706              | -0.82647           | -0.7353            | -0.8529            | -0.73529           | -0.7647            | -0.7647            | -0.7647            | -0.7647            | -0.7647            | -0.7647          | -0.7647          | -0.7647    | -0.7647           | -0.7647             | -0.7647             | -0.7647             | -0.7647             | -0.7647            | -0.7647   | -0.7647   |           |
| TG<br>14:0_16:1_1<br>8:2      | 0.63824                   | 0.32353 | -0.58824                      | 0.5294              | 0.294    | 0.706    | 0.882              | 0.529             | 0.706              | 0.176              | 0.471              | 0.941              | 1                  | 0.095              | 0.471              | 0.294              | -0.80294           | -0.72059           | -0.76471           | -0.70294           | -0.78235           | -0.73529           | -0.7588            | -0.7353            | -0.7588            | -0.7353          | -0.7588          | -0.7353    | -0.7588           | -0.7353             | -0.7588             | -0.7353             | -0.7588             | -0.7353            | -0.7588   | -0.7353   |           |
| TG<br>16:0_16:1_1<br>8:2      | 0.72941                   | 0.43824 | -0.65294                      | 0.9412              | 0.118    | 0.529    | 0.412              | 0.294             | 0.353              | 0.882              | 0.059              | 0.941              | 0.095              | 1                  | 0.824              | 0.059              | -0.7647            | -0.74412           | -0.81471           | -0.76471           | -0.79412           | -0.75588           | -0.7118            | -0.7941            | -0.7588            | -0.7118          | -0.7941          | -0.7588    | -0.7118           | -0.7941             | -0.7588             | -0.7118             | -0.7941             | -0.7588            | -0.7118   | -0.7941   |           |
| TG<br>16:0_17:1_1             | 0.75588                   | 0.51765 | -0.73235                      | 0.4118              | 0.824    | 0.235    | 0.235              | 0.647             | 0.118              | 0.824              | 0.176              | 0.353              | 0.471              | 0.824              | 1                  | 0.588              | -0.7941            | -0.80294           | -0.85882           | -0.83824           | -0.8235            | -0.7353            | -0.941             | -0.412             | -0.059             | -0.941           | -0.1176          | -0.941     | -0.71             | -0.588              | -0.941              | -0.71               | -0.588              | -0.941             | -0.71     |           |           |
